# Supplementary material for: Environmental and human health at risk – scenarios to achieve the EU’s 50% pesticide reduction goals.
Source: Research Square preprint supplement (doi:10.21203/rs.3.rs-693520/v1), 2021-07-29
Supplement: Supplementary file 1 [file 38a2f21da5aa92dca1eeb7dc.docx]

**SUPPLEMENTARY MATERIAL**

| Description | | Page |
| --- | --- | --- |
| Table S1 | List of the EU approved active substances excluded from this study, per exclusion criterion. | 2 |
| Table S2 | Correspondence between PPDB and EC (eco) toxicological endpoints. | 4 |
| Table S3 | List of the active substances covered in each pesticide use scenario. | 6 |
| Table S4 | Correspondence between a.s. representative uses’ crop class and this study crop classes. | 12 |
| Table S5 | Active substances allowed per crop class and highest allowed application rates per EU region. | 13 |
| Table S6 | List of mode of action of the 230 selected active substances. | 24 |
| Table S7 | Number of active substances (a.s.) allowed per crop-EU region under the LDP scenario, range of individual a.s. inputs, and total a.s. use per crop-EU region combination. | 30 |
| Table S8 | Number of active substances (a.s.) allowed per crop-EU region under the NH scenario, range of individual a.s. inputs, and total a.s. use per crop-EU region combination. | 31 |
| Table S9 | Number of active substances (a.s.) allowed per crop-EU region under the FDP scenario, range of individual a.s. inputs, and total a.s. use per crop-EU region combination. | 32 |
| Table S10 | Number of active substances (a.s.) allowed per crop-EU region under the CFSE scenario, range of individual a.s. inputs, and total a.s. use per crop-EU region combination. | 33 |
| Table S11 | Number of active substances (a.s.) allowed per crop-EU region under the LHP scenario, range of individual a.s. inputs, and total a.s. use per crop-EU region combination. | 34 |
| Table S12 | Number of active substances (a.s.) allowed per crop-EU region under the SHH scenario, range of individual a.s. inputs, and total a.s. use per crop-EU region combination. | 35 |
| Table S13 | Number of active substances (a.s.) allowed per crop-EU region under the LET scenario, range of individual a.s. inputs, and total a.s. use per crop-EU region combination. | 36 |
| Table S14 | Expected reductions in total a.s. use after the implementation of the different pesticide reduction scenarios. | 37 |
| Table S15 | Ecotoxicological profile of the active substances allowed in the LDP scenario. | 37 |
| Table S16 | Ecotoxicological profile of the active substances allowed in the NH scenario. | 39 |
| Table S17 | Ecotoxicological profile of the active substances allowed in the FDP scenario. | 40 |
| Table S18 | Ecotoxicological profile of the active substances still likely to be found in the environment after the pesticide use stop in the TPB scenario. | 41 |
| Table S19 | Ecotoxicological profile of the active substances allowed in the CFSE scenario. | 42 |
| Table S20 | Ecotoxicological profile of the active substances allowed in the LHP scenario. | 43 |
| Table S21 | Ecotoxicological profile of the active substances allowed in the SHH scenario. | 44 |
| Table S22 | Ecotoxicological profile of the active substances allowed in the LET scenario. | 45 |
| Table S23 | Human health problems associated with the active substances allowed in the LDP scenario. | 46 |
| Table S24 | Human health problems associated with the active substances allowed in the NH scenario. | 46 |
| Table S25 | Human health problems associated with the active substances allowed in the FDP scenario. | 47 |
| Table S26 | Human health problems associated with the active substances still likely to be found in the environment after the pesticide use stop in the TPB scenario. | 47 |
| Table S27 | Human health problems associated with the active substances allowed in the CFSE scenario. | 48 |
| Table S28 | Human health problems associated with the active substances allowed in the LHP scenario. | 48 |
| Table S29 | Human health problems associated with the active substances allowed in the SHH scenario. | 49 |
| Table S30 | Human health problems associated with the active substances allowed in the LET scenario. | 49 |
| Table S31 | Expected reductions in pesticide hazard to humans and ecosystem after the implementation of the different pesticide reduction scenarios. | 50 |
| Figure S1 | Number of known soil metabolites of selected a.s., and distribution of those metabolites according to formation fraction and relevancy. | 51 |
| Figure S2 | Hazard profile of the 230 selected a.s. for eco-toxicological endpoints. | 52 |
| Figure S3 | Hazard profile of the 230 selected a.s. for human endpoints. | 53 |

**Table S1 – List of the EU approved active substances excluded from this study, per exclusion criterion.**

| **CRITERION 1: No fungicide, herbicide or insecticide properties (classification PPDB database)** | |
| --- | --- |
| 119 | Acaricides: Acequinocyl, Acrinathrin, Bifenazate, Clofentezine, Cyflumetofen, Fenazaquin, Fenpyroximate, Tebufenpyrad; Attractants: (E)-11-Tetradecen-1-yl acetate, (E)-5-Decen-1-ol, (E)-5-Decen-1-yl acetate, (E)-8-Dodecen-1-yl acetate, (E,E)-7,9-Dodecadien-1-yl acetate, (E,E)-8,10-Dodecadien-1-ol, (E,Z)-2,13-Octadecadien-1-yl acetate, (E,Z)-3,8-Tetradecadien-1-yl acetate, (E,Z)-7,9-Dodecadien-1-yl acetate, (E,Z)-8-Dodecen-1-yl acetate, (E,Z)-9-Dodecen-1-yl acetate, (E,Z,Z)-3,8,11-Tetradecatrien-1-yl acetate, (Z)-11-Hexadecen-1-ol, (Z)-11-Hexadecen-1-yl acetate, (Z)-11-Hexadecenal, (Z)-11-Tetradecen-1-yl acetate, (Z)-13-Octadecenal, (Z)-7-Tetradecenal, (Z)-8-Dodecen-1-ol, (Z)-8-Dodecen-1-yl acetate, (Z)-9-Dodecen-1-yl acetate, (Z)-9-Hexadecenal, (Z)-9-Tetradecen-1-yl acetate, (Z,E)-7,11-Hexadecadien-1-yl acetate, (Z,E)-9,11-tetradecadien-1-yl-acetate, (Z,E)-9,12-Tetradecadien-1-yl acetate, (Z,Z)-7,11-Hexadecadien-1-yl acetate, Ammonium acetate, Diammonium phosphate, Dodecan-1-ol, Dodecyl acetate, E,Z-3,13-Octadecadienyl Acetate, n-hexadecanyl acetate, n-Tetradecylacetate, Putrescine (1,4-Diaminobutane), Straight Chain Lepidopteran Pheromones, Tetradecan-1-ol, Trimethylamine hydrochloride, Z,Z-3,13-Octadecadienyl Acetate;  Bactericides: Aluminium sulphate, Sodium hypochlorite;  Elicitors: Chitosan hydrochloride, Fructose, Heptamaloxyloglucan, Laminarin, Mild Pepino Mosaic Virus isolate VC 1, Mild Pepino Mosaic Virus isolate VX 1, Sucrose, Zucchini Yellow Mosaik Virus weak strain;  Elicitor & Virus inoculation: Pepino mosaic virus strain CH2 isolate 1906;  Molluscicides: Beer, Ferric phosphate, Metaldehyde;  Nematicides: *Bacillus firmus* I-1582, Fenamiphos (aka phenamiphos), Fosthiazate, *Paecilomyces lilacinus* strain 251, *Pasteuria nishizawae* Pn1;  Plant activator: Acibenzolar-S-methyl (benzothiadiazole), Cerevisane;  Plant growth regulators: 1,4-Dimethylnaphthalene, 1-Decanol; 1-Methyl-cyclopropene, 1-Naphthylacetamide (1-NAD), 1-Naphthylacetic acid (1-NAA), 6-Benzyladenine, Carvone, Chlormequat, Daminozide, Ethephon, Ethylene, Flumetralin, Forchlorfenuron, Gibberellic acid, Gibberellin, Indolylbutyric acid, Maleic hydrazide, Mepiquat, Paclobutrazol, Prohexadione, S-Abscisic acid, Sea-algae extract (formerly sea-algae extract and seaweeds), Sintofen (aka Cintofen), Sodium 5-nitroguaiacolate, Sodium o-nitrophenolate, Sodium p-nitrophenolate, Sodium silver thiosulphate, Trinexapac (aka cimetacarb ethyl);  Repellants: Aluminium ammonium sulphate, Aluminium silicate (aka kaolin), Blood meal, Calcium carbide, Calcium carbonate, Denathonium benzoate, Fat distilation residues, Garlic extract, Limestone, Pepper dust extraction residue (PDER), Plant oils / Clove oil, Quartz sand, Repellents by smell of animal or plant origin/ fish oil, Repellents by smell of animal or plant origin/ sheep fat, Sodium aluminium silicate;  Rodenticides: Bromadiolone, Calcium phosphide, Difenacoum, Zinc phosphide;  unspecified: Clayed charcoal, Onion oil, Plant oils / Spear mint oil, Talc E553B. |
| **CRITERION 2: No data on degradation rates in soil and on predicted environmental concentration in soil (PECs; data from EU dossiers)** | |
| 116 | 2,5-Dichlorobenzoic acid methylester, 2-Phenylphenol, Acetic acid, *Adoxophyes orana* GV strain BV-000, Aluminium phosphide, *Ampelomyces quisqualis* strain AQ10, *Aureobasidium pullulans* (strains DSM 14940 and DSM 14941), *Bacillus amyloliquefaciens* MBI 600, *Bacillus amyloliquefaciens* strain FZB24, *Bacillus amyloliquefaciens* strain QST 713, *Bacillus amyloliquefaciens* *subsp. plantarum* D747, *Bacillus pumilus* QST 2808, *Bacillus thuringiensis subsp. Aizawai* strains ABTS-1857 and GC-91, *Bacillus thuringiensis subsp. Israeliensis* (serotype H-14) strain AM65-52, *Bacillus thuringiensis subsp. Kurstaki* strains ABTS 351, PB 54, SA 11, SA12 and EG 2348, *Bacillus thuringiensis subsp. Tenebrionis* strain NB 176 (TM 14 1), *Beauveria bassiana* IMI389521, *Beauveria bassiana* PPRI 5339, *Beauveria bassiana* strain 147, *Beauveria bassiana* strain NPP111B005, *Beauveria bassiana* strains ATCC 74040 and GHA, Beflubutamid, Benalaxyl, Benfluralin, Bensulfuron methyl, Benzoic acid, Bordeaux mixture, Buprofezin, Calcium hydroxide, *Candida oleophila* strain O, Capric acid, Caprylic acid, Carbon dioxide, |

T**able S1 (cont.) – List of the EU approved active substances excluded from this study, per exclusion criterion.**

| **CRITERION 2 (cont.): No data on degradation rates in soil and on predicted environmental concentration in soil (PECs; data from EU dossiers)** | |
| --- | --- |
|  | Chlorotoluron, Chlorpyrifos-methyl, *Clonostachys rosea* strain J1446, *Coniothyrium minitans* Strain CON/M/91-08 (DSM 9660), Copper hydroxide, Copper oxide, Copper oxychloride, COS-OGA, *Cydia pomonella Granulovirus* (CpGV), Deltamethrin, Diflubenzuron, *Equisetum arvense* L., Etridiazole, Fatty acids C7 to C20, Fatty acids C7-C18 and C18 unsaturated potassium salts (CAS 67701-09-1), Fatty acids C8-C10 methyl esters (CAS 85566-26-3), Fluquinconazole, Helicoverpa armigera nucleopolyhedrovirus (HearNPV), Hydrogen peroxide, Hydrolysed proteins, I*saria fumosorosea Apopka* strain 97 (formely *Paecilomyces fumosoroseus*), *Kieselgur* (diatomaceous earth), Lauric acid, *Lecanicillium muscarium* strain Ve6, Lecithins, Lime Sulphur, Magnesium phosphide, Mancozeb, Maltodextrin, MCPA, MCPB, Metalaxyl, *Metarhizium anisopliae* var. anisopliae strain BIPESCO 5/F52, Methyl decanoate, Methyl octanoate, Metiram, *Metschnikowia fructicola*, Milbemectin, Mustard seeds powder, Oleic acid, *Paecilomyces fumosoroseus* strain Fe9901, Paraffin oil/(CAS 72623-86-0), Paraffin oil/(CAS 97862-82-3), Pelargonic acid, *Phlebiopsis gigantea* (several strains), Phosphane, Pirimiphos-methyl, Plant oils / Citronella oil, Potassium hydrogen carbonate, Profoxydim, *Pseudomonas chlororaphis* strain MA342, *Pseudomonas* sp. Strain DSMZ 13134, Pythium oligandrum M1, Quizalofop-P, Rescalure, Salix spp. Cortex, *Saccharomyces cerevisiae* strain LAS02, S-Metolachlor, Sodium chloride, Sodium hydrogen carbonate,Spodoptera littoralis nucleopolyhedrovirus, Streptomyces K61, *Streptomyces lydicus* WYEC 108, Sulfuryl fluoride, Sunflower oil, Thiacloprid, Thiamethoxam, Thiencarbazone, Tribasic copper sulfate, *Trichoderma asperellum* strains ICC012, T25 and TV1, *Trichoderma asperellum* (strain T34), *Trichoderma atroviride* strains IMI 206040 and T11, *Trichoderma atroviride* strain I-1237, *Trichoderma atroviride* strain SC1, *Trichoderma gamsii* strain ICC080, *Trichoderma harzianum* strains T-22 and ITEM 908, *Trichoderma polysporum* strain IMI 206039, Triflumizole, Urea, Urtica spp., *Verticillium albo-atrum* strain WCS850, Vinegar, Whey. |
| **CRITERION 3: Not synthetic pesticides (classification from PPDB)** | |
| 19 | Natural compounds: Abamectin (aka avermectin), Azadirachtin (Margosa extract), Emamectin, Eugenol, FEN 560 (Fenugreek seed powder), Geraniol, L-Ascorbic acid, Orange oil, Plant oils/ Rape seed oil, Pyrethrins, Spinosad, tea tree oil/timorex, Terpenoid blend QRD-460, Thymol;  Inorganic compounds: Copper compounds, Disodium phosphonate, Iron sulphate, Potassium phosphonates (formerly potassium phosphite), Sulphur. |

**Table S2 - Correspondence between PPDB - Pesticide Properties DataBase and EC (eco)toxicological endpoints.** All PPDB and EC (eco)toxicological endpoints were used in the comparison however, not all endpoints were considered in this study (in grey cells). A few endpoints were discarded due to major data gaps, i.e. there was no (eco)toxicological data available for at least two-thirds the 230 selected a.s. Although “other soil macro-organisms” had also major gaps, these endpoints were not discarded, this due to the overall limited data available to caracterizae the soil compartment. The complete directory of EC endpoints was included to guarantee correct identification in EU dossiers. LD50/LC50 =Lethal Dose/Lethal Concentration 50% exposed organisms, NOAEL=No Observed Adverse Effect Level, NOEL =No Observable Effect Level. *at last access to PPDB in May 2021 mutagen category was replaced by genotoxicity.

| **Source PPDB, 2019** | **Source EC, 2015** |
| --- | --- |
| **Human Endpoints** | |
| 1. Carcinogen | Mammalian Toxicity **–** Impact on Human and Animal Health – Long-term toxicity and carcinogenicity **–** Relevant long-term NOAEL |
| Mammalian Toxicity **–** Impact on Human and Animal Health – Long-term toxicity and carcinogenicity **–** Carcinogenicity |
| Mammalian Toxicity **–** Impact on Human and Animal Health – Long-term toxicity and carcinogenicity **–** Relevant NOAEL for carcinogenicity |
| 2. Mutagen* | Mammalian Toxicity **–** Impact on Human and Animal Health – Genotoxicity **–** Photomutagenicity |
| -* | Mammalian Toxicity **–** Impact on Human and Animal Health – Genotoxicity **–** Potential for genotoxicity |
| 3. Endocrine disruptor | Mammalian Toxicity **–** Impact on Human and Animal Health – Other toxicological studies **–** Endocrine disrupting properties |
| 4. Reproduction/  development effects | Mammalian Toxicity **–** Impact on Human and Animal Health – Reproductive toxicity **–** Reproduction toxicity Relevant parental NOAEL |
| Mammalian Toxicity **–** Impact on Human and Animal Health – Reproductive toxicity **–** Reproduction toxicity Relevant reproductive NOAEL |
| Mammalian Toxicity **–** Impact on Human and Animal Health – Reproductive toxicity **–** Reproduction toxicity Relevant offspring NOAEL |
| Mammalian Toxicity **–** Impact on Human and Animal Health – Reproductive toxicity **–** Developmental toxicity Relevant maternal NOAEL |
| Mammalian Toxicity **–** Impact on Human and Animal Health – Reproductive toxicity **–** Developmental toxicity Relevant developmental NOAEL |
| 5. Acetyl cholinesterase inhibitor | - |
| 6. Neurotoxicant | Mammalian Toxicity **–** Impact on Human and Animal Health – Neurotoxicity **–** Acute neurotoxicity |
| Mammalian Toxicity **–** Impact on Human and Animal Health – Neurotoxicity **–** Repeated neurotoxicity |
| 7. Respiratory tract irritant | - |
| 8. Skin irritant | Mammalian Toxicity **–** Impact on Human and Animal Health **–** Acute toxicity **–** Skin irritation |
| 9. Skin sensitiser | Mammalian Toxicity **–** Impact on Human and Animal Health **–** Acute toxicity **–** Skin sensitisation |
| 10. Eye irritant | Mammalian Toxicity **–** Impact on Human and Animal Health **–** Acute toxicity **–** Eye irritation |
| 11. Phototoxicant | Mammalian Toxicity **–** Impact on Human and Animal Health **–** Acute toxicity **–** Phototoxicity |
| **Ecotoxicological endpoints** | |
| Mammals – acute, oral **–** LD50 | Ecotoxicology – Effects on birds and other terrestrial vertebrates – Mammals – acute – LD50 |
| Mammals **–** short-term, dietary **–** NOEL | Ecotoxicology – Effects on birds and other terrestrial vertebrates – Mammals – long-term – NOAEL |
| Birds **–** acute **–** LD50 | Ecotoxicology – Effects on birds and other terrestrial vertebrates – Birds – acute – LD50 |
| Birds **–** short-term, dietary **–** LC50/LD50 | Ecotoxicology – Effects on birds and other terrestrial vertebrates – Birds – long-term – LD50 |

**Table S2 (cont.) - Correspondence between PPDB - Pesticide Properties DataBase and EC (eco)toxicological endpoints.** All PPDB and EC (eco)toxicological endpoints were used in the comparison however, not all endpoints were considered in this study (in grey cells). A few endpoints were discarded due to major data gaps, i.e. there was no (eco)toxicological data available for at least two-thirds the 230 selected a.s. Although “other soil macro-organisms” had also major gaps, these endpoints were not discarded, this due to the overall limited data available to caracterizae the soil compartment. The complete directory of EC endpoints was included to guarantee correct identification in EU dossiers. LD50/LC50 =Lethal Dose/Lethal Concentration 50% exposed organisms, NOAEL=No Observed Adverse Effect Level, NOEL =No Observable Effect Level.

| **Source PPDB, 2019** | **Source EC, 2015** |
| --- | --- |
| **Ecotoxicological endpoints (cont.)** | |
| Fish **–** acute 96 hour **–** LC50 | Ecotoxicology – Aquatic species – Fish – acute 96 hour – LC50, mortality |
| Fish **–** chronic 21 day **–** NOEC | Ecotoxicology – Aquatic species – Fish – chronic – growth, or development, or behaviour, or reproduction NOEC |
| Aquatic invertebrates **–** acute 48 hour **–** EC50 | Ecotoxicology – Aquatic species – Aquatic invertebrates – 48 hour – EC50, mortality |
| Aquatic invertebrates **–** chronic 21 day **–** NOEC | Ecotoxicology – Aquatic species – Aquatic invertebrates – 21 day – EC50, mortality |
| Aquatic crustaceans **–** Acute 96 hour **–** LC50 | - |
| Aquatic plants **–** acute 7 day **–** EC50 | Ecotoxicology – Aquatic species – Higher plant – EC50, growth |
| Algae **–** acute 72 hour **–** EC50, growth | Ecotoxicology – Aquatic species – Algae – 72 hour – EC50, growth |
| Algae **–** acute 96 hour **–** NOEC, growth | - |
| Sediment dwelling organisms **–** Acute 96 hour **–** LC50 | - |
| Sediment dwelling organisms - Chronic 28 day **–** NOEC static, water | Ecotoxicology – Aquatic species – Sediment-dwelling organisms – 28 day – EC50, NOEC static, or semi-static or flow-through |
| Sediment dwelling organisms **–** Chronic 28 day **–** NOEC sediment | - |
| Honeybees – contact acute 48 hour **–** LD50 | Ecotoxicology – Bees – acute – contact toxicity, LD50 |
| Honeybees – oral acute 48 hour **–** LD50 | Ecotoxicology – Bees – acute – oral toxicity, LD50 |
| Honeybees **–** Unknown mode acute 48 hour **–**LD50 | - |
| - | Ecotoxicology – Bees – chronic 10 day – LC50 |
|  | Ecotoxicology – Bees – bee brood development – NOEC larvae |
|  | Ecotoxicology – Bees – sub-lethal effects (behavioural and reproductive) – NOEC |
| Earthworms – acute 14 day **–** LC50 | - |
| Earthworms – chronic **–** NOEC, reproduction | Ecotoxicology – Non-target soil meso- and macro fauna – Earthworms – chronic – NOEC growth, reproduction, behaviour |
| Other soil macro-organisms – acute – LC50/%effect | Ecotoxicology – Non-target soil meso- and macro fauna – Other soil macroorganisms – NOEC |
| Other soil macro-organisms – chronic – NOEC |
| Other arthropod 1 – % effect | Ecotoxicology – Other arthropod species – mortality, LC50 |
| Soil micro-organisms – Nitrogen mineralisation | Ecotoxicology – Nitrogen transformation, % effect |
| Soil micro-organisms – Carbon mineralisation | - |

**Table S3 – List of the active substances (a.s.) covered in each pesticide scenario.** BAU = Business As Usual, LDP = Low Dose Pesticides, NH = No Herbicides, FDP = Fast Degradable Pesticides, TPB = Total Pesticide Ban, CFSE = Candidates For Substitution Excluded, LHP = Low Hazard Pesticides, SHH = Safe Human Health, LET = Low Ecosystem Toxicity, FU = fungicide; HB = herbicide; IN = insecticide.

| **Goal** | **BAU** | **Use reduction** | | | | | **Hazard reduction** | | |
| --- | --- | --- | --- | --- | --- | --- | --- | --- | --- |
| **active substance** | **LDP** | **NH** | **FDP** | **TPB** | **CFSE** | **LHP** | **SHH** | **LET** |
| 2,4-D (HB) | ü | ü |  | ü |  | ü |  |  | ü |
| 2,4-DB (HB) | ü |  |  | ü |  | ü | ü |  |  |
| 8-Hydroxyquinoline (FU) | ü |  | ü | ü |  |  |  |  |  |
| Acetamiprid (IN) | ü | ü | ü | ü |  | ü |  | ü |  |
| Aclonifen (HB) | ü |  |  |  |  |  |  |  |  |
| Alpha-Cypermethrin (IN) | ü | ü | ü |  |  | ü |  |  |  |
| Ametoctradin (FU) | ü | ü | ü | ü |  | ü | ü | ü |  |
| Amidosulfuron (HB) | ü | ü |  | ü |  | ü | ü |  |  |
| Aminopyralid (HB) | ü | ü |  |  |  | ü | ü | ü |  |
| Amisulbrom (FU) | ü | ü | ü |  | ü | ü | ü |  |  |
| Azimsulfuron (HB) | ü | ü |  |  |  | ü | ü | ü |  |
| Azoxystrobin (FU) | ü | ü | ü |  | ü | ü | ü |  | ü |
| Benalaxyl-M (FU) | ü | ü | ü |  |  | ü | ü |  |  |
| Bentazone (HB) | ü |  |  | ü |  | ü | ü |  |  |
| Benthiavalicarb (FU) | ü | ü | ü | ü |  | ü | ü |  |  |
| Benzovindiflupyr (FU) | ü | ü | ü |  | ü |  | ü |  |  |
| Beta-Cyfluthrin (IN) | ü | ü | ü | ü | ü | ü |  |  |  |
| Bifenox (HB) | ü | ü |  | ü |  | ü | ü |  |  |
| Bifenthrin (IN) | ü | ü | ü |  | ü |  |  |  |  |
| Bispyribac-sodium (HB) | ü | ü |  | ü |  | ü | ü |  | ü |
| Bixafen (FU) | ü | ü | ü |  | ü | ü |  |  |  |
| Boscalid (FU) | ü |  | ü |  | ü | ü | ü |  |  |
| Bromoxynil (HB) | ü | ü |  | ü |  | ü | ü |  | ü |
| Bromuconazole (FU) | ü | ü | ü |  | ü |  | ü |  | ü |
| Bupirimate (FU) | ü | ü | ü |  |  | ü | ü |  |  |
| Captan (FU) | ü |  | ü | ü |  | ü |  |  | ü |
| Carbetamide (HB) | ü |  |  | ü |  | ü | ü |  |  |
| Carboxin (FU) | ü | ü | ü | ü |  | ü | ü | ü | ü |
| Carfentrazone-ethyl (HB) | ü | ü |  | ü |  | ü | ü |  |  |
| Chlorantraniliprole (IN) | ü | ü | ü |  | ü | ü | ü | ü |  |
| Chlorothalonil (FU) | ü |  | ü | ü |  | ü |  |  |  |
| Chlorpropham (HB) | ü |  |  | ü |  | ü | ü |  | ü |
| Chlorpyrifos (IN) | ü | ü | ü |  |  | ü |  |  |  |
| Chlorsulfuron (HB) | ü | ü |  |  |  | ü | ü | ü |  |
| Chromafenozide (IN) | ü | ü | ü |  | ü | ü | ü |  |  |
| Clethodim (HB) | ü | ü |  | ü |  | ü | ü | ü | ü |
| Clodinafop (HB) | ü | ü |  | ü |  | ü | ü |  |  |
| Clomazone (HB) | ü | ü |  | ü |  | ü | ü |  | ü |
| Clopyralid (HB) | ü | ü |  | ü |  | ü | ü | ü | ü |
| Cyantraniliprole (IN) | ü | ü | ü |  |  | ü | ü | ü |  |
| Cyazofamid (FU) | ü | ü | ü | ü |  | ü | ü | ü | ü |
| Cycloxydim (HB) | ü | ü |  | ü |  | ü | ü |  | ü |
| Cyflufenamid (FU) | ü | ü | ü |  |  | ü |  |  |  |
| Cyhalofop-butyl (HB) | ü | ü |  | ü |  | ü | ü | ü | ü |

**Table S3 (Cont.) – List of the active substances (a.s.) covered in each pesticide scenario.** BAU = Business As Usual, LDP = Low Dose Pesticides, NH = No Herbicides, FDP = Fast Degradable Pesticides, TPB = Total Pesticide Ban, CFSE = Candidates For Substitution Excluded, LHP = Low Hazard Pesticides, SHH = Safe Human Health, LET = Low Ecosystem Toxicity, FU = fungicide; HB = herbicide; IN = insecticide.

| **Goal** | **BAU** | **Use reduction** | | | | | **Hazard reduction** | | |
| --- | --- | --- | --- | --- | --- | --- | --- | --- | --- |
| **active substance** | **LDP** | **NH** | **FDP** | **TPB** | **CFSE** | **LHP** | **SHH** | **LET** |
| Cymoxanil (FU) | ü |  | ü | ü |  | ü | ü |  |  |
| Cypermethrin (IN) | ü | ü | ü | ü |  | ü |  |  |  |
| Cyproconazole (FU) | ü | ü | ü |  | ü |  |  |  |  |
| Cyprodinil (FU) | ü | ü | ü |  |  |  |  | ü |  |
| Cyromazine (IN) | ü |  | ü |  |  | ü | ü |  |  |
| Dazomet (FU, HB) | ü |  | ü | ü |  | ü |  |  |  |
| Desmedipham (HB) | ü | ü |  |  |  | ü |  |  | ü |
| Dicamba (HB) | ü | ü |  | ü |  | ü | ü | ü | ü |
| Dichlorprop-P (HB) | ü |  |  | ü |  | ü | ü |  |  |
| Diclofop (HB) | ü | ü |  |  |  |  | ü |  |  |
| Diethofencarb (FU) | ü | ü | ü | ü |  | ü |  |  |  |
| Difenoconazole (FU) | ü | ü | ü |  | ü |  | ü |  |  |
| Diflufenican (HB) | ü | ü |  |  | ü |  | ü | ü |  |
| Dimethachlor (HB) | ü |  |  | ü |  | ü |  |  |  |
| Dimethenamid-P (HB) | ü | ü |  | ü |  | ü |  |  |  |
| Dimethoate (IN) | ü | ü | ü | ü |  |  |  |  |  |
| Dimethomorph (FU) | ü |  | ü |  | ü | ü | ü | ü | ü |
| Dimoxystrobin (FU) | ü | ü | ü |  | ü |  |  |  |  |
| Dithianon (FU) | ü |  | ü |  |  | ü |  |  |  |
| Diuron (HB) | ü |  |  |  | ü | ü | ü |  |  |
| Dodemorph (FU) | ü |  | ü |  |  | ü |  |  |  |
| Dodine (FU) | ü |  | ü | ü |  | ü | ü | ü |  |
| Epoxiconazole (FU) | ü | ü | ü |  | ü |  |  |  | ü |
| Esfenvalerate (IN) | ü | ü | ü |  |  |  |  |  |  |
| Ethofumesate (HB) | ü |  |  |  |  | ü | ü | ü | ü |
| Ethoprophos (IN) | ü |  | ü | ü |  |  |  |  |  |
| Etofenprox (IN) | ü | ü | ü | ü |  |  |  |  |  |
| Etoxazole (IN) | ü | ü | ü | ü |  |  | ü | ü |  |
| Famoxadone (FU) | ü | ü | ü |  |  |  |  |  |  |
| Fenbuconazole (FU) | ü | ü | ü |  | ü | ü | ü |  |  |
| Fenhexamid (FU) | ü |  | ü | ü |  | ü | ü | ü |  |
| Fenoxaprop-P (HB) | ü | ü |  | ü |  | ü | ü |  |  |
| Fenoxycarb (IN) | ü | ü | ü | ü |  | ü |  |  |  |
| Fenpicoxamid (FU) | ü | ü | ü | ü |  | ü | ü | ü |  |
| Fenpropidin (FU) | ü |  | ü |  |  | ü |  |  |  |
| Fenpropimorph (FU) | ü |  | ü |  |  | ü |  |  |  |
| Fenpyrazamine (FU) | ü |  | ü |  |  | ü |  | ü |  |
| Flazasulfuron (HB) | ü | ü |  |  |  | ü | ü |  |  |
| Flonicamid (IN) | ü | ü | ü | ü |  | ü | ü |  | ü |
| Florasulam (HB) | ü | ü |  | ü |  | ü | ü | ü |  |
| Fluazifop-P (HB) | ü | ü |  | ü |  | ü | ü |  |  |
| Fluazinam (FU) | ü |  | ü |  | ü | ü |  |  |  |
| Flubendiamide (IN) | ü | ü | ü |  | ü | ü | ü |  |  |
| Fludioxonil (FU) | ü | ü | ü |  |  |  |  |  |  |

**Table S3 (Cont.) – List of the active substances (a.s.) covered in each pesticide scenario.** BAU = Business As Usual, LDP = Low Dose Pesticides, NH = No Herbicides, FDP = Fast Degradable Pesticides, TPB = Total Pesticide Ban, CFSE = Candidates For Substitution Excluded, LHP = Low Hazard Pesticides, SHH = Safe Human Health, LET = Low Ecosystem Toxicity, FU = fungicide; HB = herbicide; IN = insecticide.

| **Goal** | **BAU** | **Use reduction** | | | | | **Hazard reduction** | | |
| --- | --- | --- | --- | --- | --- | --- | --- | --- | --- |
| **active substance** | **LDP** | **NH** | **FDP** | **TPB** | **CFSE** | **LHP** | **SHH** | **LET** |
| Flufenacet (HB) | ü | ü |  |  |  |  |  | ü |  |
| Flumioxazin (HB) | ü | ü |  | ü |  |  | ü |  |  |
| Fluometuron (HB) | ü |  |  |  |  |  | ü |  | ü |
| Fluopicolide (FU) | ü | ü | ü |  | ü |  | ü |  | ü |
| Fluopyram (FU) | ü | ü | ü |  | ü | ü | ü |  |  |
| Fluoxastrobin (FU) | ü | ü | ü |  |  | ü | ü | ü | ü |
| Flupyradifurone (IN) | ü | ü | ü |  | ü | ü | ü | ü |  |
| Flurochloridone (HB) | ü | ü |  |  |  | ü | ü |  |  |
| Fluroxypyr (HB) | ü | ü |  |  |  | ü | ü |  | ü |
| Flutolanil (FU) | ü | ü | ü |  | ü | ü | ü | ü | ü |
| Flutriafol (FU) | ü | ü | ü |  | ü | ü |  |  | ü |
| Fluxapyroxad (FU) | ü | ü | ü |  | ü | ü | ü |  | ü |
| Folpet (FU) | ü |  | ü | ü |  | ü |  |  |  |
| Foramsulfuron (HB) | ü | ü |  | ü |  | ü | ü | ü |  |
| Formetanate (IN) | ü | ü | ü | ü |  | ü |  |  |  |
| Fosetyl (FU) | ü |  | ü | ü |  | ü |  |  |  |
| Fuberidazole (FU) | ü | ü | ü | ü |  | ü | ü |  |  |
| Gamma-cyhalothrin (IN) | ü | ü | ü | ü |  | ü |  |  |  |
| Glyphosate (HB) | ü |  |  | ü |  | ü | ü |  | ü |
| Halauxifen-methyl (HB) | ü | ü |  |  |  | ü | ü |  |  |
| Halosulfuron methyl (HB) | ü | ü |  |  | ü | ü | ü |  |  |
| Haloxyfop-P (HB) | ü | ü |  |  |  |  | ü |  | ü |
| Hexythiazox (IN) | ü | ü | ü | ü |  | ü |  |  |  |
| Hymexazol (FU) | ü |  | ü | ü |  | ü | ü |  |  |
| Imazalil (FU) | ü | ü | ü |  | ü | ü |  |  |  |
| Imazamox (HB) | ü | ü |  |  |  |  | ü |  | ü |
| Imidacloprid (IN) | ü | ü | ü |  | ü | ü |  |  |  |
| Indoxacarb (IN) | ü | ü | ü |  |  | ü |  |  |  |
| Iodosulfuron (HB) | ü | ü |  | ü |  | ü |  |  |  |
| Ipconazole (FU) | ü | ü | ü |  | ü | ü | ü |  |  |
| Iprovalicarb (FU) | ü | ü | ü | ü |  | ü | ü |  |  |
| Isofetamid (FU) | ü |  | ü |  |  | ü |  |  |  |
| Isopyrazam (FU) | ü | ü | ü |  | ü |  | ü |  |  |
| Isoxaben (HB) | ü | ü |  |  | ü | ü |  |  | ü |
| Isoxaflutole (HB) | ü | ü |  | ü |  | ü | ü |  | ü |
| Kresoxim-methyl (FU) | ü | ü | ü | ü |  | ü |  |  | ü |
| Lambda-Cyhalothrin (IN) | ü | ü | ü |  | ü |  |  | ü |  |
| Lenacil (HB) | ü | ü |  |  |  |  | ü |  |  |
| Lufenuron (IN) | ü | ü | ü |  | ü |  |  |  |  |
| Malathion (IN) | ü |  | ü | ü |  | ü |  |  |  |
| Mandestrobin (FU) | ü | ü | ü |  |  | ü | ü | ü |  |
| Mandipropamid (FU) | ü | ü | ü |  |  | ü | ü | ü | ü |
| Mecoprop-P (HB) | ü |  |  | ü |  | ü | ü |  | ü |
| Mepanipyrim (FU) | ü | ü | ü |  | ü | ü | ü |  |  |

**Table S3 (Cont.) – List of the active substances (a.s.) covered in each pesticide scenario.** BAU = Business As Usual, LDP = Low Dose Pesticides, NH = No Herbicides, FDP = Fast Degradable Pesticides, TPB = Total Pesticide Ban, CFSE = Candidates For Substitution Excluded, LHP = Low Hazard Pesticides, SHH = Safe Human Health, LET = Low Ecosystem Toxicity, FU = fungicide; HB = herbicide; IN = insecticide.

| **Goal** | **BAU** | **Use reduction** | | | | | **Hazard reduction** | | |
| --- | --- | --- | --- | --- | --- | --- | --- | --- | --- |
| **active substance** | **LDP** | **NH** | **FDP** | **TPB** | **CFSE** | **LHP** | **SHH** | **LET** |
| Meptyldinocap (FU) | ü | ü | ü | ü |  | ü | ü |  |  |
| Mesosulfuron (HB) | ü |  |  |  |  | ü | ü | ü |  |
| Mesotrione (HB) | ü | ü |  | ü |  | ü | ü |  | ü |
| Metaflumizone (IN) | ü | ü | ü |  |  | ü | ü |  |  |
| Metalaxyl-M (FU) | ü | ü | ü | ü |  | ü | ü | ü | ü |
| Metam (FU, IN, HB) | ü |  | ü | ü |  |  |  |  |  |
| Metamitron (HB) | ü |  |  | ü |  | ü | ü |  | ü |
| Metazachlor (HB) | ü |  |  | ü |  | ü | ü |  |  |
| Metconazole (FU) | ü | ü | ü |  | ü |  |  |  |  |
| Methiocarb (IN) | ü | ü | ü |  |  | ü |  |  |  |
| Methomyl (IN) | ü | ü | ü | ü |  |  |  | ü |  |
| Methoxyfenozide (IN) | ü | ü | ü |  | ü | ü | ü |  |  |
| Metobromuron (HB) | ü |  |  |  |  | ü | ü |  |  |
| Metosulam (HB) | ü | ü |  |  |  | ü | ü |  |  |
| Metrafenone (FU) | ü | ü | ü |  | ü | ü | ü |  |  |
| Metribuzin (HB) | ü |  |  | ü |  |  |  |  |  |
| Metsulfuron-methyl (HB) | ü | ü |  | ü |  |  | ü | ü |  |
| Myclobutanil (FU) | ü | ü | ü |  | ü |  | ü | ü | ü |
| Napropamide (HB) | ü | ü |  |  | ü | ü | ü | ü | ü |
| Nicosulfuron (HB) | ü | ü |  | ü |  |  |  | ü |  |
| Oryzalin (HB) | ü |  |  |  | ü | ü | ü |  | ü |
| Oxamyl (IN) | ü |  | ü | ü |  |  |  |  |  |
| Oxathiapiprolin (FU) | ü | ü | ü |  | ü | ü | ü | ü | ü |
| Oxyfluorfen (HB) | ü |  |  |  | ü |  |  |  |  |
| Paraffin oil(CAS 64742-46-7) (IN) | ü |  | ü |  |  | ü | ü |  |  |
| Paraffin oil(CAS 8042-47-5) (IN) | ü |  | ü |  |  | ü | ü |  |  |
| Penconazole (FU) | ü | ü | ü |  | ü | ü |  |  | ü |
| Pencycuron (FU) | ü | ü | ü |  |  | ü | ü |  |  |
| Pendimethalin (HB) | ü |  |  |  | ü |  |  |  |  |
| Penflufen (FU) | ü | ü | ü |  | ü | ü | ü |  |  |
| Penoxsulam (HB) | ü | ü |  |  |  | ü | ü |  |  |
| Penthiopyrad (FU) | ü | ü | ü |  | ü | ü | ü |  |  |
| Pethoxamid (HB) | ü |  |  | ü |  | ü | ü | ü | ü |
| Phenmedipham (HB) | ü | ü |  | ü |  | ü | ü |  |  |
| Phosmet (IN) | ü | ü | ü | ü |  | ü |  |  |  |
| Picloram (HB) | ü | ü |  |  |  | ü |  |  |  |
| Picolinafen (HB) | ü | ü |  |  |  | ü | ü | ü |  |
| Pinoxaden (HB) | ü | ü |  | ü |  | ü | ü |  |  |
| Pirimicarb (IN) | ü | ü | ü |  |  |  |  |  |  |
| Prochloraz (FU) | ü | ü | ü |  | ü |  | ü |  |  |
| Propamocarb (FU) | ü |  | ü | ü |  | ü | ü |  |  |
| Propaquizafop (HB) | ü | ü |  |  |  | ü | ü |  | ü |
| Propoxycarbazone (HB) | ü | ü |  |  | ü | ü | ü |  |  |
| Propyzamide (HB) | ü |  |  |  |  |  | ü |  |  |

**Table S3 (Cont.) – List of the active substances (a.s.) covered in each pesticide scenario.** BAU = Business As Usual, LDP = Low Dose Pesticides, NH = No Herbicides, FDP = Fast Degradable Pesticides, TPB = Total Pesticide Ban, CFSE = Candidates For Substitution Excluded, LHP = Low Hazard Pesticides, SHH = Safe Human Health, LET = Low Ecosystem Toxicity, FU = fungicide; HB = herbicide; IN = insecticide.

| **Goal** | **BAU** | **Use reduction** | | | | | **Hazard reduction** | | |
| --- | --- | --- | --- | --- | --- | --- | --- | --- | --- |
| **active substance** | **LDP** | **NH** | **FDP** | **TPB** | **CFSE** | **LHP** | **SHH** | **LET** |
| Proquinazid (FU) | ü | ü | ü |  | ü | ü | ü |  |  |
| Prosulfocarb (HB) | ü |  |  | ü |  | ü |  |  | ü |
| Prosulfuron (HB) | ü | ü |  |  | ü |  | ü | ü |  |
| Prothioconazole (FU) | ü | ü | ü | ü |  | ü |  |  | ü |
| Pyraclostrobin (FU) | ü | ü | ü |  |  | ü |  |  |  |
| Pyraflufen-ethyl (HB) | ü | ü |  | ü |  | ü | ü |  |  |
| Pyridaben (IN) | ü | ü | ü |  | ü | ü |  |  |  |
| Pyridalyl (IN) | ü | ü | ü |  | ü | ü | ü | ü |  |
| Pyridate (HB) | ü | ü |  | ü |  | ü |  |  | ü |
| Pyrimethanil (FU) | ü |  | ü |  |  | ü |  |  | ü |
| Pyriofenone (FU) | ü | ü | ü |  | ü | ü |  |  |  |
| Pyriproxyfen (IN) | ü | ü | ü | ü |  | ü |  |  |  |
| Pyroxsulam (HB) | ü | ü |  | ü |  | ü |  |  |  |
| Quinmerac (HB) | ü | ü |  | ü |  | ü | ü |  |  |
| Quizalofop-P-ethyl (HB) | ü | ü |  | ü |  | ü |  | ü |  |
| Quizalofop-P-tefuryl (HB) | ü | ü |  | ü |  |  |  |  |  |
| Rimsulfuron (HB) | ü | ü |  | ü |  | ü | ü |  |  |
| Sedaxane (FU) | ü | ü | ü |  |  | ü | ü |  |  |
| Silthiofam (FU) | ü | ü | ü |  |  | ü | ü |  |  |
| Spinetoram (IN) | ü | ü | ü | ü |  | ü | ü |  |  |
| Spirodiclofen (IN) | ü | ü | ü | ü |  | ü |  |  |  |
| Spiromesifen (IN) | ü | ü | ü | ü |  | ü | ü | ü |  |
| Spirotetramat (IN) | ü | ü | ü | ü |  | ü |  |  | ü |
| Spiroxamine (FU) | ü | ü | ü |  |  | ü |  |  |  |
| Sulcotrione (HB) | ü | ü |  | ü |  |  | ü |  | ü |
| Sulfosulfuron (HB) | ü | ü |  |  |  | ü | ü |  |  |
| Sulfoxaflor (IN) | ü | ü | ü | ü |  | ü | ü |  |  |
| tau-Fluvalinate (IN) | ü | ü | ü |  |  | ü |  |  |  |
| Tebuconazole (FU) | ü | ü | ü |  |  |  | ü |  | ü |
| Tebufenozide (IN) | ü | ü | ü |  | ü | ü | ü |  |  |
| Teflubenzuron (IN) | ü | ü | ü |  |  | ü |  |  |  |
| Tefluthrin (IN) | ü | ü | ü |  |  | ü |  |  |  |
| Tembotrione (HB) | ü | ü |  | ü |  | ü |  |  |  |
| Terbuthylazine (HB) | ü | ü |  |  |  | ü |  |  | ü |
| Tetraconazole (FU) | ü | ü | ü |  | ü | ü |  |  |  |
| Thiabendazole (FU) | ü | ü | ü |  | ü | ü | ü |  |  |
| Thifensulfuron-methyl (HB) | ü | ü |  | ü |  | ü | ü |  |  |
| Thiophanate-methyl (FU) | ü |  | ü | ü |  | ü |  |  | ü |
| Tolclofos-methyl (FU) | ü |  | ü | ü |  | ü | ü | ü |  |
| Tralkoxydim (HB) | ü | ü |  | ü |  | ü |  |  | ü |
| Triadimenol (FU) | ü | ü | ü |  | ü | ü |  |  |  |
| Tri-allate (HB) | ü |  |  |  |  |  | ü |  |  |
| Triazoxide (FU) | ü | ü | ü |  | ü |  | ü |  |  |
| Tribenuron (HB) | ü | ü |  | ü |  | ü |  |  |  |

**Table S3 (Cont.) – List of the active substances (a.s.) covered in each pesticide scenario.** BAU = Business As Usual, LDP = Low Dose Pesticides, NH = No Herbicides, FDP = Fast Degradable Pesticides, TPB = Total Pesticide Ban, CFSE = Candidates For Substitution Excluded, LHP = Low Hazard Pesticides, SHH = Safe Human Health, LET = Low Ecosystem Toxicity, FU = fungicide; HB = herbicide; IN = insecticide.

| **Goal** | **BAU** | **Use reduction** | | | | | **Hazard reduction** | | |
| --- | --- | --- | --- | --- | --- | --- | --- | --- | --- |
| **active substance** | **LDP** | **NH** | **FDP** | **TPB** | **CFSE** | **LHP** | **SHH** | **LET** |
| Triclopyr (HB) | ü |  |  |  |  | ü | ü | ü |  |
| Trifloxystrobin (FU) | ü | ü | ü | ü |  | ü |  |  |  |
| Triflumuron (IN) | ü | ü | ü | ü |  | ü | ü |  |  |
| Triflusulfuron (HB) | ü | ü |  | ü |  | ü |  |  |  |
| Triticonazole (FU) | ü | ü | ü |  | ü | ü |  |  | ü |
| Tritosulfuron (HB) | ü | ü |  | ü |  | ü | ü | ü | ü |
| Valifenalate (FU) | ü | ü | ü | ü |  | ü | ü |  |  |
| Zeta-Cypermethrin (IN) | ü | ü | ü |  |  | ü |  |  |  |
| Ziram (FU) | ü |  | ü | ü |  |  |  |  |  |
| Zoxamide (FU) | ü | ü | ü | ü |  | ü | ü | ü |  |

**Table S4 – Correspondence between crop classes in EU and specific crops in active substances representative uses.** Crop attribution to classes was made according to the LUCAS 2018 classification (*E4 LUCAS ESTAT, 2018*).

| **Crop class** | **Specific crops – representative uses** |
| --- | --- |
| Cereals | “cereals” |
| Barley |
| Oats |
| Rice |
| Rye |
| Triticale |
| Wheat |
| Dry Pulses, Vegetables, Flowers | “other vegetables” |
| Beans |
| Cabbages |
| Cauliflower |
| Cucumber |
| Eggplant |
| Lettuce |
| Ornamental plants |
| Peas |
| Pepper |
| Strawberries |
| Tomatoes |
| Grapes | Grapes |
| Vineyards |
| Grassland | Temporary grassland |
| Maize | Maize |
| Non-Permanent Industrial crops | Cotton |
| Hops |
| Rape and turnip rape |
| Soya |
| Sunflower |
| Permanent crops | Apple fruit |
| Apricots |
| Cherry fruit |
| Citrus fruit |
| Nuts trees |
| Peaches |
| Pear fruit |
| Plums |
| Root crops | Carrots |
| Onion |
| Potato |
| Sugar beet |

**Table S5 – Active substances allowed per crop class and** **their maximum recommended annual application rates per EU region, based on their EU representative use.** Annual application rates were calculated as the product of the number of recommended treatments per year and the maximum recommended application rate per treatment, per crop-EU region. In case of multiple representative uses per a.s.-crop-EU region, the application scheme leading to the highest annual application rate was selected. When this rate was the same, we selected the scheme leading to the highest pesticide content in soil immediately after application. In line with most EU dossiers approach, individual active substance applications are presented in kg ha-1, with two decimal places. NEU = Northern Europe; CEU = Central Europe; SEU = Southern Europe; FU = fungicide; HB = herbicide; IN = insecticide.

| **Crop class** | **Active substance (a.s.)** | **a.s. input (kg/ha/year)** | | |
| --- | --- | --- | --- | --- |
| **NEU** | **CEU** | **SEU** |
| Cereals | 2,4-D (HB) | 0.75 | 0.75 | 0.75 |
| 2,4-DB (HB) |  | 1.80 |  |
| Alpha-Cypermethrin (IN) | 0.02 | 0.02 | 0.02 |
| Amidosulfuron (HB) | 0.03 | 0.03 | 0.03 |
| Azimsulfuron (HB) |  | 0.03 | 0.03 |
| Azoxystrobin (FU) | 0.50 | 0.50 | 0.50 |
| Benzovindiflupyr (FU) | 0.15 | 0.15 | 0.15 |
| Beta-Cyfluthrin (IN) | 0.03 | 0.03 | 0.03 |
| Bifenox (HB) | 0.75 |  | 0.75 |
| Bifenthrin (IN) | 0.02 |  | 0.02 |
| Bispyribac (HB) |  |  | 0.03 |
| Bixafen (FU) |  | 0.25 | 0.25 |
| Bromoxynil (HB) | 0.34 | 0.34 | 0.34 |
| Bromuconazole (FU) | 0.40 | 0.40 | 0.40 |
| Carboxin (FU) | 0.13 |  | 0.13 |
| Carfentrazone-ethyl (HB) | 0.04 |  | 0.04 |
| Chlorothalonil (FU) | 1.50 | 1.50 | 1.50 |
| Chlorsulfuron (HB) | 0.02 | 0.02 | 0.02 |
| Clodinafop (HB) | 0.06 | 0.06 | 0.06 |
| Clopyralid (HB) |  | 0.08 | 0.08 |
| Cyflufenamid (FU) | 0.05 |  | 0.05 |
| Cyhalofop-butyl (HB) |  |  | 0.30 |
| Cypermethrin (IN) | 0.03 | 0.03 | 0.03 |
| Cyproconazole (FU) | 0.20 |  | 0.20 |
| Cyprodinil (FU) | 0.75 | 0.75 | 0.75 |
| Dichlorprop-P (HB) |  | 1.20 |  |
| Diclofop (HB) | 0.57 |  | 0.61 |
| Difenoconazole (FU) | 0.01 |  | 0.01 |
| Diflufenican (HB) | 0.12 | 0.12 | 0.12 |
| Dimethoate (IN) | 0.12 | 0.12 | 0.12 |
| Dimoxystrobin (FU) |  | 0.20 | 0.20 |
| Epoxiconazole (FU) | 0.25 |  | 0.25 |
| Esfenvalerate (IN) | 0.03 |  | 0.03 |
| Fenbuconazole (FU) |  | 0.15 | 0.15 |
| Fenoxaprop-P (HB) | 0.07 | 0.07 | 0.07 |
| Fenpicoxamid (FU) | 0.26 | 0.26 | 0.26 |
| Fenpropidin (FU) | 1.50 |  | 1.50 |
| Fenpropimorph (FU) | 1.50 |  | 1.50 |
| Flonicamid (IN) | 0.07 | 0.07 | 0.07 |
| Florasulam (HB) | 0.01 | 0.01 | 0.01 |

**Table S5 (cont.) – Active substances allowed per crop class and their maximum recommended annual application rates per EU region, based on their EU representative use.** Annual application rates were calculated as the product of the number of recommended treatments per year and the maximum recommended application rate per treatment, per crop-EU region. In case of multiple representative uses per a.s.-crop-EU region, the application scheme leading to the highest annual application rate was selected. When this rate was the same, we selected the scheme leading to the highest pesticide content in soil immediately after application. In line with most EU dossiers approach, individual active substance applications are presented in kg ha-1, with two decimal places. NEU = Northern Europe; CEU = Central Europe; SEU = Southern Europe; FU = fungicide; HB = herbicide; IN = insecticide.

| **Crop class** | **Active substance (a.s.)** | **a.s. input (kg/ha/year)** | | |
| --- | --- | --- | --- | --- |
| **NEU** | **CEU** | **SEU** |
| Cereals | Fludioxonil (FU) | 0.01 |  | 0.01 |
| Flufenacet (HB) |  | 0.24 | 0.24 |
| Flumioxazin (HB) | 0.03 |  |  |
| Fluoxastrobin (FU) | 0.42 |  | 0.42 |
| Fluroxypyr (HB) | 0.20 |  | 0.20 |
| Flutriafol (FU) | 0.13 |  | 0.13 |
| Fluxapyroxad (FU) | 0.25 | 0.25 | 0.25 |
| Folpet (FU) | 1.50 |  | 1.50 |
| Fuberidazole (FU) | 0.01 |  |  |
| Gamma-cyhalothrin (IN) | 0.01 |  |  |
| Glyphosate (HB) | 2.16 | 2.16 | 2.16 |
| Halauxifen-methyl (HB) |  |  | 0.01 |
| Halosulfuron methyl (HB) |  |  | 0.04 |
| Imazalil (FU) | 0.02 | 0.02 | 0.02 |
| Iodosulfuron (HB) | 0.01 | 0.01 | 0.01 |
| Ipconazole (FU) |  | 0.01 | 0.01 |
| Isopyrazam (FU) | 0.25 | 0.25 | 0.25 |
| Isoxaben (HB) | 0.13 |  | 0.13 |
| Kresoxim-methyl (FU) | 0.25 |  | 0.25 |
| Lambda-Cyhalothrin (IN) | 0.02 |  | 0.02 |
| Mecoprop-P (HB) | 1.20 | 1.20 | 1.20 |
| Mesosulfuron (HB) | 1.50 | 1.50 | 1.50 |
| Metconazole (FU) | 0.18 |  | 0.18 |
| Metosulam (HB) |  | 0.02 | 0.02 |
| Metrafenone (FU) | 0.30 |  | 0.30 |
| Metsulfuron-methyl (HB) | 0.01 | 0.01 | 0.01 |
| Pendimethalin (HB) | 1.60 | 1.60 | 1.60 |
| Penflufen (FU) |  | 0.01 |  |
| Penoxsulam (HB) |  |  | 0.04 |
| Penthiopyrad (FU) | 0.60 |  |  |
| Picolinafen (HB) | 0.10 | 0.10 | 0.10 |
| Pinoxaden (HB) | 0.06 |  | 0.06 |
| Pirimicarb (IN) | 0.30 |  | 0.42 |
| Prochloraz (FU) | 0.90 |  | 0.90 |
| Propoxycarbazone (HB) | 0.07 | 0.07 | 0.04 |
| Proquinazid (FU) |  | 0.10 |  |
| Prosulfocarb (HB) | 4.00 |  | 4.00 |
| Prothioconazole (FU) | 0.63 |  | 0.63 |
| Pyriofenone (FU) | 0.18 |  | 0.18 |
| Pyroxsulam (HB) | 0.02 |  | 0.02 |

**Table S5 (cont.) – Active substances allowed per crop class and their maximum recommended annual application rates per EU region, based on their EU representative use.** Annual application rates were calculated as the product of the number of recommended treatments per year and the maximum recommended application rate per treatment, per crop-EU region. In case of multiple representative uses per a.s.-crop-EU region, the application scheme leading to the highest annual application rate was selected. When this rate was the same, we selected the scheme leading to the highest pesticide content in soil immediately after application. In line with most EU dossiers approach, individual active substance applications are presented in kg ha-1, with two decimal places. NEU = Northern Europe; CEU = Central Europe; SEU = Southern Europe; FU = fungicide; HB = herbicide; IN = insecticide.

| **Crop class** | **Active substance (a.s.)** | **a.s. input (kg/ha/year)** | | |
| --- | --- | --- | --- | --- |
| **NEU** | **CEU** | **SEU** |
| Cereals | Sedaxane (FU) |  |  | 0.03 |
| Silthiofam (FU) | 0.05 | 0.05 | 0.05 |
| Spiroxamine (FU) | 0.75 |  | 0.75 |
| Sulfosulfuron (HB) | 0.02 |  | 0.02 |
| Sulfoxaflor (IN) | 0.02 | 0.02 | 0.02 |
| Tau-Fluvalinate (IN) | 0.10 | 0.10 | 0.10 |
| Tebuconazole (FU) | 0.50 |  | 0.50 |
| Tetraconazole (FU) | 0.13 |  | 0.13 |
| Thifensulfuron-methyl (HB) | 0.05 | 0.05 | 0.05 |
| Thiophanate-methyl (FU) |  | 0.75 | 0.75 |
| Tralkoxydim (HB) |  |  | 0.45 |
| Triadimenol (FU) | 0.09 |  | 0.09 |
| Tri-allate (HB) | 2.25 |  |  |
| Triazoxide (FU) |  | 0.01 |  |
| Tribenuron (HB) | 0.03 | 0.03 | 0.03 |
| Triticonazole (FU) | 0.01 |  | 0.01 |
| Tritosulfuron (HB) | 0.05 | 0.05 | 0.05 |
| Zeta-Cypermethrin (IN) | 0.03 | 0.03 | 0.03 |
| Dry pulses,  Vegetables  Flowers | 2,4-DB (HB) |  | 1.80 | 1.80 |
| 8-Hydroxyquinoline (FU) |  |  | 2.99 |
| Acetamiprid (IN) | 0.20 | 0.20 | 0.20 |
| Alpha-Cypermethrin (IN) | 0.03 | 0.03 | 0.03 |
| Ametoctradin (FU) | 0.72 |  | 0.72 |
| Azoxystrobin (FU) | 0.50 | 0.50 | 0.50 |
| Bentazone (HB) | 1.44 | 1.44 | 1.44 |
| Benthiavalicarb (FU) |  |  | 0.45 |
| Beta-Cyfluthrin (IN) | 0.04 | 0.04 | 0.04 |
| Bifenthrin (IN) | 0.02 |  | 0.01 |
| Boscalid (FU) | 1.00 |  | 1.00 |
| Bupirimate (FU) | 0.10 |  | 0.10 |
| Captan (FU) |  |  | 7.20 |
| Chlorantraniliprole (IN) |  |  | 0.08 |
| Chlorothalonil (FU) | 1.00 | 1.00 | 1.00 |
| Chlorpropham (HB) | 2.40 | 2.40 | 2.40 |
| Cyantraniliprole (IN) | 0.48 |  | 0.48 |
| Cyazofamid (FU) |  |  | 0.48 |
| Cycloxydim (HB) | 0.80 | 0.80 | 0.80 |
| Cymoxanil (FU) |  |  | 0.96 |
| Cyromazine (IN) | 1.20 |  | 1.20 |
| Dazomet (FU, HB) | 500.00 |  | 500.00 |

**Table S5 (cont.) – Active substances allowed per crop class and their maximum recommended annual application rates per EU region, based on their EU representative use.** Annual application rates were calculated as the product of the number of recommended treatments per year and the maximum recommended application rate per treatment, per crop-EU region. In case of multiple representative uses per a.s.-crop-EU region, the application scheme leading to the highest annual application rate was selected. When this rate was the same, we selected the scheme leading to the highest pesticide content in soil immediately after application. In line with most EU dossiers approach, individual active substance applications are presented in kg ha-1, with two decimal places. NEU = Northern Europe; CEU = Central Europe; SEU = Southern Europe; FU = fungicide; HB = herbicide; IN = insecticide.

| **Crop class** | **Active substance (a.s.)** | **a.s. input (kg/ha/year)** | | |
| --- | --- | --- | --- | --- |
| **NEU** | **CEU** | **SEU** |
| Dry pulses,  Vegetables  Flowers | Diethofencarb (FU) | 0.75 |  | 0.75 |
| Dodemorph (FU) | 16.49 |  | 16.49 |
| Dodine (FU) | 3.60 |  | 3.60 |
| Etofenprox (IN) |  |  | 0.30 |
| Etoxazole (IN) | 0.06 |  | 0.06 |
| Fenhexamid (FU) |  | 3.00 | 3.00 |
| Fenpyrazamine (FU) | 1.80 |  | 1.80 |
| Fluazifop-P (HB) | 0.32 |  | 0.32 |
| Flubendiamide (IN) | 0.14 | 0.14 | 0.14 |
| Fluopyram (FU) | 0.50 | 0.50 | 0.50 |
| Flupyradifurone (IN) | 0.13 |  | 0.13 |
| Folpet (FU) |  |  | 4.80 |
| Formetanate (IN) | 0.50 | 0.50 | 0.50 |
| Glyphosate (HB) | 1.08 | 1.08 | 1.08 |
| Haloxyfop-P (Haloxyfop-R) (HB) | 0.11 |  | 0.11 |
| Hymexazol (FU) |  |  | 1.98 |
| Imidacloprid (IN) |  |  | 0.20 |
| Indoxacarb (IN) | 0.15 | 0.15 | 0.15 |
| Isofetamid (FU) |  | 0.80 | 0.80 |
| Lambda-Cyhalothrin (IN) | 0.05 |  | 0.05 |
| Lufenuron (IN) |  |  | 0.09 |
| Malathion (IN) |  |  | 4.80 |
| Mandipropamid (FU) | 0.60 |  | 0.60 |
| Mepanipyrim (FU) |  |  | 0.80 |
| Metaflumizone (IN) | 0.05 |  | 0.05 |
| Metalaxyl-M (FU) | 0.29 | 0.29 | 0.29 |
| Metam (FU, IN, HB) | 612.00 | 612.00 | 612.00 |
| Methomyl (IN) |  |  | 0.90 |
| Methoxyfenozide (IN) | 0.14 | 0.14 | 0.24 |
| Napropamide (HB) | 0.77 | 0.77 | 0.77 |
| Oxathiapiprolin (FU) | 0.09 |  | 0.09 |
| Paraffin oil/(CAS 8042-47-5) (IN) |  | 26.21 |  |
| Penconazole (FU) | 0.20 |  | 0.20 |
| Pendimethalin (HB) |  | 1.60 |  |
| Penthiopyrad (FU) |  |  | 0.48 |
| Propamocarb (FU) | 4.77 |  | 4.77 |
| Propyzamide (HB) | 1.50 | 1.50 | 1.50 |
| Pyridaben (IN) | 0.25 |  | 0.25 |
| Pyridalyl (IN) |  |  | 0.60 |
| Pyridate (HB) | 0.90 | 0.90 | 0.90 |

**Table S5 (cont.) – Active substances allowed per crop class and their maximum recommended annual application rates per EU region, based on their EU representative use.** Annual application rates were calculated as the product of the number of recommended treatments per year and the maximum recommended application rate per treatment, per crop-EU region. In case of multiple representative uses per a.s.-crop-EU region, the application scheme leading to the highest annual application rate was selected. When this rate was the same, we selected the scheme leading to the highest pesticide content in soil immediately after application. In line with most EU dossiers approach, individual active substance applications are presented in kg ha-1, with two decimal places. NEU = Northern Europe; CEU = Central Europe; SEU = Southern Europe; FU = fungicide; HB = herbicide; IN = insecticide.

| **Crop class** | **Active substance (a.s.)** | **a.s. input (kg/ha/year)** | | |
| --- | --- | --- | --- | --- |
| **NEU** | **CEU** | **SEU** |
| Dry pulses,  Vegetables  Flowers | Pyrimethanil (FU) | 1.20 |  |  |
| Pyriproxyfen (IN) | 0.06 |  | 0.23 |
| Quizalofop-P-tefuryl (HB) | 0.10 | 0.10 | 0.10 |
| Rimsulfuron (HB) |  |  | 0.03 |
| Spiromesifen (IN) | 0.86 | 0.86 | 0.86 |
| Spirotetramat (IN) | 0.14 |  | 0.14 |
| Sulfoxaflor (IN) | 0.02 | 0.02 | 0.02 |
| Thiophanate-methyl (FU) |  | 4.15 | 4.40 |
| Tolclofos-methyl (FU) | 50.00 | 50.00 |  |
| Zeta-Cypermethrin (IN) | 0.03 | 0.03 | 0.03 |
| Grapes | Amisulbrom (FU) | 0.30 |  | 0.30 |
| Benalaxyl-M (FU) | 0.40 |  | 0.40 |
| Benthiavalicarb (FU) |  | 0.21 | 0.21 |
| Boscalid (FU) | 0.60 |  | 0.60 |
| Carfentrazone-ethyl (HB) | 0.05 |  | 0.05 |
| Chlorantraniliprole (IN) | 0.05 |  | 0.09 |
| Diethofencarb (FU) | 0.50 |  | 0.50 |
| Dimethomorph (FU) | 1.50 |  | 1.50 |
| Dithianon (FU) | 4.48 |  | 4.48 |
| Diuron (HB) | 2.00 |  | 2.00 |
| Etofenprox (IN) |  |  | 0.60 |
| Etoxazole (IN) | 0.06 |  | 0.06 |
| Famoxadone (FU) |  | 0.30 | 0.30 |
| Fenbuconazole (FU) |  | 0.43 | 0.43 |
| Fenhexamid (FU) |  | 1.60 | 1.60 |
| Fenpyrazamine (FU) | 0.60 |  | 0.60 |
| Flazasulfuron (HB) |  |  | 0.05 |
| Fludioxonil (FU) | 0.50 |  | 0.50 |
| Fluopicolide (FU) |  | 0.40 | 0.34 |
| Fluopyram (FU) | 0.50 | 0.50 | 0.50 |
| Folpet (FU) | 15.00 |  | 15.00 |
| Fosetyl (FU) | 6.00 | 6.00 | 10.56 |
| Glyphosate (HB) | 8.64 | 8.64 | 8.64 |
| Hexythiazox (IN) | 0.16 |  | 0.16 |
| Iprovalicarb (FU) | 0.86 | 0.86 | 0.86 |
| Isofetamid (FU) |  | 1.20 | 1.20 |
| Kresoxim-methyl (FU) | 0.37 |  | 0.37 |
| Lufenuron (IN) | 0.10 |  | 0.10 |
| Mandipropamid (FU) | 0.60 |  | 0.60 |
| Mepanipyrim (FU) |  |  | 0.60 |

**Table S5 (cont.) – Active substances allowed per crop class and their maximum recommended annual application rates per EU region, based on their EU representative use.** Annual application rates were calculated as the product of the number of recommended treatments per year and the maximum recommended application rate per treatment, per crop-EU region. In case of multiple representative uses per a.s.-crop-EU region, the application scheme leading to the highest annual application rate was selected. When this rate was the same, we selected the scheme leading to the highest pesticide content in soil immediately after application. In line with most EU dossiers approach, individual active substance applications are presented in kg ha-1, with two decimal places. NEU = Northern Europe; CEU = Central Europe; SEU = Southern Europe; FU = fungicide; HB = herbicide; IN = insecticide.

| **Crop class** | **Active substance (a.s.)** | **a.s. input (kg/ha/year)** | | |
| --- | --- | --- | --- | --- |
| **NEU** | **CEU** | **SEU** |
| Grapes | Meptyldinocap (FU) | 0.84 |  | 0.84 |
| Metalaxyl-M (FU) | 0.29 | 0.29 | 0.29 |
| Metam (FU, IN, HB) |  | 1020.00 | 1020.0 |
| Methomyl (IN) | 0.90 |  | 0.90 |
| Methoxyfenozide (IN) |  | 0.10 | 0.10 |
| Metrafenone (FU) | 0.80 |  | 0.80 |
| Myclobutanil (FU) | 0.19 |  | 0.19 |
| Oryzalin (HB) | 3.00 | 3.00 | 3.00 |
| Oxathiapiprolin (FU) | 0.12 | 0.12 | 0.12 |
| Oxyfluorfen (HB) | 1.44 |  | 1.44 |
| Penconazole (FU) | 0.12 |  | 0.12 |
| Proquinazid (FU) |  |  | 0.30 |
| Pyraflufen-ethyl (HB) | 0.04 | 0.04 | 0.04 |
| Pyrimethanil (FU) | 1.00 |  | 1.00 |
| Pyriofenone (FU) | 0.27 |  | 0.27 |
| Spinetoram (IN) | 0.11 |  | 0.11 |
| Spirodiclofen (IN) | 0.10 |  | 0.10 |
| Spiroxamine (FU) |  |  | 0.90 |
| Tebuconazole (FU) | 0.30 |  | 0.30 |
| Tebufenozide (IN) | 0.58 |  | 0.69 |
| Tetraconazole (FU) | 0.09 |  | 0.09 |
| Thiophanate-methyl (FU) |  | 1.10 | 1.10 |
| Triadimenol (FU) | 0.32 |  | 0.25 |
| Trifloxystrobin (FU) |  | 0.38 | 0.38 |
| Valifenalate (FU) | 0.36 |  | 0.36 |
| Zoxamide (FU) |  | 0.90 | 0.90 |
| Grassland | 2,4-DB (HB) |  | 1.80 |  |
| Amidosulfuron (HB) | 0.05 |  |  |
| Aminopyralid (HB) | 0.06 | 0.06 | 0.06 |
| Clopyralid (HB) |  | 0.12 | 0.12 |
| Dicamba (HB) | 0.96 |  | 0.96 |
| Dichlorprop-P (HB) |  | 1.50 |  |
| Florasulam (HB) | 0.01 | 0.01 | 0.01 |
| Fluroxypyr (HB) | 0.20 |  | 0.20 |
| Glyphosate (HB) | 1.08 | 1.08 | 1.08 |
| Haloxyfop-P (Haloxyfop-R) (HB) | 0.11 |  | 0.11 |
| Triclopyr (HB) | 1.44 | 1.44 | 1.44 |
| Maize | 2,4-D (HB) | 0.75 | 0.75 | 0.75 |
| Bromoxynil (HB) | 0.34 | 0.34 | 0.34 |
| Dicamba (HB) | 0.36 |  | 0.36 |

**Table S5 (cont.) – Active substances allowed per crop class and their maximum recommended annual application rates per EU region, based on their EU representative use.** Annual application rates were calculated as the product of the number of recommended treatments per year and the maximum recommended application rate per treatment, per crop-EU region. In case of multiple representative uses per a.s.-crop-EU region, the application scheme leading to the highest annual application rate was selected. When this rate was the same, we selected the scheme leading to the highest pesticide content in soil immediately after application. In line with most EU dossiers approach, individual active substance applications are presented in kg ha-1, with two decimal places. NEU = Northern Europe; CEU = Central Europe; SEU = Southern Europe; FU = fungicide; HB = herbicide; IN = insecticide.

| **Crop class** | **Active substance (a.s.)** | **a.s. input (kg/ha/year)** | | |
| --- | --- | --- | --- | --- |
| **NEU** | **CEU** | **SEU** |
| Maize | Dimethenamid-P (HB) | 0.86 | 0.86 | 0.86 |
| Florasulam (HB) | 0.01 | 0.01 | 0.01 |
| Fluroxypyr (HB) | 0.20 |  | 0.20 |
| Foramsulfuron (HB) | 0.06 | 0.06 | 0.06 |
| Glyphosate (HB) | 2.16 | 2.16 | 2.16 |
| Indoxacarb (IN) | 0.08 | 0.08 | 0.08 |
| Isoxaflutole (HB) | 0.10 |  | 0.10 |
| Mesotrione (HB) | 0.15 |  | 0.15 |
| Methiocarb (IN) | 0.15 | 0.15 | 0.15 |
| Methoxyfenozide (IN) |  | 0.14 | 0.14 |
| Metosulam (HB) |  | 0.03 |  |
| Nicosulfuron (HB) | 0.06 | 0.06 | 0.06 |
| Pethoxamid (HB) |  | 1.20 | 1.20 |
| Prosulfuron (HB) | 0.02 | 0.02 | 0.02 |
| Pyridate (HB) | 0.90 | 0.90 | 0.90 |
| Rimsulfuron (HB) | 0.02 |  | 0.02 |
| Sulcotrione (HB) | 0.45 | 0.45 | 0.45 |
| Tembotrione (HB) | 0.10 | 0.10 | 0.10 |
| Terbuthylazine (HB) | 0.75 |  | 0.84 |
| Tritosulfuron (HB) | 0.05 | 0.05 | 0.05 |
| Zeta-Cypermethrin (IN) | 0.04 | 0.04 | 0.04 |
| Non-  Permanent  Industrial crops | Aclonifen (HB) | 2.40 | 2.40 | 2.40 |
| Amidosulfuron (HB) |  | 0.03 | 0.03 |
| Carbetamide (HB) | 1.80 |  | 1.80 |
| Chlorpyrifos (IN) |  |  | 0.19 |
| Clomazone (HB) | 0.12 | 0.12 | 0.12 |
| Cycloxydim (HB) | 0.60 | 0.60 | 0.60 |
| Cypermethrin (IN) | 0.05 | 0.05 |  |
| Dimethachlor (HB) | 1.50 | 1.50 | 1.50 |
| Dimethenamid-P (HB) | 0.86 | 0.86 | 0.86 |
| Dimethomorph (FU) | 3.00 |  |  |
| Esfenvalerate (IN) | 0.05 |  | 0.03 |
| Etofenprox (IN) | 0.06 |  |  |
| Etoxazole (IN) |  |  | 0.04 |
| Fenpropimorph (FU) |  |  | 0.60 |
| Fluazifop-P (HB) | 0.32 |  | 0.32 |
| Flumioxazin (HB) | 0.05 |  | 0.05 |
| Fluometuron (HB) |  |  | 2.00 |
| Flupyradifurone (IN) | 0.15 |  |  |
| Flurochloridone (HB) | 0.75 |  | 0.75 |

**Table S5 (cont.) – Active substances allowed per crop class and their maximum recommended annual application rates per EU region, based on their EU representative use.** Annual application rates were calculated as the product of the number of recommended treatments per year and the maximum recommended application rate per treatment, per crop-EU region. In case of multiple representative uses per a.s.-crop-EU region, the application scheme leading to the highest annual application rate was selected. When this rate was the same, we selected the scheme leading to the highest pesticide content in soil immediately after application. In line with most EU dossiers approach, individual active substance applications are presented in kg ha-1, with two decimal places. NEU = Northern Europe; CEU = Central Europe; SEU = Southern Europe; FU = fungicide; HB = herbicide; IN = insecticide.

| **Crop class** | **Active substance (a.s.)** | **a.s. input (kg/ha/year)** | | |
| --- | --- | --- | --- | --- |
| **NEU** | **CEU** | **SEU** |
| Non-  Permanent  Industrial crops | Glyphosate (HB) | 2.16 | 2.16 | 2.16 |
| Haloxyfop-P (Haloxyfop-R) (HB) | 0.11 |  | 0.11 |
| Imazamox (HB) | 0.04 | 0.05 | 0.05 |
| Isofetamid (FU) |  | 0.32 | 0.32 |
| Mandestrobin (FU) | 0.20 |  | 0.20 |
| Metalaxyl-M (FU) | 0.01 | 0.01 | 0.01 |
| Metazachlor (HB) | 1.00 |  | 1.00 |
| Napropamide (HB) | 0.77 | 0.77 | 0.77 |
| Oxyfluorfen (HB) | 0.24 |  | 0.24 |
| Pethoxamid (HB) |  | 1.20 | 1.20 |
| Picloram (HB) |  | 0.02 |  |
| Propaquizafop (HB) | 0.20 |  | 0.20 |
| Propyzamide (HB) | 0.50 | 0.84 | 0.75 |
| Prothioconazole (FU) | 0.35 |  |  |
| Pyridalyl (IN) |  |  | 0.60 |
| Pyriproxyfen (IN) |  |  | 0.08 |
| Quinmerac (HB) | 0.25 | 0.25 |  |
| Quizalofop-P-tefuryl (HB) | 0.10 | 0.10 | 0.10 |
| Sulfoxaflor (IN) | 0.02 | 0.02 | 0.02 |
| Tebuconazole (FU) |  |  | 0.25 |
| Permanent  Crops | Acetamiprid (IN) | 0.15 | 0.15 | 0.15 |
| Bupirimate (FU) | 0.60 |  | 0.84 |
| Captan (FU) | 12.50 |  | 10.00 |
| Chlorantraniliprole (IN) | 0.12 |  | 0.12 |
| Chromafenozide (IN) | 0.20 |  | 0.20 |
| Cyantraniliprole (IN) |  |  | 0.30 |
| Cyprodinil (FU) | 0.90 | 0.90 | 0.90 |
| Dichlorprop-P (HB) |  |  | 0.11 |
| Difenoconazole (FU) | 0.30 |  | 0.30 |
| Dithianon (FU) | 6.30 |  | 6.30 |
| Diuron (HB) | 2.00 |  | 2.00 |
| Dodine (FU) | 3.20 |  | 3.20 |
| Etofenprox (IN) |  |  | 0.56 |
| Etoxazole (IN) | 0.06 |  | 0.06 |
| Fenbuconazole (FU) |  | 0.70 | 0.70 |
| Fenoxycarb (IN) | 0.30 |  | 0.45 |
| Flazasulfuron (HB) |  |  | 0.05 |
| Flonicamid (IN) | 0.07 | 0.07 | 0.07 |
| Fluazifop-P (HB) | 0.21 |  | 0.21 |

**Table S5 (cont.) – Active substances allowed per crop class and their maximum recommended annual application rates per EU region, based on their EU representative use.** Annual application rates were calculated as the product of the number of recommended treatments per year and the maximum recommended application rate per treatment, per crop-EU region. In case of multiple representative uses per a.s.-crop-EU region, the application scheme leading to the highest annual application rate was selected. When this rate was the same, we selected the scheme leading to the highest pesticide content in soil immediately after application. In line with most EU dossiers approach, individual active substance applications are presented in kg ha-1, with two decimal places. NEU = Northern Europe; CEU = Central Europe; SEU = Southern Europe; FU = fungicide; HB = herbicide; IN = insecticide.

| **Crop class** | **Active substance (a.s.)** | **a.s. input (kg/ha/year)** | | |
| --- | --- | --- | --- | --- |
| **NEU** | **CEU** | **SEU** |
| Permanent  Crops | Fosetyl (FU) | 10.80 | 10.80 | 10.80 |
| Glyphosate (HB) | 8.64 | 8.64 | 8.64 |
| Hexythiazox (IN) | 0.10 |  | 0.24 |
| Imidacloprid (IN) | 0.18 |  | 0.18 |
| Isofetamid (FU) |  | 0.72 | 0.72 |
| Kresoxim-methyl (FU) | 0.45 |  | 0.45 |
| lambda-Cyhalothrin (IN) | 0.05 |  | 0.05 |
| Oxyfluorfen (HB) | 1.44 |  | 1.44 |
| Paraffin oil/(CAS 64742-46-7) (IN) |  |  | 94.80 |
| Paraffin oil/(CAS 8042-47-5) (IN) |  | 16.38 |  |
| Penthiopyrad (FU) | 0.53 |  | 0.53 |
| Phosmet (IN) |  |  | 0.50 |
| Pyridaben (IN) |  |  | 0.30 |
| Pyrimethanil (FU) | 2.60 |  | 2.60 |
| Spirodiclofen (IN) | 0.14 |  | 0.14 |
| Spirotetramat (IN) |  |  | 0.58 |
| Tebufenozide (IN) | 0.36 |  | 0.58 |
| Teflubenzuron (IN) | 0.36 |  | 0.36 |
| Tetraconazole (FU) | 0.09 |  | 0.09 |
| Triflumuron (IN) | 0.36 |  | 0.36 |
| Ziram (FU) | 6.84 | 6.84 | 6.84 |
| Root crops | Acetamiprid (IN) | 0.15 | 0.15 | 0.15 |
| Ametoctradin (FU) | 0.96 |  | 0.96 |
| Amisulbrom (FU) | 0.60 |  | 0.60 |
| Bentazone (HB) |  | 0.96 | 0.96 |
| Benthiavalicarb (FU) |  | 0.17 | 0.17 |
| Beta-Cyfluthrin (IN) | 0.03 | 0.03 | 0.03 |
| Carfentrazone-ethyl (HB) | 0.10 |  | 0.10 |
| Chlorantraniliprole (IN) | 0.03 |  | 0.03 |
| Chlorothalonil (FU) | 0.75 | 0.75 | 0.75 |
| Chlorpropham (HB) | 2.40 |  |  |
| Clethodim (HB) | 0.24 |  | 0.38 |
| Clomazone (HB) | 0.09 | 0.09 | 0.09 |
| Cyazofamid (FU) | 0.48 | 0.48 | 0.48 |
| Cycloxydim (HB) | 0.60 | 0.60 | 0.60 |
| Cymoxanil (FU) | 1.40 |  | 1.40 |
| Cypermethrin (IN) |  |  | 0.05 |
| Desmedipham (HB) | 0.48 | 0.48 | 0.48 |
| Difenoconazole (FU) | 0.38 |  | 0.38 |
| Dimethenamid-P (HB) | 0.86 | 0.86 | 0.86 |

**Table S5 (cont.) – Active substances allowed per crop class and their maximum recommended annual application rates per EU region, based on their EU representative use.** Annual application rates were calculated as the product of the number of recommended treatments per year and the maximum recommended application rate per treatment, per crop-EU region. In case of multiple representative uses per a.s.-crop-EU region, the application scheme leading to the highest annual application rate was selected. When this rate was the same, we selected the scheme leading to the highest pesticide content in soil immediately after application. In line with most EU dossiers approach, individual active substance applications are presented in kg ha-1, with two decimal places. NEU = Northern Europe; CEU = Central Europe; SEU = Southern Europe; FU = fungicide; HB = herbicide; IN = insecticide.

| **Crop class** | **Active substance (a.s.)** | **a.s. input (kg/ha/year)** | | |
| --- | --- | --- | --- | --- |
| **NEU** | **CEU** | **SEU** |
| Root crops | Dimethoate (IN) | 0.20 | 0.20 | 0.20 |
| Dimethomorph (FU) | 1.44 |  | 1.44 |
| Epoxiconazole (FU) | 0.25 |  | 0.25 |
| Esfenvalerate (IN) | 0.05 |  | 0.05 |
| Ethofumesate (HB) | 1.00 | 1.00 | 1.00 |
| Ethoprophos (IN) |  | 6.00 | 6.00 |
| Fenpropimorph (FU) | 0.75 |  | 0.75 |
| Flonicamid (IN) | 0.08 | 0.08 | 0.08 |
| Fluazifop-P (HB) | 0.32 |  | 0.32 |
| Fluazinam (FU) | 2.00 | 2.00 | 2.00 |
| Fluopicolide (FU) |  | 0.40 | 0.40 |
| Flurochloridone (HB) | 0.75 |  | 0.75 |
| Flutolanil (FU) | 0.28 |  | 0.28 |
| Glyphosate (HB) | 1.08 | 1.08 | 1.08 |
| Haloxyfop-P (Haloxyfop-R) (HB) | 0.11 |  | 0.11 |
| Hymexazol (FU) | 0.07 |  | 0.07 |
| Imidacloprid (IN) | 0.12 |  |  |
| lambda-Cyhalothrin (IN) | 0.02 |  | 0.02 |
| Lenacil (HB) | 0.50 |  | 0.50 |
| Mandipropamid (FU) | 0.90 |  | 0.90 |
| Metaflumizone (IN) | 0.18 |  | 0.18 |
| Metam (FU, IN, HB) | 153.00 | 153.00 | 153.00 |
| Metamitron (HB) |  | 3.50 |  |
| Metobromuron (HB) | 2.00 | 2.00 | 2.00 |
| Metribuzin (HB) | 1.05 |  | 1.05 |
| Oxamyl (IN) | 5.50 |  | 5.50 |
| Oxathiapiprolin (FU) | 0.06 |  | 0.06 |
| Paraffin oil/(CAS 64742-46-7) (IN) |  |  | 75.60 |
| Pencycuron (FU) | 0.70 |  | 0.70 |
| Pendimethalin (HB) | 1.60 | 1.60 | 1.60 |
| Penflufen (FU) | 0.10 |  | 0.10 |
| Phenmedipham (HB) | 0.96 |  | 0.96 |
| Phosmet (IN) |  |  | 0.50 |
| Propamocarb (FU) | 6.50 |  | 6.50 |
| Propaquizafop (HB) | 0.20 |  | 0.20 |
| Prosulfocarb (HB) | 4.00 |  | 4.00 |
| Pyraclostrobin (FU) | 0.07 | 0.07 | 0.07 |
| Pyraflufen-ethyl (HB) | 0.04 | 0.04 | 0.04 |
| Quizalofop-P-ethyl (QPE) (HB) | 0.20 | 0.20 | 0.20 |
| Quizalofop-P-tefuryl (HB) | 0.10 | 0.10 | 0.10 |

**Table S5 (cont.) – Active substances allowed per crop class and their maximum recommended annual application rates per EU region, based on their EU representative use.** Annual application rates were calculated as the product of the number of recommended treatments per year and the maximum recommended application rate per treatment, per crop-EU region. In case of multiple representative uses per a.s.-crop-EU region, the application scheme leading to the highest annual application rate was selected. When this rate was the same, we selected the scheme leading to the highest pesticide content in soil immediately after application. In line with most EU dossiers approach, individual active substance applications are presented in kg ha-1, with two decimal places. NEU = Northern Europe; CEU = Central Europe; SEU = Southern Europe; FU = fungicide; HB = herbicide; IN = insecticide.

| **Crop class** | **Active substance (a.s.)** | **a.s. input (kg/ha/year)** | | |
| --- | --- | --- | --- | --- |
| **NEU** | **CEU** | **SEU** |
| Root crops | Rimsulfuron (HB) | 0.02 |  | 0.02 |
| tau-Fluvalinate (IN) |  | 0.14 | 0.14 |
| Tefluthrin (IN) | 0.02 |  | 0.02 |
| Tetraconazole (FU) | 0.20 |  | 0.20 |
| Thiabendazole (FU) | 0.30 | 0.30 | 0.30 |
| Tolclofos-methyl (FU) | 0.68 | 0.68 | 1.13 |
| Triflusulfuron (HB) | 0.06 | 0.06 | 0.06 |
| Zoxamide (FU) | 0.90 | 0.90 | 0.90 |

**Table S6 – List of mode of action of the 230 selected active substances (a.s.), per substance type.** The mode of action of individual a.s. were retrieved from the PPDB database. The modes of action were kept as specific as possible, the only changes and aggregation compared to PPDB mode of action description corresponded to situations where different a.s. presented the same mode of action but phrased slightly differently.

| Substance group | Mode of action | a.s. |
| --- | --- | --- |
| Acylamino acid | Inhibitor of cellulose synthesis. | Valifenalate |
| Alkanamide | Inhibitor of cell division. | Napropamide |
| Alkane hydrocarbon | Other - contact action, eggs covered by an oil film are starved of oxygen and so do not hatch. | Paraffin oil/(CAS 64742-46-7) |
| Paraffin oil/(CAS 8042-47-5) |
| Alkylchlorophenoxy | Other - synthetic auxin. | 2,4-D |
| Amide | Inhibitor of Succinate Dehydrogenase (SDH). | Benzovindiflupyr |
| Isofetamid |
| Amidoxine | Inhibitor of appressoria formation. | Cyflufenamid |
| Anilinopyrimidine | Inhibitor of protein synthesis. | Cyprodinil |
| Mepanipyrim |
| Pyrimethanil |
| Anthranilic diamide | Disrupts the Ca2+ balance. | Chlorantraniliprole |
| Antibiotic | Inhibitor of Qi site. | Fenpicoxamid |
| Aryloxyalkanoic acid | Other - synthetic auxin. | 2,4-DB |
| Dichlorprop-P |
| Mecoprop-P |
| Aryloxyphenoxypropionate | Inhibitor of Acetyl CoA carboxylase (ACCase). | Clodinafop |
| Cyhalofop-butyl |
| Diclofop |
| Haloxyfop-P (Haloxyfop-R) |
| Propaquizafop |
| Quizalofop-P-ethyl (QPE) |
| Quizalofop-P-tefuryl |
| Not applicable. | Fenoxaprop-P |
| Benzamide | Inhibitor of cell wall synthesis. | Isoxaben |
| Inhibitor of mitosis and cell division. | Zoxamide |
| Other - novel mode of action as fluopicolide delocalises spectrin-like proteins. | Fluopicolide |
| Inhibitor of microtubule assembly. | Propyzamide |
| Benzamide, pyramide | Inhibitor of Succinate Dehydrogenase (SDH). | Fluopyram |
| Benzene-dicarboxamide | Disrupts the Ca2+ balance. | Flubendiamide |
| Benzimidazole | Inhibitor of mitosis and cell division. | Fuberidazole |
| Thiophanate-methyl |
| Other - compromises the cytoskeleton through a selective interaction with ß-tubulin. | Thiabendazole |
| Benzofuran | Inhibitor of lipid synthesis. | Ethofumesate |
| Benzoic acid | Other - synthetic auxin. | Dicamba |
| Benzophenone | Other - interferes with hyphal morphogenesis. | Metrafenone |
| Benzothiazinone | Inhibitor of photosynthesis. | Bentazone |
| Benzotriazine | Other - not known. | Triazoxide |
| Benzoylpyridine | Inhibitor of appressoria formation. | Pyriofenone |
| Benzoylurea | Inhibitor of chitin synthesis. | Lufenuron |
| Teflubenzuron |
| Triflumuron |

**Table S6 (cont.) – List of mode of action of the 230 selected active substances (a.s.), per substance type.** The mode of action of individual a.s. were retrieved from the PPDB database. The modes of action were kept as specific as possible, the only changes and aggregation compared to PPDB mode of action description corresponded to situations where different a.s. presented the same mode of action but phrased slightly differently.

| Substance group | Mode of action | a.s. |
| --- | --- | --- |
| Butenolide | Agonist of acetylcholine receptor (nAChR). | Flupyradifurone |
| Carbamate | Inhibitor of Acetylcholinesterase (AChE). | Methiocarb |
| Oxamyl |
| Pirimicarb |
| Inhibitor of mitosis and cell division. | Carbetamide |
| Chlorpropham |
| Diethofencarb |
| Inhibitor of photosynthesis. | Desmedipham |
| Phenmedipham |
| Inhibitor of phospholipid biosynthesis. | Benthiavalicarb |
| Inhibitor of insect maturation process. | Fenoxycarb |
| Inhibitor of Cholinesterase (ChE). | Methomyl |
| Inhibitor of cellulose synthesis. | Iprovalicarb |
| Other - binds to oxygen carrying molecules and prevents tissues from using oxygen. | Metam |
| Other - multi-site activity. | Ziram |
| Other - releases methyl isothiocyanate. | Dazomet |
| Inhibitor of lipid synthesis. | Propamocarb |
| Carboxamide | Inhibitor of Succinate Dehydrogenase (SDH). | Boscalid |
| Penthiopyrad |
| Inhibitor of carotenoid biosynthesis. | Diflufenican |
| Other - non-systemic with contact and stomach action | Hexythiazox |
| Chloroacetamide | Inhibitor of ergosterol/sterol biosynthesis. | Dimethenamid-P |
| Metazachlor |
| Inhibitor of cell division. | Dimethachlor |
| Pethoxamid |
| Chloronitrile | Other - multi-site activity. | Chlorothalonil |
| Chlorophenyl | Inhibitor of lipid peroxidation. | Tolclofos-methyl |
| Cyanoacetamide oxime | Other - not known | Cymoxanil |
| Cyanoimidazole | Inhibitor of mitochondrial respiration. | Cyazofamid |
| Cyclohexadione | Inhibitor of Acetyl CoA carboxylase (ACCase). | Tralkoxydim |
| Cyclohexanedione | Inhibitor of Acetyl CoA carboxylase (ACCase). | Clethodim |
| Cycloxydim |
| Diacylhydrazine | Agonist of ecdysone. | Chromafenozide |
| Agonist of moulting hormone. | Tebufenozide |
| Agonist of 20-hydroxyecdysone hormone. | Methoxyfenozide |
| Diamide | Disrupts the Ca2+ balance. | Cyantraniliprole |
| Dinitroaniline | Inhibitor of mitosis and cell division. | Pendimethalin |
| Inhibitor of microtubule assembly. | Oryzalin |
| Dinitrophenol | Inhibitor of spore germination. | Meptyldinocap |
| Diphenyl ether | Inhibitor of protoporphyrinogen oxidase (PPO). | Oxyfluorfen |
| Inhibitor of carotenoid biosynthesis. | Aclonifen |
| Inhibitor of lipid synthesis. | Bifenox |

**Table S6 (cont.) – List of mode of action of the 230 selected active substances (a.s.), per substance type.** The mode of action of individual a.s. were retrieved from the PPDB database. The modes of action were kept as specific as possible, the only changes and aggregation compared to PPDB mode of action description corresponded to situations where different a.s. presented the same mode of action but phrased slightly differently.

| Substance group | Mode of action | a.s. |
| --- | --- | --- |
| Diphenyl oxazoline | Agonist of moulting hormone. | Etoxazole |
| Formamidine | Inhibitor of Acetylcholinesterase (AChE). | Formetanate |
| Guanidine | Other - systemic with protectant and eradicant action. | Dodine |
| Hydroxyanilide | Disrupts membrane function. | Fenhexamid |
| Hydroxybenzonitrile | Inhibitor of photosynthesis. | Bromoxynil |
| Imidazole | Disrupts membrane function. | Imazalil |
| Prochloraz |
| Imidazolinone | Inhibitor of plant amino acid synthesis (acetohydroxyacid synthase AHAS). | Imazamox |
| Isoxazolidinone | Inhibitor of lycopene cyclase. | Clomazone |
| Mandelamide | Inhibitor of cellulose synthesis. | Mandipropamid |
| Morpholine | Disrupts membrane function. | Fenpropimorph |
| Spiroxamine |
| Inhibitor of cellulose synthesis. | Dimethomorph |
| Inhibitor of ergosterol/sterol biosynthesis. | Dodemorph |
| Neonicotinoid | Agonist of acetylcholine receptor (nAChR). | Acetamiprid |
| Imidacloprid |
| N-phenylphtalamides | Inhibitor of protoporphyrinogen oxidase (PPO). | Flumioxazin |
| Organophosphate | Inhibitor of Acetylcholinesterase (AChE). | Chlorpyrifos |
| Dimethoate |
| Ethoprophos |
| Malathion |
| Phosmet |
| Other - not known. | Fosetyl |
| Oxadiazine | Other - voltage-dependent sodium channel blocker. | Indoxacarb |
| Oxathiin | Inhibitor of Succinate Dehydrogenase (SDH). | Carboxin |
| Flutolanil |
| Oxazole | Disrupts fungal nucleic acid synthesis | Hymexazol |
| Inhibitor of mitochondrial respiration. | Famoxadone |
| Oxyacetamide | Inhibitor of cell division. | Flufenacet |
| Inhibitor of 4-hydroxyphenyl-pyruvate-dioxygenase (HPPD). | Isoxaflutole |
| Phenylamide | Disrupts fungal nucleic acid synthesis. | Benalaxyl-M |
| Metalaxyl-M |
| Inhibitor of photosynthesis. | Diuron |
| Phenylpyrazole | Inhibitor of protoporphyrinogen oxidase (PPO). | Pyraflufen-ethyl |
| Phenylpyridazine | Inhibitor of electron transport at the photosystem II. | Pyridate |
| Phenylpyridinamine | Other - uncoupler of oxidative phosphorylation. | Fluazinam |
| Phenylpyrrole | Inhibitor of transport-associated phosphorylation of glucose. | Fludioxonil |
| Phenylurea | Inhibitor of electron transport at the photosystem II. | Fluometuron |
| Inhibition of mitosis and cell division. | Pencycuron |
| Phosphonoglycine | Inhibition of EPSP synthase. | Glyphosate |

**Table S6 (cont.) – List of mode of action of the 230 selected active substances (a.s.), per substance type.** The mode of action of individual a.s. were retrieved from the PPDB database. The modes of action were kept as specific as possible, the only changes and aggregation compared to PPDB mode of action description corresponded to situations where different a.s. presented the same mode of action but phrased slightly differently.

| Substance group | Mode of action | a.s. |
| --- | --- | --- |
| Phthalimide | Inhibitor of cell division. | Folpet |
| Other - multi-site activity. | Captan |
| Picolinic acid | Other - synthetic auxin. | Halauxifen-methyl |
| Piperidinyl thiazole isoxazoline | Other acts via an oxysterol binding protein. | Oxathiapiprolin |
| Pyrazole | Inhibitor of Succinate Dehydrogenase (SDH). | Isopyrazam |
| Sedaxane |
| Pyrazolium | Inhibitor of Succinate Dehydrogenase (SDH). | Bixafen |
| Fluxapyroxad |
| Penflufen |
| Inhibitor of germ tube and mycelium elongation. | Fenpyrazamine |
| Pyrethroid | Other - sodium channel modulator. | Alpha-Cypermethrin |
| Beta-Cyfluthrin |
| Bifenthrin |
| Cypermethrin |
| Esfenvalerate |
| Etofenprox |
| Gamma-cyhalothrin |
| lambda-Cyhalothrin |
| Tefluthrin |
| Zeta-Cypermethrin |
| Pyridalyl | Inhibitor of insect vigour. | Pyridalyl |
| Pyridazinone | Inhibitor of mitochondrial electron transport at complex I. | Pyridaben |
| Pyridine compound | Other - synthetic auxin. | Clopyralid |
| Fluroxypyr |
| Picloram |
| Triclopyr |
| Inhibitor of carotenoid biosynthesis. | Picolinafen |
| Disrupts insect feeding pattern. | Flonicamid (IKI-220) |
| Other - not known | Aminopyralid |
| Pyrimidinol | Inhibitor of Nucleic acid synthesis - adenosin-deaminase. | Bupirimate |
| Pyrimidinyl carboxy compound | Inhibitor of plant amino acid synthesis (acetohydroxyacid synthase AHAS). | bispyribac-sodium |
| Pyrimidinylsulfonylurea | Inhibitor of Acetolactate synthase (ALS). | Foramsulfuron |
| Quinazolinone | Inhibitor of appressoria formation. | Proquinazid |
| Quinoline | Other - chelates various metals required by micro-organisms for their metabolism. | 8-Hydroxyquinoline |
|  | Other - synthetic auxin. | Quinmerac |
| Quinone | Other - multi-site activity. | Dithianon |
| Semicarbazone | Other - attacks insect nervous system causing paralysis | Metaflumizone |
| Spinosym | Other - acts through a novel site in the nicotinic receptor. | Spinetoram |

**Table S6 (cont.) – List of mode of action of the 230 selected active substances (a.s.), per substance type.** The mode of action of individual a.s. were retrieved from the PPDB database. The modes of action were kept as specific as possible, the only changes and aggregation compared to PPDB mode of action description corresponded to situations where different a.s. presented the same mode of action but phrased slightly differently.

| Substance group | Mode of action | a.s. |
| --- | --- | --- |
| Strobilurin | Inhibitor of mitochondrial respiration. | Azoxystrobin |
| Dimoxystrobin |
| Fluoxastrobin |
| Mandestrobin |
| Pyraclostrobin |
| Trifloxystrobin |
| Other blocking electron transfer and respiration of the fungi. | Kresoxim-methyl |
| Sulfonamide | Inhibitor of mitochondrial respiration. | Amisulbrom |
| Sulfonylurea | Inhibitor of plant amino acid synthesis (acetohydroxyacid synthase AHAS). | Amidosulfuron |
| Azimsulfuron |
| Chlorsulfuron |
| Flazasulfuron |
| Halosulfuron methyl |
| Iodosulfuron |
| Mesosulfuron |
| Metsulfuron-methyl |
| Nicosulfuron |
| Prosulfuron |
| Rimsulfuron |
| Sulfosulfuron |
| Thifensulfuron-methyl |
| Tribenuron |
| Triflusulfuron |
| Tritosulfuron |
| Sulfoximine | Agonist of n-acetylcholine receptors in insects. | Sulfoxaflor |
| Synthetic pyrethroid | Other - sodium channel modulator. | tau-Fluvalinate |
| Tetramic acid | Inhibitor of protoporphyrinogen oxidase (PPO). | Spirotetramat |
| Tetronic acid | Inhibitor of lipid synthesis. | Spirodiclofen |
| Spiromesifen |
| Thiocarbamate | Inhibitor of lipid synthesis. | Prosulfocarb |
| Tri-allate |
| Thiophene | Inhibitor of mitochondrial respiration. | Silthiofam |
| Triazine | Inhibitor of chitin synthesis. | Cyromazine |
| Inhibitor of photosynthesis. | Terbuthylazine |
| Triazinone | Inhibitor of photosynthesis. | Metamitron |
| Metribuzin |
| Triazole | Inhibitor of ergosterol/sterol biosynthesis. | Bromuconazole |
| Cyproconazole |
| Epoxiconazole |
| Fenbuconazole |
| Flutriafol |
| Ipconazole |
| Metconazole |

**Table S6 (cont.) – List of mode of action of the 230 selected active substances (a.s.), per substance type.** The mode of action of individual a.s. were retrieved from the PPDB database. The modes of action were kept as specific as possible, the only changes and aggregation compared to PPDB mode of action description corresponded to situations where different a.s. presented the same mode of action but phrased slightly differently.

| Substance group | Mode of action | a.s. |
| --- | --- | --- |
| Triazole | Inhibitor of ergosterol/sterol biosynthesis. | Penconazole |
| Tetraconazole |
| Triticonazole |
| Disrupts membrane function. | Difenoconazole |
| Myclobutanil |
| Tebuconazole |
| Triadimenol |
| Triazolinthione | Inhibitor of ergosterol/sterol biosynthesis. | Prothioconazole |
| Triazolone | Disrupts membrane function. | Carfentrazone-ethyl |
|  | Inhibitor of plant amino acid synthesis (acetohydroxyacid synthase AHAS). | Propoxycarbazone |
| Triazolopyrimidine | Inhibitor of plant amino acid synthesis (acetohydroxyacid synthase AHAS). | Florasulam |
| Metosulam |
| Inhibitor of Acetolactate synthase (ALS) | Pyroxsulam |
| Inhibitor of mitochondrial respiration. | Ametoctradin |
| Triazopyrimidine | Inhibitor of plant amino acid synthesis (acetohydroxyacid synthase AHAS). | Penoxsulam |
| Triketone | Inhibitor of 4-hydroxyphenyl-pyruvate-dioxygenase (HPPD). | Mesotrione |
| Sulcotrione |
| Other multi-site activity. | Tembotrione |
| Unclassified | Inhibitor of ergosterol/sterol biosynthesis. | Fenpropidin |
| Other not applicable | Fluazifop-P |
| Inhibitor of Acetyl CoA carboxylase (ACCase). | Pinoxaden |
| Inhibitor of insect maturation process. | Pyriproxyfen |
| Inhibitor of carotenoid biosynthesis. | Flurochloridone |
| Uracil | Inhibitor of photosynthesis. | Lenacil |
| Urea | Inhibitor of electron transport at the photosystem II. | Metobromuron |

**Table S7 – Number of active substances (a.s.) allowed under the Low Dose Pesticide only (LDP) scenario, maximum recommended annual application rate among allowed a.s., and total a.s. use per crop-EU region combination.** Annual application rates were calculated as the product of the (maximum) number of recommended treatments per year and the (maximum) recommended application rate per treatment in respective EC approved, a.s. representative use. Total a.s. use was calculated as the sum of the highest annual application rate of all the a.s. allowed per crop-EU region combination. The average of total a.s. use in NEU, CEU and SEU was used in the European characterization (the last column of the table). Maximum annual application rates among allowed a.s. are presented in kg ha-1 year-1, with zero or two decimal places (if above or below 100 kg ha-1 year-1, respectively). Total a.s. use is also presented in kg ha-1 year-1, with zero decimal places. NEU = Northern Europe, CEU = Central Europe, SEU = Southern Europe. DPVF = dry pulses, vegetables, flowers; NPIC = non-permanent industrial crops; Perm. = permanent; Max. = maximum. BAU reference figures (presented in table 1, and highlighted here in light blue) were added to the table for comparison.

| **Crop** | **Parameter** | **NEU** | | **CEU** | | **SEU** | | **EUROPE** | |
| --- | --- | --- | --- | --- | --- | --- | --- | --- | --- |
| **LDP** | **BAU** | **LDP** | **BAU** | **LDP** | **BAU** | **LDP** | **BAU** |
| Cereals | Number of a.s. allowed | 67 | 77 | 43 | 51 | 78 | 88 | 85 | 98 |
| Max. recommend annual rate | 0.90 | 4.00 | 0.75 | 2.16 | 0.90 | 4.00 | 0.90 | 4.00 |
| Total a.s. use | 13 | 31 | 6 | 18 | 14 | 31 | *-* | *-* |
| Dry Pulses, Vegetables, Flowers | Number of a.s. allowed | 34 | 49 | 17 | 30 | 45 | 68 | 45 | 72 |
| Max. recommend annual rate | 0.90 | 612 | 0.90 | 612 | 0.90 | 612 | 0.90 | 612 |
| Total a.s. use | 10 | 1,210 | 6 | 713 | 15 | 1,196 | *-* | *-* |
| Grapes | Number of a.s. allowed | 29 | 40 | 12 | 19 | 41 | 56 | 41 | 56 |
| Max. recommend annual rate | 0.90 | 15.00 | 0.90 | 1,020 | 0.90 | 1,020 | 0.90 | 1,020 |
| Total a.s. use | 10 | 54 | 5 | 1,046 | 15 | 1,088 | *-* | *-* |
| Grassland | Number of a.s. allowed | 6 | 8 | 3 | 7 | 6 | 8 | 7 | 11 |
| Max. recommend annual rate | 0.96 | 1.44 | 0.12 | 1.80 | 0.96 | 1.44 | 0.96 | 1.80 |
| Total a.s. use | 1 | 4 | <1 | 6 | 1 | 4 | *-* | *-* |
| Maize | Number of a.s. allowed | 20 | 21 | 16 | 18 | 21 | 23 | 22 | 24 |
| Max. recommend annual rate | 0.90 | 2.16 | 0.90 | 2.16 | 0.90 | 2.16 | 0.90 | 2.16 |
| Total a.s. use | 5 | 8 | 4 | 7 | 6 | 9 | *-* | *-* |
| Non-Permanent Industrial crops | Number of a.s. allowed | 20 | 28 | 12 | 18 | 21 | 32 | 27 | 39 |
| Max. recommend annual rate | 0.86 | 3.00 | 0.86 | 2.40 | 0.86 | 2.40 | 0.86 | 3.00 |
| Total a.s. use | 5 | 18 | 3 | 11 | 5 | 19 | *-* | *-* |
| Permanent crops | Number of a.s. allowed | 20 | 29 | 4 | 9 | 27 | 39 | 27 | 40 |
| Max. recommend annual rate | 0.90 | 12.50 | 0.90 | 16.38 | 0.90 | 94.80 | 0.90 | 94.80 |
| Total a.s. use | 6 | 60 | 2 | 45 | 9 | 157 | *-* | *-* |
| Root crops | Number of a.s. allowed | 41 | 58 | 19 | 30 | 45 | 64 | 46 | 67 |
| Max. recommend annual rate | 0.96 | 153 | 0.90 | 153 | 0.96 | 153 | 0.96 | 153 |
| Total a.s. use | 13 | 198 | 5 | 178 | 14 | 280 | *-* | *-* |

**Table S8 – Number of active substances (a.s.) allowed under the No Herbicides (NH) scenario, maximum recommended annual application rate among allowed a.s., and total a.s. use per crop-EU region combination.** Annual application rates were calculated as the product of the (maximum) number of recommended treatments per year and the (maximum) recommended application rate per treatment in respective EC approved, a.s. representative use. Total a.s. use was calculated as the sum of the highest annual application rate of all the a.s. allowed per crop-EU region combination. The average of total a.s. use in NEU, CEU and SEU was used in the European characterization (the last column of the table). Maximum annual application rates among allowed a.s. are presented in kg ha-1 year-1, with zero or two decimal places (if above or below 100 kg ha-1 year-1, respectively). Total a.s. use is also presented in kg ha-1 year-1, with zero decimal places. NEU = Northern Europe, CEU = Central Europe, SEU = Southern Europe. DPVF = dry pulses, vegetables, flowers; NPIC = non-permanent industrial crops; Perm. = permanent; Max. = maximum. BAU reference figures (presented in table 1, and highlighted here in light blue) were added to the table for comparison.

| **Crop** | **Parameter** | **NEU** | | **CEU** | | **SEU** | | **EUROPE** | |
| --- | --- | --- | --- | --- | --- | --- | --- | --- | --- |
| **NH** | **BAU** | **NH** | **BAU** | **NH** | **BAU** | **NH** | **BAU** |
| Cereals | Number of a.s. allowed | 47 | 77 | 26 | 51 | 50 | 88 | 56 | 98 |
| Max. recommend annual rate | 1.50 | 4.00 | 1.50 | 2.16 | 1.50 | 4.00 | 1.50 | 4.00 |
| Total a.s. use | 15 | 31 | 6 | 18 | 16 | 31 | *-* | *-* |
| Dry Pulses, Vegetables, Flowers | Number of a.s. allowed | 39 | 49 | 20 | 30 | 56 | 68 | 59 | 72 |
| Max. recommend annual rate | 612 | 612 | 612 | 612 | 612 | 612 | 612 | 612 |
| Total a.s. use | 1,200 | 1,210 | 701 | 713 | 1,185 | 1,196 | *-* | *-* |
| Grapes | Number of a.s. allowed | 34 | 40 | 16 | 19 | 49 | 56 | 49 | 56 |
| Max. recommend annual rate | 15.00 | 15.00 | 1,020 | 1,020 | 1,020 | 1,020 | 1,020 | 1,020 |
| Total a.s. use | 39 | 54 | 1,034 | 1,046 | 1,073 | 1,088 | *-* | *-* |
| Grassland | Number of a.s. allowed | 0 | 8 | 0 | 7 | 0 | 8 | 0 | 11 |
| Max. recommend annual rate |  | 1.44 |  | 1.80 |  | 1.44 |  | 1.80 |
| Total a.s. use |  | 4 |  | 6 |  | 4 |  | *-* |
| Maize | Number of a.s. allowed | 3 | 21 | 4 | 18 | 4 | 23 | 4 | 24 |
| Max. recommend annual rate | 0.15 | 2.16 | 0.15 | 2.16 | 0.15 | 2.16 | 0.15 | 2.16 |
| Total a.s. use | <1 | 8 | <1 | 7 | <1 | 9 | *-* | *-* |
| Non-Permanent Industrial crops | Number of a.s. allowed | 9 | 28 | 4 | 18 | 11 | 32 | 16 | 39 |
| Max. recommend annual rate | 3.00 | 3.00 | 0.32 | 2.40 | 0.60 | 2.40 | 3.00 | 3.00 |
| Total a.s. use | 4 | 18 | <1 | 11 | 2 | 19 | *-* | *-* |
| Permanent crops | Number of a.s. allowed | 25 | 29 | 8 | 9 | 33 | 39 | 34 | 40 |
| Max. recommend annual rate | 12.50 | 12.50 | 16.38 | 16.38 | 94.80 | 94.80 | 94.80 | 94.80 |
| Total a.s. use | 48 | 60 | 37 | 45 | 144 | 157 | *-* | *-* |
| Root crops | Number of a.s. allowed | 34 | 58 | 16 | 30 | 40 | 64 | 41 | 67 |
| Max. recommend annual rate | 153 | 153 | 153 | 153 | 153 | 153 | 153 | 153 |
| Total a.s. use | 179 | 198 | 165 | 178 | 262 | 280 | *-* | *-* |

**Table S9 – Number of active substances (a.s.) allowed under the Fast Degradable Pesticides (FDP) scenario, maximum recommended annual application rate among allowed a.s., and total a.s. use per crop-EU region combination.** Annual application rates were calculated as the product of the (maximum) number of recommended treatments per year and the (maximum) recommended application rate per treatment in respective EC approved, a.s. representative use. Total a.s. use was calculated as the sum of the highest annual application rate of all the a.s. allowed per crop-EU region combination. The average of total a.s. use in NEU, CEU and SEU was used in the European characterization (the last column of the table). Maximum annual application rates among allowed a.s. are presented in kg ha-1 year-1, with zero or two decimal places (if above or below 100 kg ha-1 year-1, respectively). Total a.s. use is also presented in kg ha-1 year-1, with zero decimal places. NEU = Northern Europe, CEU = Central Europe, SEU = Southern Europe. DPVF = dry pulses, vegetables, flowers; NPIC = non-permanent industrial crops; Perm. = permanent; Max. = maximum. BAU reference figures (presented in table 1, and highlighted here in light blue) were added to the table for comparison.

| **Crop** | **Parameter** | **NEU** | | **CEU** | | **SEU** | | **EUROPE** | |
| --- | --- | --- | --- | --- | --- | --- | --- | --- | --- |
| **FDP** | **BAU** | **FDP** | **BAU** | **FDP** | **BAU** | **FDP** | **BAU** |
| Cereals | Number of a.s. allowed | 32 | 77 | 24 | 51 | 34 | 88 | 39 | 98 |
| Max. recommend annual rate | 4.00 | 4.00 | 2.16 | 2.16 | 4.00 | 4.00 | 4.00 | 4.00 |
| Total a.s. use | 14 | 31 | 11 | 18 | 16 | 31 | *-* | *-* |
| Dry Pulses, Vegetables, Flowers | Number of a.s. allowed | 24 | 49 | 18 | 30 | 37 | 68 | 38 | 72 |
| Max. recommend annual rate | 612 | 612 | 612 | 612 | 612 | 612 | 612 | 612 |
| Total a.s. use | 1,182 | 1,210 | 681 | 713 | 1,166 | 1,196 | *-* | *-* |
| Grapes | Number of a.s. allowed | 16 | 40 | 11 | 19 | 23 | 56 | 23 | 56 |
| Max. recommend annual rate | 15.00 | 15.00 | 1,020 | 1,020 | 1,020 | 1,020 | 1,020 | 1,020 |
| Total a.s. use | 34 | 54 | 1,040 | 1,046 | 1,064 | 1,088 | *-* | *-* |
| Grassland | Number of a.s. allowed | 4 | 8 | 5 | 7 | 4 | 8 | 7 | 11 |
| Max. recommend annual rate | 1.08 | 1.44 | 1.80 | 1.80 | 1.08 | 1.44 | 1.80 | 1.80 |
| Total a.s. use | 2 | 4 | 5 | 6 | 2 | 4 | *-* | *-* |
| Maize | Number of a.s. allowed | 15 | 21 | 12 | 18 | 16 | 23 | 16 | 24 |
| Max. recommend annual rate | 2.16 | 2.16 | 2.16 | 2.16 | 2.16 | 2.16 | 2.16 | 2.16 |
| Total a.s. use | 6 | 8 | 7 | 7 | 8 | 9 | *-* | *-* |
| Non-Permanent Industrial crops | Number of a.s. allowed | 16 | 28 | 12 | 18 | 16 | 32 | 20 | 39 |
| Max. recommend annual rate | 2.16 | 3.00 | 2.16 | 2.40 | 2.16 | 2.40 | 2.16 | 3.00 |
| Total a.s. use | 9 | 18 | 7 | 11 | 10 | 19 | *-* | *-* |
| Permanent crops | Number of a.s. allowed | 14 | 29 | 5 | 9 | 18 | 39 | 18 | 40 |
| Max. recommend annual rate | 12.50 | 12.50 | 10.80 | 16.38 | 10.80 | 94.80 | 12.50 | 94.80 |
| Total a.s. use | 44 | 60 | 27 | 45 | 43 | 157 | *-* | *-* |
| Root crops | Number of a.s. allowed | 30 | 58 | 21 | 30 | 34 | 64 | 36 | 67 |
| Max. recommend annual rate | 153 | 153 | 153 | 153 | 153 | 153 | 153 | 153 |
| Total a.s. use | 183 | 198 | 170 | 178 | 189 | 280 | *-* | *-* |

**Table S10 – Number of active substances (a.s.) allowed under the Candidates For Substitution Excluded (CFSE) scenario, maximum recommended annual application rate among allowed a.s., and total a.s. use per crop-EU region combination.** Annual application rates were calculated as the product of the (maximum) number of recommended treatments per year and the (maximum) recommended application rate per treatment in respective EC approved, a.s. representative use. Total a.s. use was calculated as the sum of the highest annual application rate of all the a.s. allowed per crop-EU region combination. The average of total a.s. use in NEU, CEU and SEU was used in the European characterization (the last column of the table). Maximum annual application rates among allowed a.s. are presented in kg ha-1 year-1, with zero or two decimal places (if above or below 100 kg ha-1 year-1, respectively). Total a.s. use is also presented in kg ha-1 year-1, with zero decimal places. NEU = Northern Europe, CEU = Central Europe, SEU = Southern Europe. DPVF = dry pulses, vegetables, flowers; NPIC = non-permanent industrial crops; Perm. = permanent; Max. = maximum. BAU reference figures (presented in table 1, and highlighted here in light blue) were added to the table for comparison.

| **Crop** | **Parameter** | **NEU** | | **CEU** | | **SEU** | | **EUROPE** | |
| --- | --- | --- | --- | --- | --- | --- | --- | --- | --- |
| **CFSE** | **BAU** | **CFSE** | **BAU** | **CFSE** | **BAU** | **CFSE** | **BAU** |
| Cereals | Number of a.s. allowed | 55 | 77 | 40 | 51 | 66 | 88 | 73 | 98 |
| Max. recommend annual rate | 4.00 | 4.00 | 2.16 | 2.16 | 4.00 | 4.00 | 4.00 | 4.00 |
| Total a.s. use | 23 | 31 | 14 | 18 | 24 | 31 | *-* | *-* |
| Dry Pulses, Vegetables, Flowers | Number of a.s. allowed | 42 | 49 | 26 | 30 | 57 | 68 | 60 | 72 |
| Max. recommend annual rate | 500 | 612 | 50.00 | 612 | 500 | 612 | 500 | 612 |
| Total a.s. use | 596 | 1,210 | 98 | 713 | 578 | 1,196 | *-* | *-* |
| Grapes | Number of a.s. allowed | 33 | 40 | 16 | 19 | 45 | 56 | 45 | 56 |
| Max. recommend annual rate | 15.00 | 15.00 | 8.64 | 1,020 | 15.00 | 1,020 | 15.00 | 1,020 |
| Total a.s. use | 51 | 54 | 25 | 1,046 | 63 | 1,088 | *-* | *-* |
| Grassland | Number of a.s. allowed | 7 | 8 | 7 | 7 | 7 | 8 | 10 | 11 |
| Max. recommend annual rate | 1.44 | 1.44 | 1.80 | 1.80 | 1.44 | 1.44 | 1.80 | 1.80 |
| Total a.s. use | 4 | 4 | 6 | 6 | 4 | 4 | *-* | *-* |
| Maize | Number of a.s. allowed | 18 | 21 | 15 | 18 | 20 | 23 | 21 | 24 |
| Max. recommend annual rate | 2.16 | 2.16 | 2.16 | 2.16 | 2.16 | 2.16 | 2.16 | 2.16 |
| Total a.s. use | 7 | 8 | 7 | 7 | 9 | 9 | *-* | *-* |
| Non-Permanent Industrial crops | Number of a.s. allowed | 19 | 28 | 14 | 18 | 21 | 32 | 27 | 39 |
| Max. recommend annual rate | 3.00 | 3.00 | 2.16 | 2.40 | 2.16 | 2.40 | 3.00 | 3.00 |
| Total a.s. use | 14 | 18 | 8 | 11 | 13 | 19 | *-* | *-* |
| Permanent crops | Number of a.s. allowed | 23 | 29 | 7 | 9 | 32 | 39 | 33 | 40 |
| Max. recommend annual rate | 12.50 | 12.50 | 16.38 | 16.38 | 94.80 | 94.80 | 94.80 | 94.80 |
| Total a.s. use | 50 | 60 | 37 | 45 | 147 | 157 | *-* | *-* |
| Root crops | Number of a.s. allowed | 46 | 58 | 24 | 30 | 50 | 64 | 53 | 67 |
| Max. recommend annual rate | 6.50 | 153 | 3.50 | 153 | 75.60 | 153 |  | 153 |
| Total a.s. use | 35 | 198 | 17 | 178 | 111 | 280 | *-* | *-* |

**Table S11 – Number of active substances (a.s.) allowed under the Low Hazard Pesticides (LHP) scenario, maximum recommended annual application rate among allowed a.s., and total a.s. use per crop-EU region combination.** Annual application rates were calculated as the product of the (maximum) number of recommended treatments per year and the (maximum) recommended application rate per treatment in respective EC approved, a.s. representative use. Total a.s. use was calculated as the sum of the highest annual application rate of all the a.s. allowed per crop-EU region combination. The average of total a.s. use in NEU, CEU and SEU was used in the European characterization (the last column of the table). Maximum annual application rates among allowed a.s. are presented in kg ha-1 year-1, with zero or two decimal places (if above or below 100 kg ha-1 year-1, respectively). Total a.s. use is also presented in kg ha-1 year-1, with zero decimal places. NEU = Northern Europe, CEU = Central Europe, SEU = Southern Europe. DPVF = dry pulses, vegetables, flowers; NPIC = non-permanent industrial crops; Perm. = permanent; Max. = maximum. BAU reference figures (presented in table 1, and highlighted here in light blue) were added to the table for comparison.

| **Crop** | **Parameter** | **NEU** | | **CEU** | | **SEU** | | **EUROPE** | |
| --- | --- | --- | --- | --- | --- | --- | --- | --- | --- |
| **LHP** | **BAU** | **LHP** | **BAU** | **LHP** | **BAU** | **LHP** | **BAU** |
| Cereals | Number of a.s. allowed | 40 | 77 | 34 | 51 | 47 | 88 | 56 | 98 |
| Max. recommend annual rate | 2.25 | 4.00 | 2.16 | 2.16 | 2.16 | 4.00 | 2.25 | 4.00 |
| Total a.s. use | 15 | 31 | 11 | 18 | 12 | 31 | *-* | *-* |
| Dry Pulses, Vegetables, Flowers | Number of a.s. allowed | 28 | 49 | 17 | 30 | 38 | 68 | 40 | 72 |
| Max. recommend annual rate | 50.00 | 612 | 50.00 | 612 | 4.77 | 612 | 50.00 | 612 |
| Total a.s. use | 74 | 1,210 | 91 | 713 | 34 | 1,196 | *-* | *-* |
| Grapes | Number of a.s. allowed | 23 | 40 | 13 | 19 | 32 | 56 | 32 | 56 |
| Max. recommend annual rate | 8.64 | 15.00 | 8.64 | 1,020 | 8.64 | 1,020 | 8.64 | 1,020 |
| Total a.s. use | 22 | 54 | 17 | 1,046 | 27 | 1,088 | *-* | *-* |
| Grassland | Number of a.s. allowed | 8 | 8 | 7 | 7 | 8 | 8 | 11 | 11 |
| Max. recommend annual rate | 1.44 | 1.44 | 1.80 | 1.80 | 1.44 | 1.44 | 1.80 | 1.80 |
| Total a.s. use | 4 | 4 | 6 | 6 | 4 | 4 | *-* | *-* |
| Maize | Number of a.s. allowed | 12 | 21 | 10 | 18 | 14 | 23 | 15 | 24 |
| Max. recommend annual rate | 2.16 | 2.16 | 2.16 | 2.16 | 2.16 | 2.16 | 2.16 | 2.16 |
| Total a.s. use | 4 | 8 | 4 | 7 | 5 | 9 | *-* | *-* |
| Non-Permanent Industrial crops | Number of a.s. allowed | 19 | 28 | 11 | 18 | 22 | 32 | 25 | 39 |
| Max. recommend annual rate | 3.00 | 3.00 | 2.16 | 2.40 | 2.16 | 2.40 | 2.16 | 3.00 |
| Total a.s. use | 12 | 18 | 6 | 11 | 13 | 19 | *-* | *-* |
| Permanent crops | Number of a.s. allowed | 13 | 29 | 4 | 9 | 18 | 39 | 19 | 40 |
| Max. recommend annual rate | 8.64 | 12.50 | 16.38 | 16.38 | 94.80 | 94.80 | 94.80 | 94.80 |
| Total a.s. use | 17 | 60 | 26 | 45 | 113 | 157 | *-* | *-* |
| Root crops | Number of a.s. allowed | 35 | 58 | 15 | 30 | 38 | 64 | 40 | 67 |
| Max. recommend annual rate | 6.50 | 153 | 3.50 | 153 | 75.60 | 153 | 75.60 | 153 |
| Total a.s. use | 26 | 198 | 12 | 178 | 102 | 280 | *-* | *-* |

**Table S12 – Number of active substances (a.s.) allowed under the Safe Human Health (SHH) scenario, maximum recommended annual application rate among allowed a.s., and total a.s. use per crop-EU region combination.** Annual application rates were calculated as the product of the (maximum) number of recommended treatments per year and the (maximum) recommended application rate per treatment in respective EC approved, a.s. representative use. Total a.s. use was calculated as the sum of the highest annual application rate of all the a.s. allowed per crop-EU region combination. The average of total a.s. use in NEU, CEU and SEU was used in the European characterization (the last column of the table). Maximum annual application rates among allowed a.s. are presented in kg ha-1 year-1, with zero or two decimal places (if above or below 100 kg ha-1 year-1, respectively). Total a.s. use is also presented in kg ha-1 year-1, with zero decimal places. NEU = Northern Europe, CEU = Central Europe, SEU = Southern Europe. DPVF = dry pulses, vegetables, flowers; NPIC = non-permanent industrial crops; Perm. = permanent; Max. = maximum. BAU reference figures (presented in table 1, and highlighted here in light blue) were added to the table for comparison.

| **Crop** | **Parameter** | **NEU** | | **CEU** | | **SEU** | | **EUROPE** | |
| --- | --- | --- | --- | --- | --- | --- | --- | --- | --- |
| **SHH** | **BAU** | **SHH** | **BAU** | **SHH** | **BAU** | **SHH** | **BAU** |
| Cereals | Number of a.s. allowed | 12 | 77 | 12 | 51 | 16 | 88 | 16 | 98 |
| Max. recommend annual rate | 1.50 | 4.00 | 1.50 | 2.16 | 1.50 | 4.00 | 1.50 | 4.00 |
| Total a.s. use | 3 | 31 | 3 | 18 | 4 | 31 | *-* | *-* |
| Dry Pulses, Vegetables, Flowers | Number of a.s. allowed | 14 | 49 | 6 | 30 | 18 | 68 | 19 | 72 |
| Max. recommend annual rate | 50.00 | 612 | 50.00 | 612 | 3.60 | 612 | 50.00 | 612 |
| Total a.s. use | 60 | 1,210 | 55 | 713 | 15 | 1,196 | *-* | *-* |
| Grapes | Number of a.s. allowed | 9 | 40 | 4 | 19 | 11 | 56 | 11 | 56 |
| Max. recommend annual rate | 1.50 | 15.00 | 1.60 | 1,020 | 1.60 | 1,020 | 1.60 | 1,020 |
| Total a.s. use | 4 | 54 | 3 | 1,046 | 7 | 1,088 | *-* | *-* |
| Grassland | Number of a.s. allowed | 4 | 8 | 4 | 7 | 5 | 8 | 5 | 11 |
| Max. recommend annual rate | 1.44 | 1.44 | 1.44 | 1.80 | 1.44 | 1.44 | 1.44 | 1.80 |
| Total a.s. use | 2 | 4 | 2 | 6 | 3 | 4 | *-* | *-* |
| Maize | Number of a.s. allowed | 6 | 21 | 6 | 18 | 7 | 23 | 7 | 24 |
| Max. recommend annual rate | 0.36 | 2.16 | 1.20 | 2.16 | 1.20 | 2.16 | 1.20 | 2.16 |
| Total a.s. use | 1 | 8 | 1 | 7 | 2 | 9 | *-* | *-* |
| Non-Permanent Industrial crops | Number of a.s. allowed | 5 | 28 | 3 | 18 | 6 | 32 | 8 | 39 |
| Max. recommend annual rate | 3.00 | 3.00 | 1.20 | 2.40 | 1.20 | 2.40 | 3.00 | 3.00 |
| Total a.s. use | 4 | 18 | 2 | 11 | 3 | 19 | *-* | *-* |
| Permanent crops | Number of a.s. allowed | 6 | 29 | 2 | 9 | 7 | 39 | 7 | 40 |
| Max. recommend annual rate | 3.20 | 12.50 | 0.90 | 16.38 | 3.20 | 94.80 | 3.20 | 94.80 |
| Total a.s. use | 4 | 60 | 1 | 45 | 5 | 157 | *-* | *-* |
| Root crops | Number of a.s. allowed | 14 | 58 | 6 | 30 | 14 | 64 | 14 | 67 |
| Max. recommend annual rate | 1.44 | 153 | 1.00 | 153 | 1.44 | 153 | 1.44 | 153 |
| Total a.s. use | 7 | 198 | 3 | 178 | 8 | 280 | *-* | *-* |

**Table S13 – Number of active substances (a.s.) allowed under the** **Low Ecosystem Toxicity (LET) scenario, maximum recommended annual application rate among allowed a.s., and total a.s. use per crop-EU region combination.** Annual application rates were calculated as the product of the (maximum) number of recommended treatments per year and the (maximum) recommended application rate per treatment in respective EC approved, a.s. representative use. Total a.s. use was calculated as the sum of the highest annual application rate of all the a.s. allowed per crop-EU region combination. The average of total a.s. use in NEU, CEU and SEU was used in the European characterization (the last column of the table). Maximum annual application rates among allowed a.s. are presented in kg ha-1 year-1, with zero or two decimal places (if above or below 100 kg ha-1 year-1, respectively). Total a.s. use is also presented in kg ha-1 year-1, with zero decimal places. NEU = Northern Europe, CEU = Central Europe, SEU = Southern Europe. DPVF = dry pulses, vegetables, flowers; NPIC = non-permanent industrial crops; Perm. = permanent; Max. = maximum. BAU reference figures (presented in table 1, and highlighted here in light blue) were added to the table for comparison.

| **Crop** | **Parameter** | **NEU** | | **CEU** | | **SEU** | | **EUROPE** | |
| --- | --- | --- | --- | --- | --- | --- | --- | --- | --- |
| **LET** | **BAU** | **LET** | **BAU** | **LET** | **BAU** | **LET** | **BAU** |
| Cereals | Number of a.s. allowed | 20 | 77 | 11 | 51 | 25 | 88 | 25 | 98 |
| Max. recommend annual rate | 4.00 | 4.00 | 2.16 | 2.16 | 4.00 | 4.00 | 4.00 | 4.00 |
| Total a.s. use | 12 | 31 | 7 | 18 | 14 | 31 | *-* | *-* |
| Dry Pulses, Vegetables, Flowers | Number of a.s. allowed | 13 | 49 | 8 | 30 | 15 | 68 | 16 | 72 |
| Max. recommend annual rate | 2.40 | 612 | 4.15 | 612 | 7.20 | 612 | 7.20 | 612 |
| Total a.s. use | 9 | 1,210 | 11 | 713 | 20 | 1,196 | *-* | *-* |
| Grapes | Number of a.s. allowed | 11 | 40 | 6 | 19 | 13 | 56 | 13 | 56 |
| Max. recommend annual rate | 8.64 | 15.00 | 8.64 | 1,020 | 8.64 | 1,020 | 8.64 | 1,020 |
| Total a.s. use | 16 | 54 | 14 | 1,046 | 18 | 1,088 | *-* | *-* |
| Grassland | Number of a.s. allowed | 4 | 8 | 2 | 7 | 5 | 8 | 5 | 11 |
| Max. recommend annual rate | 1.08 | 1.44 | 1.08 | 1.80 | 1.08 | 1.44 | 1.08 | 1.80 |
| Total a.s. use | 2 | 4 | 1 | 6 | 2 | 4 | *-* | *-* |
| Maize | Number of a.s. allowed | 11 | 21 | 7 | 18 | 12 | 23 | 12 | 24 |
| Max. recommend annual rate | 2.16 | 2.16 | 2.16 | 2.16 | 2.16 | 2.16 | 2.16 | 2.16 |
| Total a.s. use | 6 | 8 | 6 | 7 | 8 | 9 | *-* | *-* |
| Non-Permanent Industrial crops | Number of a.s. allowed | 10 | 28 | 7 | 18 | 11 | 32 | 13 | 39 |
| Max. recommend annual rate | 3.00 | 3.00 | 2.16 | 2.40 | 2.16 | 2.40 | 3.00 | 3.00 |
| Total a.s. use | 7 | 18 | 5 | 11 | 7 | 19 | *-* | *-* |
| Permanent crops | Number of a.s. allowed | 5 | 29 | 2 | 9 | 6 | 39 | 6 | 40 |
| Max. recommend annual rate | 12.50 | 12.50 | 8.64 | 16.38 | 10.00 | 94.80 | 12.50 | 94.80 |
| Total a.s. use | 24 | 60 | 9 | 45 | 22 | 157 | *-* | *-* |
| Root crops | Number of a.s. allowed | 17 | 58 | 9 | 30 | 17 | 64 | 19 | 67 |
| Max. recommend annual rate | 4.00 | 153 | 3.50 | 153 | 4.00 | 153 | 4.00 | 153 |
| Total a.s. use | 14 | 198 | 8 | 178 | 12 | 280 | *-* | *-* |

**Table S14 – Reductions in the number of a.s. and in total a.s. use across the different scenarios.** Reductions refer to corresponding Business As Usual scenario (BAU) figures. Reductions in pesticide input below 50% are marked in red, reductions ≥ 50% in green. The 50% threshold correspond to the pesticide use reduction target of the Farm to Fork Strategy. LDP = Low Dose Pesticides, NH = No Herbicides, FDP = Fast Degradable Pesticides, CFSE = Candidates For Substitution Excluded, LHP = Low Hazard Pesticides, SHH = Safe Human Health, LET = Low Ecosystem Toxicity. No Pesticides scenario was not considered as all reduction in number of pesticides use and pesticide use are of 100%. NEU = Northern Europe, CEU = Central Europe, SEU = Southern Europe. DPVF = dry pulses, vegetables, flowers, NPIC = non-permanent industrial crops, Perm. = permanent, n= number of active substances covered in the respective reduction scenario. Values in bold are presented in Figure 8.

|  | **LDP**  **(n=174)** | | | **NH**  **(n=139)** | | | | **FDP**  **(n=106)** | | | **CFSE**  **(n=181)** | | | **LHP**  **(n=136)** | | | **SHH**  **(n=49)** | | | | | **LET**  **(n=57)** | | | |
| --- | --- | --- | --- | --- | --- | --- | --- | --- | --- | --- | --- | --- | --- | --- | --- | --- | --- | --- | --- | --- | --- | --- | --- | --- | --- |
| **NEU** | **CEU** | **SEU** | **NEU** | **CEU** | | **SEU** | **NEU** | **CEU** | **SEU** | **NEU** | **CEU** | **SEU** | **NEU** | **CEU** | **SEU** | **NEU** | | **CEU** | **SEU** | | **NEU** | **CEU** | | **SEU** |
| **% reduction in the number of pesticides** | | | | | | | | | | | | | | | | | | | | | | | | | |
| Cereals | 13% | 16% | 11% | 39% | 49% | 43% | | 58% | 53% | 61% | 29% | 22% | 25% | 48% | 33% | 47% | 84% | 76% | | | 82% | 74% | | 78% | 72% |
| DPVF | 31% | 43% | 34% | 20% | 33% | 18% | | 51% | 40% | 46% | 14% | 13% | 16% | 43% | 43% | 44% | 71% | 80% | | | 74% | 73% | | 73% | 78% |
| Grapes | 28% | 37% | 27% | 15% | 16% | 13% | | 60% | 42% | 59% | 18% | 16% | 20% | 43% | 32% | 43% | 78% | 79% | | | 80% | 73% | | 68% | 77% |
| Grassland | 25% | 57% | 25% | 100% | 100% | 100% | | 50% | 29% | 50% | 13% | 0% | 13% | 0% | 0% | 0% | 50% | 43% | | | 38% | 50% | | 71% | 38% |
| Maize | 5% | 11% | 9% | 86% | 78% | 83% | | 29% | 33% | 30% | 14% | 17% | 13% | 43% | 44% | 39% | 71% | 67% | | | 70% | 48% | | 61% | 48% |
| NPIC | 29% | 33% | 34% | 68% | 78% | 66% | | 43% | 33% | 50% | 32% | 22% | 34% | 32% | 39% | 31% | 82% | 83% | | | 81% | 64% | | 61% | 66% |
| Perm. Crops | 31% | 56% | 31% | 14% | 11% | 15% | | 52% | 44% | 54% | 21% | 22% | 18% | 55% | 56% | 54% | 79% | 78% | | | 82% | 83% | | 78% | 85% |
| Root crops | 29% | 37% | 30% | 41% | 47% | 38% | | 48% | 30% | 47% | 21% | 20% | 22% | 40% | 50% | 41% | 76% | 80% | | | 78% | 71% | | 70% | 73% |
| Average reduction | 24% | 36% | 25% | 48% | 51% | 47% | | 49% | 38% | 50% | 20% | 16% | 20% | 38% | 35% | 37% | 74% | 73% | | | 73% | 67% | | 70% | 67% |
| **24%** | | | **40%** | | | | **54%** | | | **21%** | | | **41%** | | | **79%** | | | | | **75%** | | | |
| **% reduction in total a.s. use** | | | | | | | | | | | | | | | | | | | | | | | | | |
| Cereals | 60% | 67% | 55% | 52% | 66% | 49% | | 55% | 40% | 49% | 28% | 22% | 22% | 54% | 37% | 60% | 89% | 82% | | | 87% | 61% | | 63% | 55% |
| DPVF | 99% | 99% | 99% | 1% | 2% | 1% | | 2% | 5% | 2% | 51% | 86% | 52% | 94% | 87% | 97% | 95% | 92% | | | 99% | 99% | | 98% | 98% |
| Grapes | 82% | 100% | 99% | 28% | 1% | 1% | | 37% | 1% | 2% | 6% | 98% | 94% | 59% | 98% | 98% | 92% | ~100% | | | 99% | 70% | | 99% | 98% |
| Grassland | 65% | 97% | 63% | 100% | 100% | 100% | | 46% | 25% | 45% | 3% | 0% | 3% | 0% | 0% | 0% | 37% | 73% | | | 35% | 40% | | 80% | 38% |
| Maize | 28% | 45% | 37% | 97% | 95% | 96% | | 16% | 6% | 16% | 7% | 7% | 6% | 49% | 40% | 42% | 93% | 81% | | | 81% | 18% | | 21% | 17% |
| NPIC | 71% | 74% | 72% | 78% | 96% | 88% | | 48% | 39% | 49% | 20% | 30% | 31% | 32% | 47% | 33% | 77% | 83% | | | 85% | 58% | | 57% | 61% |
| Perm. Crops | 91% | 96% | 94% | 21% | 19% | 8% | | 27% | 41% | 72% | 16% | 17% | 6% | 72% | 43% | 28% | 93% | 98% | | | 97% | 59% | | 81% | 86% |
| Root crops | 94% | 97% | 95% | 9% | 7% | 6% | | 8% | 4% | 33% | 82% | 91% | 60% | 87% | 93% | 64% | 96% | 98% | | | 97% | 93% | | 96% | 96% |
| Average reduction  Overall reduction | 74% | 84% | 77% | 48% | 48% | 44% | | 30% | 20% | 34% | 27% | 44% | 34% | 56% | 56% | 53% | 84% | 88% | | | 85% | 62% | | 74% | 69% |
| **77%** | | | **47%** | | | | **28%** | | | **35%** | | | **55%** | | | **86%** | | | | | **68%** | | | |

**Table S15 – Ecotoxicological profile of the active substances allowed in the Low Dose Pesticides scenario (LDP, n=174) according to PPDB: Pesticide Properties DataBase (*2019*).** The numbers in the table indicate the number of a.s. known to have low, unknown, moderate or high toxicity to a respective organism-endpoint. PPDB toxicity thresholds are defined according to EU guidelines or EU regulatory values. Detailed timescale was provided whenever this information was available. LC = lethal concentration; EC = effect concentration; NOEC = highest no observed effect concentration. Grey highlighted cells show the most represented toxicity class per ecotoxicological endpoint. Blue cells indicate the average number of a.s. considered per hazard score.

| **Hazard score** | **0** | **1** | **2** | **3** |
| --- | --- | --- | --- | --- |
| **Organism – Time scale – Endpoint (exposure route)** | **Low**  **toxicity** | **No data**  **available** | **Moderate**  **toxicity** | **High**  **toxicity** |
| Mammals – acute **–** LC50, survival (oral) | 88 (51%) | 5 (3%) | 68 (39%) | 13 (7%) |
| Mammals **–** long-term **–** NOEC, survival, reproduction or development (dietary) | 0 (0%) | 73 (42%) | 12 (7%) | 89 (51%) |
| Birds **–** acute **–** LC50,  survival (oral) | 63 (36%) | 6 (3%) | 94 (54%) | 11 (6%) |
| Birds **–** long-term **–** LC50, survival (dietary) | 67 (39%) | 31 (18%) | 74 (43%) | 2 (1%) |
| Fish **–** acute 96 hour **–** LC50, survival | 13 (7%) | 4 (2%) | 127 (73%) | 30 (17%) |
| Fish **–** long-term 21 day **–** NOEC, survival, development, growth or behaviour | 23 (13%) | 27 (16%) | 101 (58%) | 23 (13%) |
| Aquatic invertebrates **–** acute 48 hour **–** EC50, immobilisation | 15 (9%) | 6 (3%) | 116 (67%) | 37 (21%) |
| Aquatic invertebrates **–** long-term 21 day **–** NOEC, immobilisation, reproduction or development | 24 (14%) | 19 (11%) | 94 (54%) | 37 (21%) |
| Aquatic plants **–** acute 7 day **–** EC50, growth | 13 (7%) | 66 (38%) | 71 (41%) | 24 (14%) |
| Algae **–** acute 72 hour **–** EC50, growth | 30 (17%) | 6 (3%) | 122 (70%) | 16 (9%) |
| Sediment dwelling organisms **–** Acute 96hour **–** LC50, survival | 8 (5%) | 90 (52%) | 62 (36%) | 14 (8%) |
| Honeybees – acute 48 hour **–** LC50, survival (contact) | 39 (22%) | 6 (3%) | 108 (62%) | 21 (12%) |
| Honeybees – acute 48 hour **–** LC50, survival (oral) | 65 (37%) | 10 (6%) | 80 (46%) | 19 (11%) |
| Terrestrial arthropods other than bees***** – not available **–** LC50, survival | 37 (21%) | 109 (63%) | 8 (5%) | 20 (11%) |
| Earthworms – acute 14 day **–** LC50, survival | 8 (5%) | 6 (3%) | 156 (90%) | 4 (2%) |
| Earthworms – long-term56 day **–** NOEC, survival or reproduction | 9 (5%) | 84 (48%) | 79 (45%) | 2 (1%) |
| Soil macro-organisms other than earthworms****** **–** acute **–** LC50,  survival | 0 (0%) | 170 (98%) | 1 (1%) | 3 (2%) |
| Soil macro-organisms other than earthworms****** – long-term – NOEC, survival or reproduction | 6 (3%) | 158 (91%) | 10 (6%) | 0 (0%) |
| **Average number of a.s. per hazard score** | 28 (16%) | 49 (28%) | 77 (44%) | 20 (12%) |
|  | **No significant**  **adverse effect** | **No data available** | **EC/NOEC value**  **or chronic effect** | |
| Soil micro-organisms – long-term 100 days – Nitrogen mineralisation | 151 (87%) | 22 (13%) | 1 (1%) | |
| Soil micro-organisms – long-term 100 days – Carbon mineralisation | 149 (86%) | 24 (14%) | 1(1%) | |
| **Average number of a.s. per hazard score** | 150 (86%) | 23 (13%) | 1(1%) | |

*****Low-moderate and moderate-high toxicity thresholds were defined as 25 and 50% effect, respectively; ******Data in PPDB is very limited; interpretation of available data was done with earthworms’ thresholds.

**Table S16– Ecotoxicological profile of the active substances allowed in the No Herbicides scenario (NH, n=139) according to PPDB: Pesticide Properties DataBase (*2019*).** The numbers in the table indicate the number of a.s. known to have low, unknown, moderate or high toxicity to a respective organism-endpoint. PPDB toxicity thresholds are defined according to EU guidelines or EU regulatory values. Detailed timescale was provided whenever this information was available. LC = lethal concentration; EC = effect concentration; NOEC = highest no observed effect concentration. Grey highlighted cells show the most represented toxicity class per ecotoxicological endpoint. Blue cells indicate the average number of a.s. considered per hazard score.

| **Hazard score** | **0** | **1** | **2** | **3** |
| --- | --- | --- | --- | --- |
| **Organism – Time scale – Endpoint (exposure route)** | **Low**  **toxicity** | **No data available** | **Moderate**  **toxicity** | **High**  **toxicity** |
| Mammals – acute **–** LC50, survival (oral) | 55 (40%) | 3 (2%) | 66 (47%) | 15 (11%) |
| Mammals **–** long-term **–** NOEC, survival, reproduction or development (dietary) | 0 (0%) | 59 (42%) | 4 (3%) | 76 (55%) |
| Birds **–** acute **–** LC50,  survival (oral) | 41 (29%) | 4 (3%) | 80 (58%) | 14 (10%) |
| Birds **–** long-term **–** LC50, survival (dietary) | 45 (32%) | 24 (17%) | 67 (48%) | 3 (2%) |
| Fish **–** acute 96 hour **–** LC50, survival | 4 (3%) | 1 (1%) | 101 (73%) | 33 (24%) |
| Fish **–** long-term 21 day **–** NOEC, survival, development, growth or behaviour | 4 (3%) | 24 (17%) | 88 (63%) | 23 (17%) |
| Aquatic invertebrates **–** acute 48 hour **–** EC50, immobilisation | 3 (2%) | 2 (1%) | 94 (68%) | 40 (29%) |
| Aquatic invertebrates **–** long-term 21 day **–** NOEC, immobilisation, reproduction or development | 1 (1%) | 20 (14%) | 79 (57%) | 39 (28%) |
| Aquatic plants **–** acute 7 day **–** EC50, growth | 8 (6%) | 78 (56%) | 51 (37%) | 2 (1%) |
| Algae **–** acute 72 hour **–** EC50, growth | 25 (18%) | 2 (1%) | 104 (75%) | 8 (6%) |
| Sediment dwelling organisms **–** Acute 96hour **–** LC50, survival | 2 (1%) | 61 (44%) | 61 (44%) | 15 (11%) |
| Honeybees – acute 48 hour **–** LC50, survival (contact) | 34 (24%) | 5 (4%) | 77 (55%) | 23 (17%) |
| Honeybees – acute 48 hour **–** LC50, survival (oral) | 50 (36%) | 8 (6%) | 60 (43%) | 21 (15%) |
| Terrestrial arthropods other than bees***** – not available **–** LC50, survival | 23 (17%) | 94 (68%) | 5 (4%) | 17 (12%) |
| Earthworms – acute 14 day **–** LC50, survival | 3 (2%) | 5 (4%) | 126 (91%) | 5 (4%) |
| Earthworms – long-term56 day **–** NOEC, survival or reproduction | 10 (7%) | 48 (35%) | 79 (57%) | 2 (1%) |
| Soil macro-organisms other than earthworms****** **–** acute **–** LC50,  survival | 0 (0%) | 134 (96%) | 2 (1%) | 3 (2%) |
| Soil macro-organisms other than earthworms****** – long-term – NOEC, survival or reproduction | 5 (4%) | 123 (88%) | 11 (8%) | 0 (0%) |
| **Average number of a.s. per hazard score** | 17 (13%) | 39 (28%) | 64 (46%) | 19 (14%) |
|  | **No significant**  **adverse effect** | **No data available** | **EC/NOEC value**  **or chronic effect** | |
| Soil micro-organisms – long-term 100 days – Nitrogen mineralisation | 119 (86%) | 18 (13%) | 2 (1%) | |
| Soil micro-organisms – long-term 100 days – Carbon mineralisation | 118 (85%) | 20 (14%) | 1 (1%) | |
| **Average number of a.s. per hazard score** | 119 (85%) | 19 (14%) | 2 (1%) | |

*****Low-moderate and moderate-high toxicity thresholds were defined as 25 and 50% effect, respectively; ******Data in PPDB is very limited; interpretation of available data was done with earthworms’ thresholds.

**Table S17 – Ecotoxicological profile of the active substances allowed in the Fast Degradable Pesticide scenario (FDP, n=106) according to PPDB: Pesticide Properties DataBase (*2019*).** The numbers in the table indicate the number of a.s. known to have low, unknown, moderate or high toxicity to a respective organism-endpoint. PPDB toxicity thresholds are defined according to EU guidelines or EU regulatory values. Detailed timescale was provided whenever this information was available. LC = lethal concentration; EC = effect concentration; NOEC = highest no observed effect concentration. Grey highlighted cells show the most represented toxicity class per ecotoxicological endpoint. Blue cells indicate the average number of a.s. considered per hazard score.

| **Hazard score** | **0** | **1** | **2** | **3** |
| --- | --- | --- | --- | --- |
| **Organism – Time scale – Endpoint (exposure route)** | **Low**  **toxicity** | **No data available** | **Moderate**  **toxicity** | **High**  **toxicity** |
| Mammals – acute **–** LC50, survival (oral) | 48 (45%) | 4 (4%) | 48 (45%) | 6 (6%) |
| Mammals **–** long-term **–** NOEC, survival, reproduction or development (dietary) | 0 (0%) | 40 (38%) | 12 (11%) | 54 (51%) |
| Birds **–** acute **–** LC50,  survival (oral) | 32 (30%) | 4 (4%) | 63 (59%) | 7 (7%) |
| Birds **–** long-term **–** LC50, survival (dietary) | 46 (43%) | 20 (19%) | 38 (36%) | 2 (2%) |
| Fish **–** acute 96 hour **–** LC50, survival | 12 (11%) | 1 (1%) | 80 (75%) | 13 (12%) |
| Fish **–** long-term 21 day **–** NOEC, survival, development, growth or behaviour | 22 (21%) | 16 (15%) | 56 (53%) | 12 (11%) |
| Aquatic invertebrates **–** acute 48 hour **–** EC50, immobilisation | 12 (11%) | 4 (4%) | 73 (69%) | 17 (16%) |
| Aquatic invertebrates **–** long-term 21 day **–** NOEC, immobilisation, reproduction or development | 22 (21%) | 15 (14%) | 49 (46%) | 20 (19%) |
| Aquatic plants **–** acute 7 day **–** EC50, growth | 11 (10%) | 38 (36%) | 41 (39%) | 16 (15%) |
| Algae **–** acute 72 hour **–** EC50, growth | 26 (25%) | 4 (4%) | 69 (65%) | 7 (7%) |
| Sediment dwelling organisms **–** Acute 96hour **–** LC50, survival | 5 (5%) | 74 (70%) | 22 (21%) | 5 (5%) |
| Honeybees – acute 48 hour **–** LC50, survival (contact) | 26 (25%) | 4 (4%) | 65 (61%) | 11 (10%) |
| Honeybees – acute 48 hour **–** LC50, survival (oral) | 42 (40%) | 9 (8%) | 44 (42%) | 11 (10%) |
| Terrestrial arthropods other than bees***** – not available **–** LC50, survival | 25 (24%) | 62 (58%) | 5 (5%) | 14 (13%) |
| Earthworms – acute 14 day **–** LC50, survival | 6 (6%) | 5 (5%) | 92 (87%) | 3 (3%) |
| Earthworms – long-term56 day **–** NOEC, survival or reproduction | 4 (4%) | 61 (58%) | 40 (38%) | 1 (1%) |
| Soil macro-organisms other than earthworms****** **–** acute **–** LC50,  survival | 0 (0%) | 102 (96%) | 2 (2%) | 2 (2%) |
| Soil macro-organisms other than earthworms****** – long-term – NOEC, survival or reproduction | 2 (2%) | 102 (96%) | 2 (2%) | 0 (0%) |
| **Average number of a.s. per hazard score** | 19 (18%) | 31 (30%) | 45 (42%) | 11 (11%) |
|  | **No significant**  **adverse effect** | **No data available** | **EC/NOEC value**  **or chronic effect** | |
| Soil micro-organisms – long-term 100 days – Nitrogen mineralisation | 91 (86%) | 14 (13%) | 1 (1%) | |
| Soil micro-organisms – long-term 100 days – Carbon mineralisation | 89 (84%) | 15 (14%) | 2 (2%) | |
| **Average number of a.s. per hazard score** | 90 (85%) | 15 (14%) | 2 (1%) | |

*****Low-moderate and moderate-high toxicity thresholds were defined as 25 and 50% effect, respectively; ******Data in PPDB is very limited; interpretation of available data was done with earthworms’ thresholds.

**Table S18 – Ecotoxicological profile of the active substances still likely to be found in the environment after the pesticide use stop in the Total Pesticide Ban scenario (TPB, n=60) according to PPDB: Pesticide Properties DataBase (2019).** The numbers in the table indicate the number of a.s. known to have low, unknown, moderate or high toxicity to a respective organism-endpoint. PPDB toxicity thresholds are defined according to EU guidelines or EU regulatory values. Detailed timescale was provided whenever this information was available. LC = lethal concentration; EC = effect concentration; NOEC = highest no observed effect concentration. Grey highlighted cells show the most represented toxicity class per ecotoxicological endpoint. Blue cells indicate the average number of a.s. considered per hazard score.

| **Hazard score** | **0** | **1** | **2** | **3** |
| --- | --- | --- | --- | --- |
| **Organism – Time scale – Endpoint (exposure route)** | **Low**  **toxicity** | **No data available** | **Moderate**  **toxicity** | **High**  **toxicity** |
| Mammals – acute **–** LC50, survival (oral) | 27 (45%) | 2 (3%) | 27 (45%) | 4 (7%) |
| Mammals **–** long-term **–** NOEC, survival, reproduction or development (dietary) | 0 (0%) | 28 (47%) | 0 (0%) | 32 (53%) |
| Birds **–** acute **–** LC50,  survival (oral) | 19 (32%) | 3 (5%) | 35 (58%) | 3 (5%) |
| Birds **–** long-term **–** LC50, survival (dietary) | 16 (27%) | 11 (18%) | 32 (53%) | 1 (2%) |
| Fish **–** acute 96 hour **–** LC50, survival | 1 (2%) | 3 (5%) | 44 (73%) | 12 (20%) |
| Fish **–** long-term 21 day **–** NOEC, survival, development, growth or behaviour | 0 (0%) | 9 (15%) | 44 (73%) | 7 (12%) |
| Aquatic invertebrates **–** acute 48 hour **–** EC50, immobilisation | 2 (3%) | 3 (5%) | 42 (70%) | 13 (22%) |
| Aquatic invertebrates **–** long-term 21 day **–** NOEC, immobilisation, reproduction or development | 1 (2%) | 7 (12%) | 44 (73%) | 8 (13%) |
| Aquatic plants **–** acute 7 day **–** EC50, growth | 3 (5%) | 26 (43%) | 29 (48%) | 2 (3%) |
| Algae **–** acute 72 hour **–** EC50, growth | 5 (8%) | 2 (3%) | 47 (78%) | 6 (10%) |
| Sediment dwelling organisms **–** Acute 96hour **–** LC50, survival | 1 (2%) | 22 (37%) | 31 (52%) | 6 (10%) |
| Honeybees – acute 48 hour **–** LC50, survival (contact) | 17 (28%) | 3 (5%) | 35 (58%) | 5 (8%) |
| Honeybees – acute 48 hour **–** LC50, survival (oral) | 22 (37%) | 3 (5%) | 30 (50%) | 5 (8%) |
| Terrestrial arthropods other than bees***** – not available **–** LC50, survival | 13 (22%) | 41 (68%) | 1 (2%) | 5 (8%) |
| Earthworms – acute 14 day **–** LC50, survival | 0 (0%) | 3 (5%) | 56 (93%) | 1 (2%) |
| Earthworms – long-term56 day **–** NOEC, survival or reproduction | 5 (8%) | 18 (30%) | 36 (60%) | 1 (2%) |
| Soil macro-organisms other than earthworms****** **–** acute **–** LC50,  survival | 0 (0%) | 60 (100%) | 0 (0%) | 0 (0%) |
| Soil macro-organisms other than earthworms****** – long-term – NOEC, survival or reproduction | 5 (8%) | 47 (78%) | 8 (13%) | 0 (0%) |
| **Average number of a.s. per hazard score** | 8 (13%) | 16 (27%) | 30 (50%) | 6 (10%) |
|  | **No significant**  **adverse effect** | **No data available** | **EC/NOEC value**  **or chronic effect** | |
| Soil micro-organisms – long-term 100 days – Nitrogen mineralisation | 51 (85%) | 8 (13%) | 1 (2%) | |
| Soil micro-organisms – long-term 100 days – Carbon mineralisation | 52 (87%) | 8 (13%) | 0 (0%) | |
| **Average number of a.s. per hazard score** | 52 (86%) | 8 (13%) | 1 (3%) | |

*****Low-moderate and moderate-high toxicity thresholds were defined as 25 and 50% effect, respectively; ******Data in PPDB is very limited; interpretation of available data was done with earthworms’ thresholds.

**Table S19 – Ecotoxicological profile of the active substances allowed in the Candidates For Substitution Excluded scenario (CFSE, n=181) according to PPDB: Pesticide Properties DataBase (2019).** The numbers in the table indicate the number of a.s. known to have low, unknown, moderate or high toxicity to a respective organism-endpoint. PPDB toxicity thresholds are defined according to EU guidelines or EU regulatory values. Detailed timescale was provided whenever this information was available. LC = lethal concentration; EC = effect concentration; NOEC = highest no observed effect concentration. Grey highlighted cells show the most represented toxicity class per ecotoxicological endpoint. Blue cells indicate the average number of a.s. considered per hazard score.

| **Hazard score** | **0** | **1** | **2** | **3** |
| --- | --- | --- | --- | --- |
| **Organism – Time scale – Endpoint (exposure route)** | **Low**  **toxicity** | **No data**  **available** | **Moderate**  **toxicity** | **High**  **toxicity** |
| Mammals – acute **–** LC50, survival (oral) | 90 (50%) | 7 (4%) | 76 (42%) | 8 (4%) |
| Mammals **–** long-term **–** NOEC, survival, reproduction or development (dietary) | 0 (0%) | 81 (45%) | 14 (8%) | 86 (48%) |
| Birds **–** acute **–** LC50,  survival (oral) | 61 (34%) | 8 (4%) | 106 (59%) | 6 (3%) |
| Birds **–** long-term **–** LC50, survival (dietary) | 65 (36%) | 41 (23%) | 74 (41%) | 1 (1%) |
| Fish **–** acute 96 hour **–** LC50, survival | 13 (7%) | 3 (2%) | 140 (77%) | 25 (14%) |
| Fish **–** long-term 21 day **–** NOEC, survival, development, growth or behaviour | 27 (15%) | 34 (19%) | 102 (56%) | 18 (10%) |
| Aquatic invertebrates **–** acute 48 hour **–** EC50, immobilisation | 14 (8%) | 6 (3%) | 132 (73%) | 29 (16%) |
| Aquatic invertebrates **–** long-term 21 day **–** NOEC, immobilisation, reproduction or development | 25 (14%) | 26 (14%) | 100 (55%) | 30 (17%) |
| Aquatic plants **–** acute 7 day **–** EC50, growth | 18 (10%) | 69 (38%) | 75 (41%) | 19 (10%) |
| Algae **–** acute 72 hour **–** EC50, growth | 40 (22%) | 7 (4%) | 122 (67%) | 12 (7%) |
| Sediment dwelling organisms **–** Acute 96hour **–** LC50, survival | 8 (4%) | 101 (56%) | 61 (34%) | 11 (6%) |
| Honeybees – acute 48 hour **–** LC50, survival (contact) | 42 (23%) | 9 (5%) | 114 (63%) | 16 (9%) |
| Honeybees – acute 48 hour **–** LC50, survival (oral) | 67 (37%) | 15 (8%) | 85 (47%) | 14 (8%) |
| Terrestrial arthropods other than bees***** – not available **–** LC50, survival | 41 (23%) | 115 (64%) | 6 (3%) | 19 (10%) |
| Earthworms – acute 14 day **–** LC50, survival | 8 (4%) | 8 (4%) | 161 (89%) | 4 (2%) |
| Earthworms – long-term56 day **–** NOEC, survival or reproduction | 12 (7%) | 84 (46%) | 84 (46%) | 1 (1%) |
| Soil macro-organisms other than earthworms****** **–** acute **–** LC50,  survival | 0 (0%) | 177 (98%) | 2 (1%) | 2 (1%) |
| Soil macro-organisms other than earthworms****** – long-term – NOEC, survival or reproduction | 4 (2%) | 167 (92%) | 10 (6%) | 0 (0%) |
| **Average number of a.s. per hazard score** | 30 (16%) | 53 (29%) | 81 (45%) | 17 (9%) |
|  | **No significant**  **adverse effect** | **No data available** | **EC/NOEC value**  **or chronic effect** | |
| Soil micro-organisms – long-term 100 days – Nitrogen mineralisation | 150 (83%) | 30 (16%) | 1 (1%) | |
| Soil micro-organisms – long-term 100 days – Carbon mineralisation | 148 (82%) | 32 (18%) | 1 (1%) | |
| **Average number of a.s. per hazard score** | 149 (82%) | 31 (17%) | 1 (1%) | |

*****Low-moderate and moderate-high toxicity thresholds were defined as 25 and 50% effect, respectively; ******Data in PPDB is very limited; interpretation of available data was done with earthworms’ thresholds.

**Table S20 – Ecotoxicological profile of the active substances allowed in the Low Hazard Pesticides scenario (LHP, n=136) according to PPDB: Pesticide Properties DataBase (2019).** The numbers in the table indicate the number of a.s. known to have low, unknown, moderate or high toxicity to a respective organism-endpoint. PPDB toxicity thresholds are defined according to EU guidelines or EU regulatory values. Detailed timescale was provided whenever this information was available. LC = lethal concentration; EC = effect concentration; NOEC = highest no observed effect concentration. Grey highlighted cells show the most represented toxicity class per ecotoxicological endpoint. Blue cells indicate the average number of a.s. considered per hazard score.

| **Hazard score** | **0** | **1** | **2** | **3** |
| --- | --- | --- | --- | --- |
| **Organism – Time scale – Endpoint (exposure route)** | **Low**  **toxicity** | **No data**  **available** | **Moderate**  **toxicity** | **High**  **toxicity** |
| Mammals – acute **–** LC50, survival (oral) | 78 (57%) | 8 (6%) | 49 (36%) | 1 (1%) |
| Mammals **–** long-term **–** NOEC, survival, reproduction or development (dietary) | 0 (0%) | 68 (50%) | 12 (9%) | 56 (41%) |
| Birds **–** acute **–** LC50,  survival (oral) | 53 (39%) | 8 (6%) | 74 (54%) | 1 (1%) |
| Birds **–** long-term **–** LC50, survival (dietary) | 54 (40%) | 35 (26%) | 47 (35%) | 0 (0%) |
| Fish **–** acute 96 hour **–** LC50, survival | 13 (10%) | 4 (3%) | 109 (80%) | 10 (7%) |
| Fish **–** long-term 21 day **–** NOEC, survival, development, growth or behaviour | 26 (19%) | 26 (19%) | 77 (57%) | 7 (5%) |
| Aquatic invertebrates **–** acute 48 hour **–** EC50, immobilisation | 13 (10%) | 5 (4%) | 106 (78%) | 12 (9%) |
| Aquatic invertebrates **–** long-term 21 day **–** NOEC, immobilisation, reproduction or development | 28 (21%) | 20 (15%) | 77 (57%) | 11 (8%) |
| Aquatic plants **–** acute 7 day **–** EC50, growth | 16 (12%) | 44 (32%) | 58 (43%) | 18 (13%) |
| Algae **–** acute 72 hour **–** EC50, growth | 35 (26%) | 5 (4%) | 84 (62%) | 12 (9%) |
| Sediment dwelling organisms **–** Acute 96hour **–** LC50, survival | 7 (5%) | 84 (62%) | 42 (31%) | 3 (2%) |
| Honeybees – acute 48 hour **–** LC50, survival (contact) | 41 (30%) | 9 (7%) | 83 (61%) | 3 (2%) |
| Honeybees – acute 48 hour **–** LC50, survival (oral) | 58 (43%) | 15 (11%) | 61 (45%) | 2 (1%) |
| Terrestrial arthropods other than bees***** – not available **–** LC50, survival | 38 (28%) | 85 (63%) | 2 (1%) | 11 (8%) |
| Earthworms – acute 14 day **–** LC50, survival | 5 (4%) | 8 (6%) | 122 (90%) | 1 (1%) |
| Earthworms – long-term56 day **–** NOEC, survival or reproduction | 11 (8%) | 69 (51%) | 55 (40%) | 1 (1%) |
| Soil macro-organisms other than earthworms****** **–** acute **–** LC50,  survival | 0 (0%) | 134 (99%) | 1 (1%) | 1 (1%) |
| Soil macro-organisms other than earthworms****** – long-term – NOEC, survival or reproduction | 6 (4%) | 126 (93%) | 4 (3%) | 0 (0%) |
| **Average number of a.s. per hazard score** | 27 (20%) | 42 (31%) | 59 (43%) | 8 (6%) |
|  | **No significant**  **adverse effect** | **No data available** | **EC/NOEC value**  **or chronic effect** | |
| Soil micro-organisms – long-term 100 days – Nitrogen mineralisation | 111 (82%) | 24 (18%) | 1 (<1%) | |
| Soil micro-organisms – long-term 100 days – Carbon mineralisation | 110 (81%) | 25 (18%) | 1 (<1%) | |
| **Average number of a.s. per hazard score** | 111 (82%) | 25 (18%) | 1 (<1%) | |

*****Low-moderate and moderate-high toxicity thresholds were defined as 25 and 50% effect, respectively; ******Data in PPDB is very limited; interpretation of available data was done with earthworms’ thresholds.

**Table S21 – Ecotoxicological profile of the active substances allowed in the Safe Human Health scenario (SHH, n=49) according to PPDB: Pesticide Properties DataBase (*2019*).** The numbers in the table indicate the number of a.s. known to have low, unknown, moderate or high toxicity to a respective organism-endpoint. PPDB toxicity thresholds are defined according to EU guidelines or EU regulatory values. Detailed timescale was provided whenever this information was available. LC = lethal concentration; EC = effect concentration; NOEC = highest no observed effect concentration. Grey highlighted cells show the most represented toxicity class per ecotoxicological endpoint. Blue cells indicate the average number of a.s. considered per hazard score.

| **Hazard score** | **0** | **1** | **2** | **3** |
| --- | --- | --- | --- | --- |
| **Organism – Time scale – Endpoint (exposure route)** | **Low**  **toxicity** | **No data**  **available** | **Moderate**  **toxicity** | **High**  **toxicity** |
| Mammals – acute **–** LC50, survival (oral) | 26 (53%) | 1 (2%) | 20 (41%) | 2 (4%) |
| Mammals **–** long-term **–** NOEC, survival, reproduction or development (dietary) | 0 (0%) | 24 (49%) | 4 (8%) | 21 (43%) |
| Birds **–** acute **–** LC50,  survival (oral) | 16 (33%) | 0 (0%) | 31 (63%) | 2 (4%) |
| Birds **–** long-term **–** LC50, survival (dietary) | 22 (45%) | 10 (20%) | 17 (35%) | 0 (0%) |
| Fish **–** acute 96 hour **–** LC50, survival | 4 (8%) | 0 (0%) | 40 (82%) | 5 (10%) |
| Fish **–** long-term 21 day **–** NOEC, survival, development, growth or behaviour | 9 (18%) | 6 (12%) | 29 (59%) | 5 (10%) |
| Aquatic invertebrates **–** acute 48 hour **–** EC50, immobilisation | 6 (12%) | 0 (0%) | 34 (69%) | 9 (18%) |
| Aquatic invertebrates **–** long-term 21 day **–** NOEC, immobilisation, reproduction or development | 12 (24%) | 4 (8%) | 25 (51%) | 8 (16%) |
| Aquatic plants **–** acute 7 day **–** EC50, growth | 7 (14%) | 9 (18%) | 25 (51%) | 8 (16%) |
| Algae **–** acute 72 hour **–** EC50, growth | 15 (31%) | 1 (2%) | 27 (55%) | 6 (12%) |
| Sediment dwelling organisms **–** Acute 96hour **–** LC50, survival | 3 (6%) | 28 (57%) | 15 (31%) | 3 (6%) |
| Honeybees – acute 48 hour **–** LC50, survival (contact) | 14 (29%) | 0 (0%) | 32 (65%) | 3 (6%) |
| Honeybees – acute 48 hour **–** LC50, survival (oral) | 20 (41%) | 4 (8%) | 23 (47%) | 2 (4%) |
| Terrestrial arthropods other than bees***** – not available **–** LC50, survival | 11 (22%) | 30 (61%) | 3 (6%) | 5 (10%) |
| Earthworms – acute 14 day **–** LC50, survival | 1 (2%) | 2 (4%) | 45 (92%) | 1 (2%) |
| Earthworms – long-term56 day **–** NOEC, survival or reproduction | 5 (10%) | 18 (37%) | 25 (51%) | 1 (2%) |
| Soil macro-organisms other than earthworms****** **–** acute **–** LC50,  survival | 0 (0%) | 48 (98%) | 0 (0%) | 1 (2%) |
| Soil macro-organisms other than earthworms****** – long-term – NOEC, survival or reproduction | 1 (2%) | 47 (96%) | 1 (2%) | 0 (0%) |
| **Average number of a.s. per hazard score** | 10 (20%) | 13 (26%) | 22 (45%) | 5 (9%) |
|  | **No significant**  **adverse effect** | **No data available** | **EC/NOEC value**  **or chronic effect** | |
| Soil micro-organisms – long-term 100 days – Nitrogen mineralisation | 45 (92%) | 4 (8%) | 0 (0%) | |
| Soil micro-organisms – long-term 100 days – Carbon mineralisation | 44 (90%) | 5 (10%) | 0 (0%) | |
| **Average number of a.s. per hazard score** | 45 (91%) | 5 (9%) | 0 (0%) | |

*****Low-moderate and moderate-high toxicity thresholds were defined as 25 and 50% effect, respectively; ******Data in PPDB is very limited; interpretation of available data was done with earthworms’ thresholds.

**Table S22 – Ecotoxicological profile of the active substances allowed in the Low Ecosystem Toxicity scenario (LET, n=57) according to PPDB: Pesticide Properties DataBase (2019).** The numbers in the table indicate the number of a.s. known to have low, unknown, moderate or high toxicity to a respective organism-endpoint. PPDB toxicity thresholds are defined according to EU guidelines or EU regulatory values. Detailed timescale was provided whenever this information was available. LC = lethal concentration; EC = effect concentration; NOEC = highest no observed effect concentration. Grey highlighted cells show the most represented toxicity class per ecotoxicological endpoint. Blue cells indicate the average number of a.s. considered per hazard score.

| **Hazard score** | **0** | **1** | **2** | **3** |
| --- | --- | --- | --- | --- |
| **Organism – Time scale – Endpoint (exposure route)** | **Low**  **toxicity** | **No data**  **available** | **Moderate**  **toxicity** | **High**  **toxicity** |
| Mammals – acute **–** LC50, survival (oral) | 28 (49%) | 0 (0%) | 29 (51%) | 0 (0%) |
| Mammals **–** long-term **–** NOEC, survival, reproduction or development (dietary) | 0 (0%) | 14 (25%) | 4 (7%) | 39 (68%) |
| Birds **–** acute **–** LC50,  survival (oral) | 16 (28%) | 0 (0%) | 41 (72%) | 0 (0%) |
| Birds **–** long-term **–** LC50, survival (dietary) | 27 (47%) | 0 (0%) | 30 (53%) | 0 (0%) |
| Fish **–** acute 96 hour **–** LC50, survival | 4 (7%) | 0 (0%) | 53 (93%) | 0 (0%) |
| Fish **–** long-term 21 day **–** NOEC, survival, development, growth or behaviour | 10 (18%) | 1 (2%) | 46 (81%) | 0 (0%) |
| Aquatic invertebrates **–** acute 48 hour **–** EC50, immobilisation | 4 (7%) | 0 (0%) | 53 (93%) | 0 (0%) |
| Aquatic invertebrates **–** long-term 21 day **–** NOEC, immobilisation, reproduction or development | 15 (26%) | 1 (2%) | 41 (72%) | 0 (0%) |
| Aquatic plants **–** acute 7 day **–** EC50, growth | 10 (18%) | 1 (2%) | 46 (81%) | 0 (0%) |
| Algae **–** acute 72 hour **–** EC50, growth | 16 (28%) | 0 (0%) | 41 (72%) | 0 (0%) |
| Sediment dwelling organisms **–** Acute 96hour **–** LC50, survival | 4 (7%) | 34 (60%) | 19 (33%) | 0 (0%) |
| Honeybees – acute 48 hour **–** LC50, survival (contact) | 16 (28%) | 0 (0%) | 41 (72%) | 0 (0%) |
| Honeybees – acute 48 hour **–** LC50, survival (oral) | 20 (35%) | 1 (2%) | 36 (63%) | 0 (0%) |
| Terrestrial arthropods other than bees***** – not available **–** LC50, survival | 15 (26%) | 31 (54%) | 2 (4%) | 9 (16%) |
| Earthworms – acute 14 day **–** LC50, survival | 3 (5%) | 1 (2%) | 53 (93%) | 0 (0%) |
| Earthworms – long-term56 day **–** NOEC, survival or reproduction | 3 (5%) | 24 (42%) | 29 (51%) | 1 (2%) |
| Soil macro-organisms other than earthworms****** **–** acute **–** LC50,  survival | 0 (0%) | 55 (96%) | 1 (2%) | 1 (2%) |
| Soil macro-organisms other than earthworms****** – long-term – NOEC, survival or reproduction | 0 (0%) | 53 (93%) | 4 (7%) | 0 (0%) |
| **Average number of a.s. per hazard score** | 11 (19%) | 12 (21%) | 32 (55%) | 3 (5%) |
|  | **No significant**  **adverse effect** | **No data available** | **EC/NOEC value**  **or chronic effect** | |
| Soil micro-organisms – long-term 100 days – Nitrogen mineralisation | 56 (98%) | 1 (2%) | 0 (0%) | |
| Soil micro-organisms – long-term 100 days – Carbon mineralisation | 56 (98%) | 1 (2%) | 0 (0%) | |
| **Average number of a.s. per hazard score** | 56 (98%) | 1 (2%) | 0 (0%) | |

*****Low-moderate and moderate-high toxicity thresholds were defined as 25 and 50% effect, respectively; ******Data in PPDB is very limited; interpretation of available data was done with earthworms’ thresholds.

**Table S23 – Human health problems associated with the active substances allowed in the Low Dose Pesticides scenario (LDP, n=174), according to PPDB (2019).** The numbers in the table indicate the number of active substances known to cause the respective problem, known to not cause the problem, with status not identified or no data available. Grey highlighted cells show the most represented class per endpoint. Blue cells indicate the average number of a.s. considered per hazard score (the 11 human endpoints considered).

| **Hazard scores** | **0** | **1** | **2** | **3** |
| --- | --- | --- | --- | --- |
| **Effect**  **Endpoint** | **No**  **(known to not cause a problem)** | **Unknown**  **(no data**  **found)** | **Possibly (status not identified)** | **Yes**  **(known to cause a problem)** |
| Carcinogen | 102 (59%) | 9 (5%) | 59 (34%) | 4 (2%) |
| Mutagen | 83 (48%) | 83 (48%) | 8 (5%) | 0 (0%) |
| Endocrine distruptor | 42 (24%) | 97 (56%) | 27 (16%) | 8 (5%) |
| Reproduction/development effects | 35 (20%) | 13 (7%) | 85 (49%) | 41 (24%) |
| Acetyl cholinesterase inhibitor | 147 (84%) | 17 (10%) | 3 (2%) | 7 (4%) |
| Neurotoxicant | 106 (61%) | 32 (18%) | 22 (13%) | 14 (8%) |
| Respiratory tract irritant | 58 (33%) | 70 (40%) | 9 (5%) | 37 (21%) |
| Skin irritant | 104 (60%) | 10 (6%) | 23 (13%) | 37 (21%) |
| Skin sensitiser | 24 (14%) | 108 (62%) | 14 (8%) | 28 (16%) |
| Eye irritant | 84 (48%) | 10 (6%) | 19 (11%) | 61 (35%) |
| Phototoxicant | 23 (13%) | 148 (85%) | 2 (1%) | 1 (1%) |
| **Average number of a.s. per hazard score** | 73 (53%) | 54 (39%) | 25 (18%) | 22 (16%) |

**Table S24 – Human health problems associated with the active substances allowed in the No Herbicides scenario (NH, n=139), according to PPDB (2019).** The numbers in the table indicate the number of active substances known to cause the respective problem, known to not cause the problem, with status not identified or no data available. Grey highlighted cells show the most represented class per endpoint. Blue cells indicate the average number of a.s. considered per hazard score (the 11 human endpoints considered).

| **Hazard scores** | **0** | **1** | **2** | **3** |
| --- | --- | --- | --- | --- |
| **Effect**  **Endpoint** | **No**  **(known to not cause a problem)** | **Unknown**  **(no data**  **found)** | **Possibly (status not identified)** | **Yes**  **(known to cause a problem)** |
| Carcinogen | 78 (56%) | 4 (3%) | 50 (36%) | 7 (5%) |
| Mutagen | 55 (40%) | 71 (51%) | 10 (7%) | 3 (2%) |
| Endocrine distruptor | 36 (26%) | 65 (47%) | 32 (23%) | 6 (4%) |
| Reproduction/development effects | 25 (18%) | 11 (8%) | 66 (47%) | 37 (27%) |
| Acetyl cholinesterase inhibitor | 111 (80%) | 14 (10%) | 4 (3%) | 10 (7%) |
| Neurotoxicant | 88 (63%) | 17 (12%) | 23 (17%) | 11 (8%) |
| Respiratory tract irritant | 48 (35%) | 57 (41%) | 9 (6%) | 25 (18%) |
| Skin irritant | 82 (59%) | 5 (4%) | 18 (13%) | 34 (24%) |
| Skin sensitiser | 17 (12%) | 79 (57%) | 16 (12%) | 27 (19%) |
| Eye irritant | 68 (49%) | 5 (4%) | 20 (14%) | 46 (33%) |
| Phototoxicant | 19 (14%) | 117 (84%) | 2 (1%) | 1 (1%) |
| **Average number of a.s. per hazard score** | 57 (41%) | 40 (29%) | 23 (16%) | 19 (14%) |

**Table S25 – Human health problems associated with the active substances allowed in the Fast Degradable Pesticides (FDP, n=106), according to PPDB.** The numbers in the table indicate the number of active substances known to cause the respective problem, known to not cause the problem, with status not identified or no data available. Grey highlighted cells show the most represented class per endpoint. Blue cells indicate the average number of a.s. considered per hazard score (the 11 human endpoints considered).

| **Hazard scores** | **0** | **1** | **2** | **3** |
| --- | --- | --- | --- | --- |
| **Effect**  **Endpoint** | **No**  **(known to not cause a problem)** | **Unknown**  **(no data**  **found)** | **Possibly (status not identified)** | **Yes**  **(known to cause a problem)** |
| Carcinogen | 61 (58%) | 7 (7%) | 36 (34%) | 2 (2%) |
| Mutagen | 49 (46%) | 48 (45%) | 6 (6%) | 3 (3%) |
| Endocrine distruptor | 28 (26%) | 58 (55%) | 18 (17%) | 2 (2%) |
| Reproduction/development effects | 23 (22%) | 15 (14%) | 41 (39%) | 27 (25%) |
| Acetyl cholinesterase inhibitor | 90 (85%) | 4 (4%) | 5 (5%) | 7 (7%) |
| Neurotoxicant | 64 (60%) | 18 (17%) | 15 (14%) | 9 (8%) |
| Respiratory tract irritant | 33 (31%) | 41 (39%) | 6 (6%) | 26 (25%) |
| Skin irritant | 53 (50%) | 6 (6%) | 12 (11%) | 35 (33%) |
| Skin sensitiser | 17 (16%) | 50 (47%) | 11 (10%) | 28 (26%) |
| Eye irritant | 40 (38%) | 6 (6%) | 8 (8%) | 52 (49%) |
| Phototoxicant | 23 (22%) | 81 (76%) | 2 (2%) | 0 (0%) |
| **Average number of a.s. per hazard score** | 44 (41%) | 30 (29%) | 15 (14%) | 17 (16%) |

**Table S26 – Human health problems associated with the active substances still likely to be found in the environment after a possible/planned pesticide use stop in the Total Pesticide Ban scenario (TPB, n=60), according to PPDB.** The numbers in the table indicate the number of active substances known to cause the respective problem, known to not cause the problem, with status not identified or no data available. Grey highlighted cells show the most represented class per endpoint. Blue cells indicate the average number of a.s. considered per hazard score (the 11 human endpoints considered).

| **Hazard scores** | **0** | **1** | **2** | **3** |
| --- | --- | --- | --- | --- |
| **Effect**  **Endpoint** | **No**  **(known to not cause a problem)** | **Unknown**  **(no data**  **found)** | **Possibly (status not identified)** | **Yes**  **(known to cause a problem)** |
| Carcinogen | 30 (50%) | 2 (3%) | 24 (40%) | 4 (7%) |
| Mutagen | 23 (38%) | 31 (52%) | 6 (10%) | 0 (0%) |
| Endocrine distruptor | 11 (18%) | 32 (53%) | 13 (22%) | 4 (7%) |
| Reproduction/development effects | 5 (8%) | 4 (7%) | 36 (60%) | 15 (25%) |
| Acetyl cholinesterase inhibitor | 49 (82%) | 11 (18%) | 0 (0%) | 0 (0%) |
| Neurotoxicant | 41 (68%) | 10 (17%) | 7 (12%) | 2 (3%) |
| Respiratory tract irritant | 19 (32%) | 24 (40%) | 5 (8%) | 12 (20%) |
| Skin irritant | 43 (72%) | 4 (7%) | 6 (10%) | 7 (12%) |
| Skin sensitiser | 8 (13%) | 40 (67%) | 4 (7%) | 8 (13%) |
| Eye irritant | 35 (58%) | 4 (7%) | 7 (12%) | 14 (23%) |
| Phototoxicant | 4 (7%) | 54 (90%) | 1 (2%) | 1 (2%) |
| **Average number of a.s. per hazard score** | 24 (41%) | 20 (33%) | 10 (17%) | 6 (10%) |

**Table S27 – Human health problems associated with the active substances allowed in the Candidates For Substitution Excluded scenario (CFSE, n=181), according to PPDB.** The numbers in the table indicate the number of active substances known to cause the respective problem, known to not cause the problem, with status not identified or no data available. Grey highlighted cells show the most represented class per endpoint. Blue cells indicate the average number of a.s. considered per hazard score (the 11 human endpoints considered).

| **Hazard scores** | **0** | **1** | **2** | **3** |
| --- | --- | --- | --- | --- |
| **Effect**  **Endpoint** | **No**  **(known to not cause a problem)** | **Unknown**  **(no data**  **found)** | **Possibly (status not identified)** | **Yes**  **(known to cause a problem)** |
| Carcinogen | 101 (56%) | 10 (6%) | 62 (34%) | 8 (4%) |
| Mutagen | 82 (45%) | 89 (49%) | 9 (5%) | 1 (1%) |
| Endocrine distruptor | 44 (24%) | 100 (55%) | 31 (17%) | 6 (3%) |
| Reproduction/development effects | 43 (24%) | 13 (7%) | 82 (45%) | 43 (24%) |
| Acetyl cholinesterase inhibitor | 152 (84%) | 18 (10%) | 6 (3%) | 5 (3%) |
| Neurotoxicant | 112 (62%) | 33 (18%) | 23 (13%) | 13 (7%) |
| Respiratory tract irritant | 60 (33%) | 72 (40%) | 12 (7%) | 37 (20%) |
| Skin irritant | 110 (61%) | 6 (3%) | 17 (9%) | 48 (27%) |
| Skin sensitiser | 25 (14%) | 104 (57%) | 17 (9%) | 35 (19%) |
| Eye irritant | 89 (49%) | 6 (3%) | 21 (12%) | 65 (36%) |
| Phototoxicant | 29 (16%) | 148 (82%) | 3 (2%) | 1 (1%) |
| **Average number of a.s. per hazard score** | 77 (43%) | 54 (30%) | 26 (14%) | 24 (13%) |

**Table S28 – Human health problems associated with the active substances allowed in the Low Hazard Pesticide scenario (LHP, n=136), according to PPDB (2019).** The numbers in the table indicate the number of active substances known to cause the respective problem, known to not cause the problem, with status not identified or no data available. Grey highlighted cells show the most represented class per endpoint. Blue cells indicate the average number of a.s. considered per hazard score (the 11 human endpoints considered).

| **Hazard scores** | **0** | **1** | **2** | **3** |
| --- | --- | --- | --- | --- |
| **Effect**  **Endpoint** | **No**  **(known to not cause a problem)** | **Unknown**  **(no data**  **found)** | **Possibly (status not identified)** | **Yes**  **(known to cause a problem)** |
| Carcinogen | 82 (60%) | 10 (7%) | 36 (26%) | 8 (6%) |
| Mutagen | 74 (54%) | 58 (43%) | 4 (3%) | 0 (0%) |
| Endocrine distruptor | 43 (32%) | 78 (57%) | 13 (10%) | 2 (1%) |
| Reproduction/development effects | 33 (24%) | 9 (7%) | 67 (49%) | 27 (20%) |
| Acetyl cholinesterase inhibitor | 120 (88%) | 13 (10%) | 3 (2%) | 0 (0%) |
| Neurotoxicant | 101 (74%) | 22 (16%) | 10 (7%) | 3 (2%) |
| Respiratory tract irritant | 53 (39%) | 53 (39%) | 11 (8%) | 19 (14%) |
| Skin irritant | 96 (71%) | 7 (5%) | 11 (8%) | 22 (16%) |
| Skin sensitiser | 24 (18%) | 83 (61%) | 9 (7%) | 20 (15%) |
| Eye irritant | 75 (55%) | 7 (5%) | 15 (11%) | 39 (29%) |
| Phototoxicant | 20 (15%) | 112 (82%) | 3 (2%) | 1 (1%) |
| **Average number of a.s. per hazard score** | 66 (48%) | 41 (30%) | 17 (12%) | 13 (9%) |

**Table S29 – Human health problems associated with the active substances allowed in the Safe Human Health (SHH) scenario (n=49), according to PPDB.** The numbers in the table indicate the number of active substances known to cause the respective problem, known to not cause the problem, with status not identified or no data available. Grey highlighted cells show the most represented class per endpoint. Blue cells indicate the average number of a.s. considered per hazard score (the 11 human endpoints considered).

| **Hazard scores** | **0** | **1** | **2** | **3** |
| --- | --- | --- | --- | --- |
| **Effect**  **Endpoint** | **No**  **(known to not cause a problem)** | **Unknown**  **(no data**  **found)** | **Possibly (status not identified)** | **Yes**  **(known to cause a problem)** |
| Carcinogen | 49 (100%) | 0 (0%) | 0 (0%) | 0 (0%) |
| Mutagen | 49 (100%) | 0 (0%) | 0 (0%) | 0 (0%) |
| Endocrine distruptor | 19 (39%) | 26 (53%) | 4 (8%) | 0 (0%) |
| Reproduction/development effects | 13 (27%) | 3 (6%) | 33 (67%) | 0 (0%) |
| Acetyl cholinesterase inhibitor | 43 (88%) | 4 (8%) | 1 (2%) | 1 (2%) |
| Neurotoxicant | 38 (78%) | 6 (12%) | 5 (10%) | 0 (0%) |
| Respiratory tract irritant | 15 (31%) | 17 (35%) | 4 (8%) | 13 (27%) |
| Skin irritant | 34 (69%) | 0 (0%) | 4 (8%) | 11 (22%) |
| Skin sensitiser | 9 (18%) | 27 (55%) | 1 (2%) | 12 (24%) |
| Eye irritant | 24 (49%) | 0 (0%) | 7 (14%) | 18 (37%) |
| Phototoxicant | 11 (22%) | 37 (76%) | 1 (2%) | 0 (0%) |
| **Average number of a.s. per hazard score** | 28 (56%) | 11 (22%) | 5 (11%) | 5 (10%) |

**Table S30 – Human health problems associated with the active substances allowed in the Low Ecosystem Toxicity (LET) scenario (n=57), according to PPDB.** The numbers in the table indicate the number of active substances known to cause the respective problem, known to not cause the problem, with status not identified or no data available. Grey highlighted cells show the most represented class per endpoint. Blue cells indicate the average number of a.s. considered per hazard score (the 11 human endpoints considered).

| **Hazard scores** | **0** | **1** | **2** | **3** |
| --- | --- | --- | --- | --- |
| **Effect**  **Endpoint** | **No**  **(known to not cause a problem)** | **Unknown**  **(no data**  **found)** | **Possibly**  **(status not identified)** | **Yes**  **(known to cause a problem)** |
| Carcinogen | 36 (63%) | 1 (2%) | 20 (35%) | 0 (0%) |
| Mutagen | 31 (54%) | 21 (37%) | 4 (7%) | 1 (2%) |
| Endocrine distruptor | 16 (28%) | 30 (53%) | 10 (18%) | 1 (2%) |
| Reproduction/development effects | 12 (21%) | 3 (5%) | 28 (49%) | 14 (25%) |
| Acetyl cholinesterase inhibitor | 50 (88%) | 4 (7%) | 3 (5%) | 0 (0%) |
| Neurotoxicant | 40 (70%) | 8 (14%) | 6 (11%) | 3 (5%) |
| Respiratory tract irritant | 25 (44%) | 17 (30%) | 3 (5%) | 12 (21%) |
| Skin irritant | 36 (63%) | 0 (0%) | 5 (9%) | 16 (28%) |
| Skin sensitiser | 12 (21%) | 30 (53%) | 3 (5%) | 12 (21%) |
| Eye irritant | 31 (54%) | 0 (0%) | 3 (5%) | 23 (40%) |
| Phototoxicant | 11 (19%) | 45 (79%) | 1 (2%) | 0 (0%) |
| **Average number of a.s. per hazard score** | 27 (48%) | 14 (25%) | 8 (14%) | 7 (13%) |

**Table S31 – Expected reductions in the number (N) of active substances (a.s.) with high or moderate ecotoxicity, and on the number of a.s. known to have effect or possible effect (status not identified) on human toxicity endpoints.** Reductions refer to corresponding Business As Usual scenario N values. Hazard reductions below 50% are marked in red, reductions ≥ 50% in green. The 50% threshold corresponds to the pesticide risk reduction target of the Farm to Fork Strategy. LDP = Low Dose Pesticides, NH = No Herbicides, FDP = Fast Degradable Pesticides, TPB = Total Pesticide Ban, CFSE = Candidates For Substitution Excluded, LHP = Low Hazard Pesticides, SHH = Safe Human Health, LET = Low Ecosystem Toxicity. DPVF = dry pulses, vegetables, flowers, NPIC = non-permanent industrial crops, Perm. = permanent, n = number of a.s. covered in the reduction scenario, Mod. = moderate. Values in bold are presented in Figure 8.

|  | **LDP (n=174)** | | **NH (n=139)** | | **FDP (n=106)** | | **TPB (n=60)** | | **CFSE (n=181)** | | **LHP (n=136)** | | **SHH (n=49)** | | **LET (n=57)** | |
| --- | --- | --- | --- | --- | --- | --- | --- | --- | --- | --- | --- | --- | --- | --- | --- | --- |
| **% reduction in N of a.s. - ecosystem** | **High** | **Mod.** | **High** | **Mod.** | **High** | **Mod.** | **High** | **Mod.** | **High** | **Mod.** | **High** | **Mod.** | **High** | **Mod.** | **High** | **Mod.** |
| Mammals – acute | 13% | 31% | 0% | 33% | 60% | 52% | 73% | 73% | 47% | 23% | 93% | 51% | 87% | 80% | 100% | 71% |
| Mammals **–** short-term | 23% | 25% | 34% | 75% | 53% | 25% | 72% | 100% | 26% | 13% | 52% | 25% | 82% | 75% | 66% | 75% |
| Birds **–** acute | 21% | 30% | 0% | 40% | 50% | 53% | 79% | 74% | 57% | 21% | 93% | 45% | 86% | 77% | 100% | 69% |
| Birds **–** short-term | 33% | 25% | 0% | 32% | 33% | 62% | 67% | 68% | 67% | 25% | 100% | 53% | 100% | 83% | 100% | 70% |
| Fish **–** acute | 12% | 27% | 3% | 42% | 62% | 54% | 65% | 75% | 26% | 20% | 71% | 38% | 85% | 77% | 100% | 70% |
| Fish **–** chronic | 15% | 26% | 15% | 35% | 56% | 59% | 74% | 68% | 33% | 25% | 74% | 43% | 81% | 79% | 100% | 66% |
| Aquatic invertebrates **–** acute | 10% | 30% | 2% | 43% | 59% | 56% | 68% | 75% | 29% | 20% | 71% | 36% | 78% | 79% | 100% | 68% |
| Aquatic invertebrates **–** chronic | 10% | 27% | 5% | 38% | 51% | 62% | 80% | 66% | 27% | 22% | 73% | 40% | 80% | 80% | 100% | 68% |
| Aquatic plants **–** acute | 14% | 24% | 93% | 46% | 43% | 56% | 93% | 69% | 32% | 20% | 36% | 38% | 71% | 73% | 100% | 51% |
| Algae **–** acute | 24% | 21% | 62% | 32% | 67% | 55% | 71% | 69% | 43% | 21% | 43% | 45% | 71% | 82% | 100% | 73% |
| Sediment dwelling organisms **–** acute | 7% | 24% | 0% | 26% | 67% | 73% | 60% | 62% | 27% | 26% | 80% | 49% | 80% | 82% | 100% | 77% |
| Honeybees – acute (contact) | 9% | 24% | 0% | 46% | 52% | 54% | 78% | 75% | 30% | 20% | 87% | 42% | 87% | 77% | 100% | 71% |
| Honeybees – acute (oral) | 10% | 27% | 0% | 45% | 48% | 60% | 76% | 73% | 33% | 23% | 90% | 45% | 90% | 79% | 100% | 67% |
| Other Terrestrial arthropods – not known | 26% | 20% | 37% | 50% | 48% | 50% | 81% | 90% | 30% | 40% | 59% | 80% | 81% | 70% | 67% | 80% |
| Earthworms – acute | 20% | 25% | 0% | 39% | 40% | 56% | 80% | 73% | 20% | 22% | 80% | 41% | 80% | 78% | 100% | 74% |
| Earthworms – chronic | 0% | 28% | 0% | 28% | 50% | 63% | 50% | 67% | 50% | 23% | 50% | 50% | 50% | 77% | 50% | 73% |
| Other Soil macro-organisms **–** acute | 0% | 67% | 0% | 33% | 33% | 33% | 100% | 100% | 33% | 33% | 67% | 67% | 67% | 100% | 67% | 67% |
| Other Soil macro-organisms – chronic |  | 29% |  | 21% |  | 86% |  | 43% |  | 29% |  | 71% |  | 93% |  | 71% |
| Average reduction  Overall hazard reduction | 14% | 28% | 15% | 39% | 51% | 56% | 75% | 73% | 36% | 24% | 72% | 48% | 80% | 80% | 91% | 70% |
| **22%** | | **27%** | | **54%** | | **74%** | | **30%** | | **59%** | | **80%** | | **80%** | |
| **% reduction in N of a.s. - human** | **yes** | **maybe** | **yes** | **maybe** | **yes** | **maybe** | **yes** | **maybe** | **yes** | **maybe** | **yes** | **maybe** | **yes** | **maybe** | **yes** | **maybe** |
| Carcinogen | 67% | 27% | 42% | 38% | 83% | 56% | 67% | 70% | 33% | 23% | 33% | 56% | 100% | 100% | 100% | 75% |
| Mutagen | 100% | 38% | 0% | 23% | 0% | 54% | 100% | 54% | 67% | 31% | 100% | 69% | 100% | 100% | 67% | 69% |
| Endocrine disrupter | 0% | 36% | 25% | 24% | 75% | 57% | 50% | 69% | 25% | 26% | 75% | 69% | 100% | 90% | 88% | 76% |
| Reproduction/development effects | 27% | 21% | 34% | 38% | 52% | 62% | 73% | 66% | 23% | 23% | 52% | 37% | 100% | 69% | 75% | 74% |
| Acetyl cholinesterase inhibitor | 30% | 57% | 0% | 43% | 30% | 29% | 100% | 100% | 50% | 14% | 100% | 57% | 90% | 86% | 100% | 57% |
| Neurotoxicant | 13% | 27% | 31% | 23% | 44% | 50% | 88% | 77% | 19% | 23% | 81% | 67% | 100% | 83% | 81% | 80% |
| Respiratory tract irritant | 27% | 47% | 51% | 47% | 49% | 65% | 76% | 71% | 27% | 29% | 63% | 35% | 75% | 76% | 76% | 82% |
| Skin irritant | 36% | 21% | 41% | 38% | 40% | 59% | 88% | 79% | 17% | 41% | 62% | 62% | 81% | 86% | 72% | 83% |
| Skin sensitiser | 43% | 33% | 45% | 24% | 43% | 48% | 84% | 81% | 29% | 19% | 59% | 57% | 76% | 95% | 76% | 86% |
| Eye irritant | 28% | 24% | 46% | 20% | 39% | 68% | 84% | 72% | 24% | 16% | 54% | 40% | 79% | 72% | 73% | 88% |
| Phototoxicant | 0% | 50% | 0% | 50% | 100% | 50% | 0% | 75% | 0% | 25% | 0% | 25% | 100% | 75% | 100% | 75% |
| Average reduction  Overall hazard reduction | 34% | 35% | 29% | 33% | 50% | 54% | 74% | 74% | 29% | 25% | 62% | 52% | 91% | 85% | 83% | 77% |
| **34%** | | **31%** | | **52%** | | **74%** | | **27%** | | **57%** | | **88%** | | **80%** | |


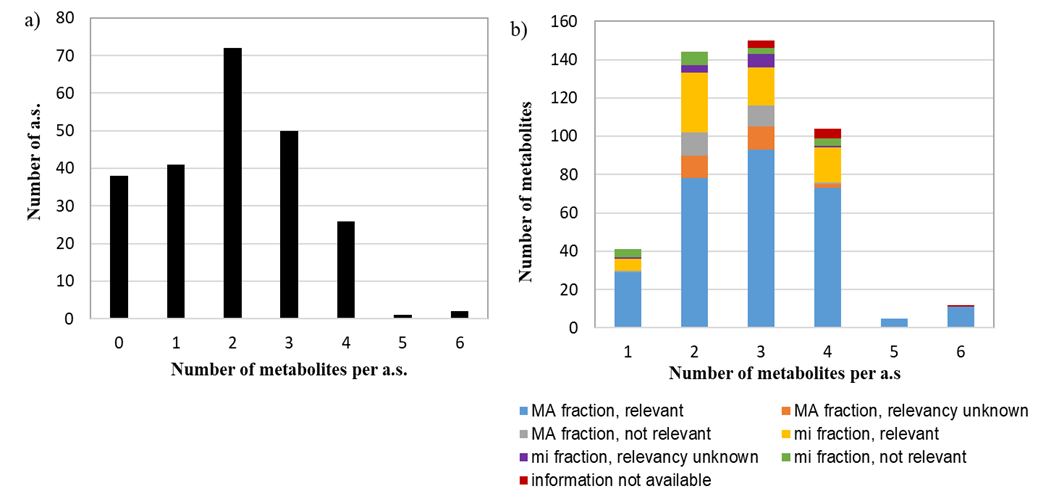


**Figure S1 – Number of known soil metabolites of 230 selected a.s. (BAU scenario, a) and distribution of those metabolites according to formation fraction and relevancy (b).** Metabolite information was extracted from PPDB (2019). a.s. – active substance; MA – major; mi – minor. Major and minor fractions refer to metabolites with maximum formation fractions above or below 10%, respectively. Relevant metabolites are those with target activity comparable to the parent substance, comparable or higher hazard level than the parent substance or severe toxicological properties (EC 1107/2009). Number of selected a.s.=230. Number of soil metabolites=414, of which 243 are of relevance for further study and investigation.


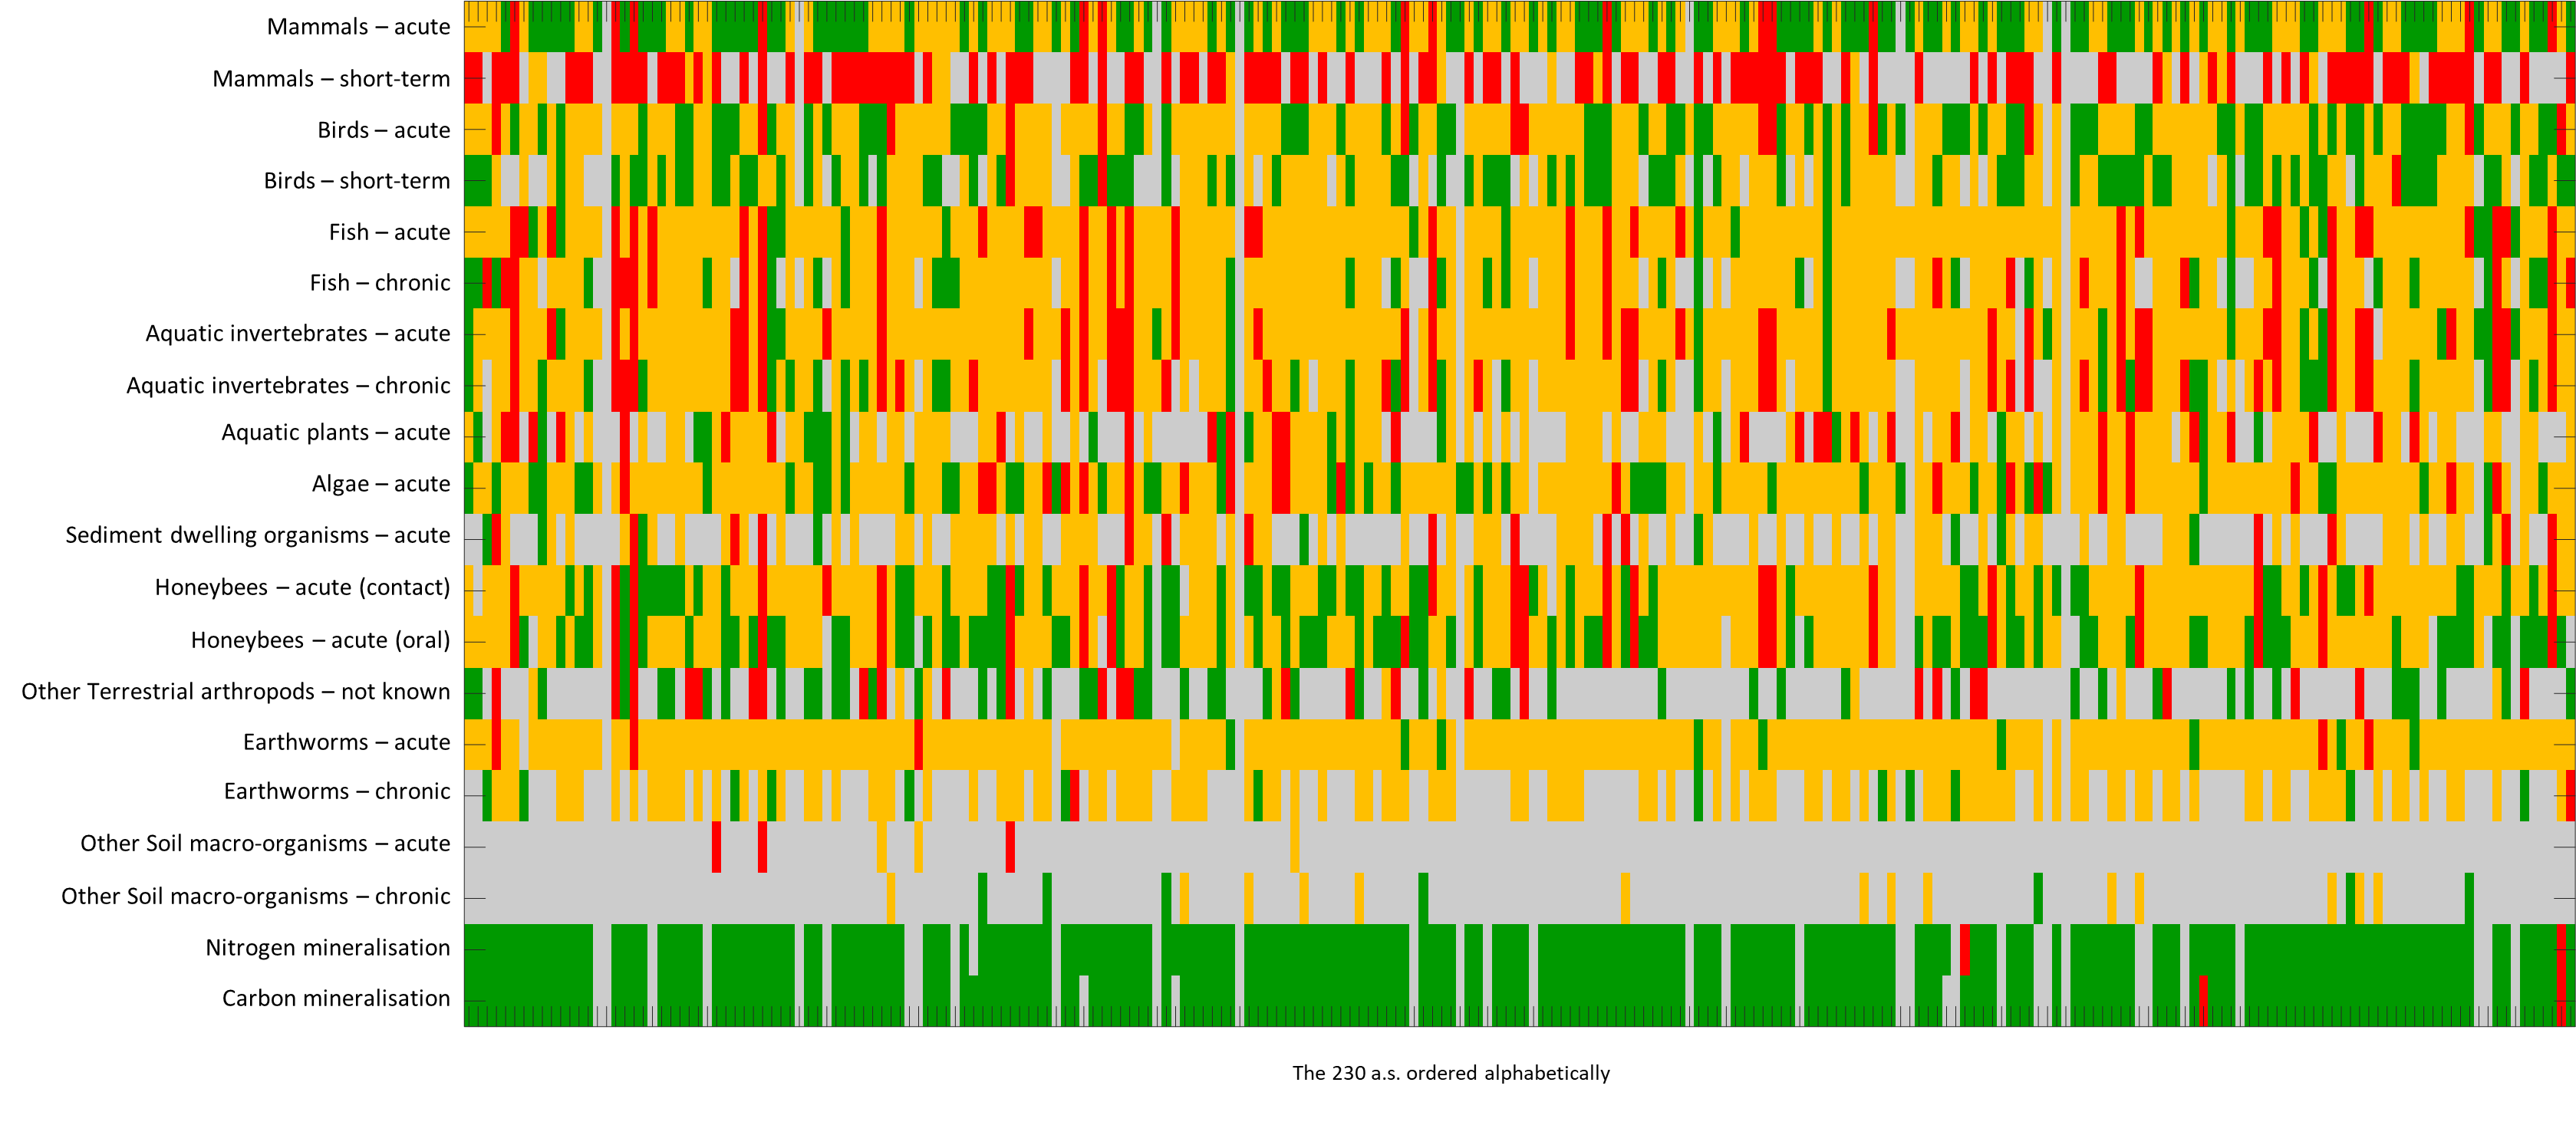


**Figure S2 – Hazard profile of the 230 selected a.s. (BAU scenario) for the 20 eco-toxicological endpoints considered in this study, according to PPDB database.** Different colours indicate different hazard scores, which were attributed to the severity of effect: low toxicity = GREEN, no data found = GREY, moderate toxicity = YELLOW, high toxicity = RED. 23% of the cells in the diagram are coloured green, 27% are coloured grey, 41% are coloured yellow and the remaining 9% are coloured red.


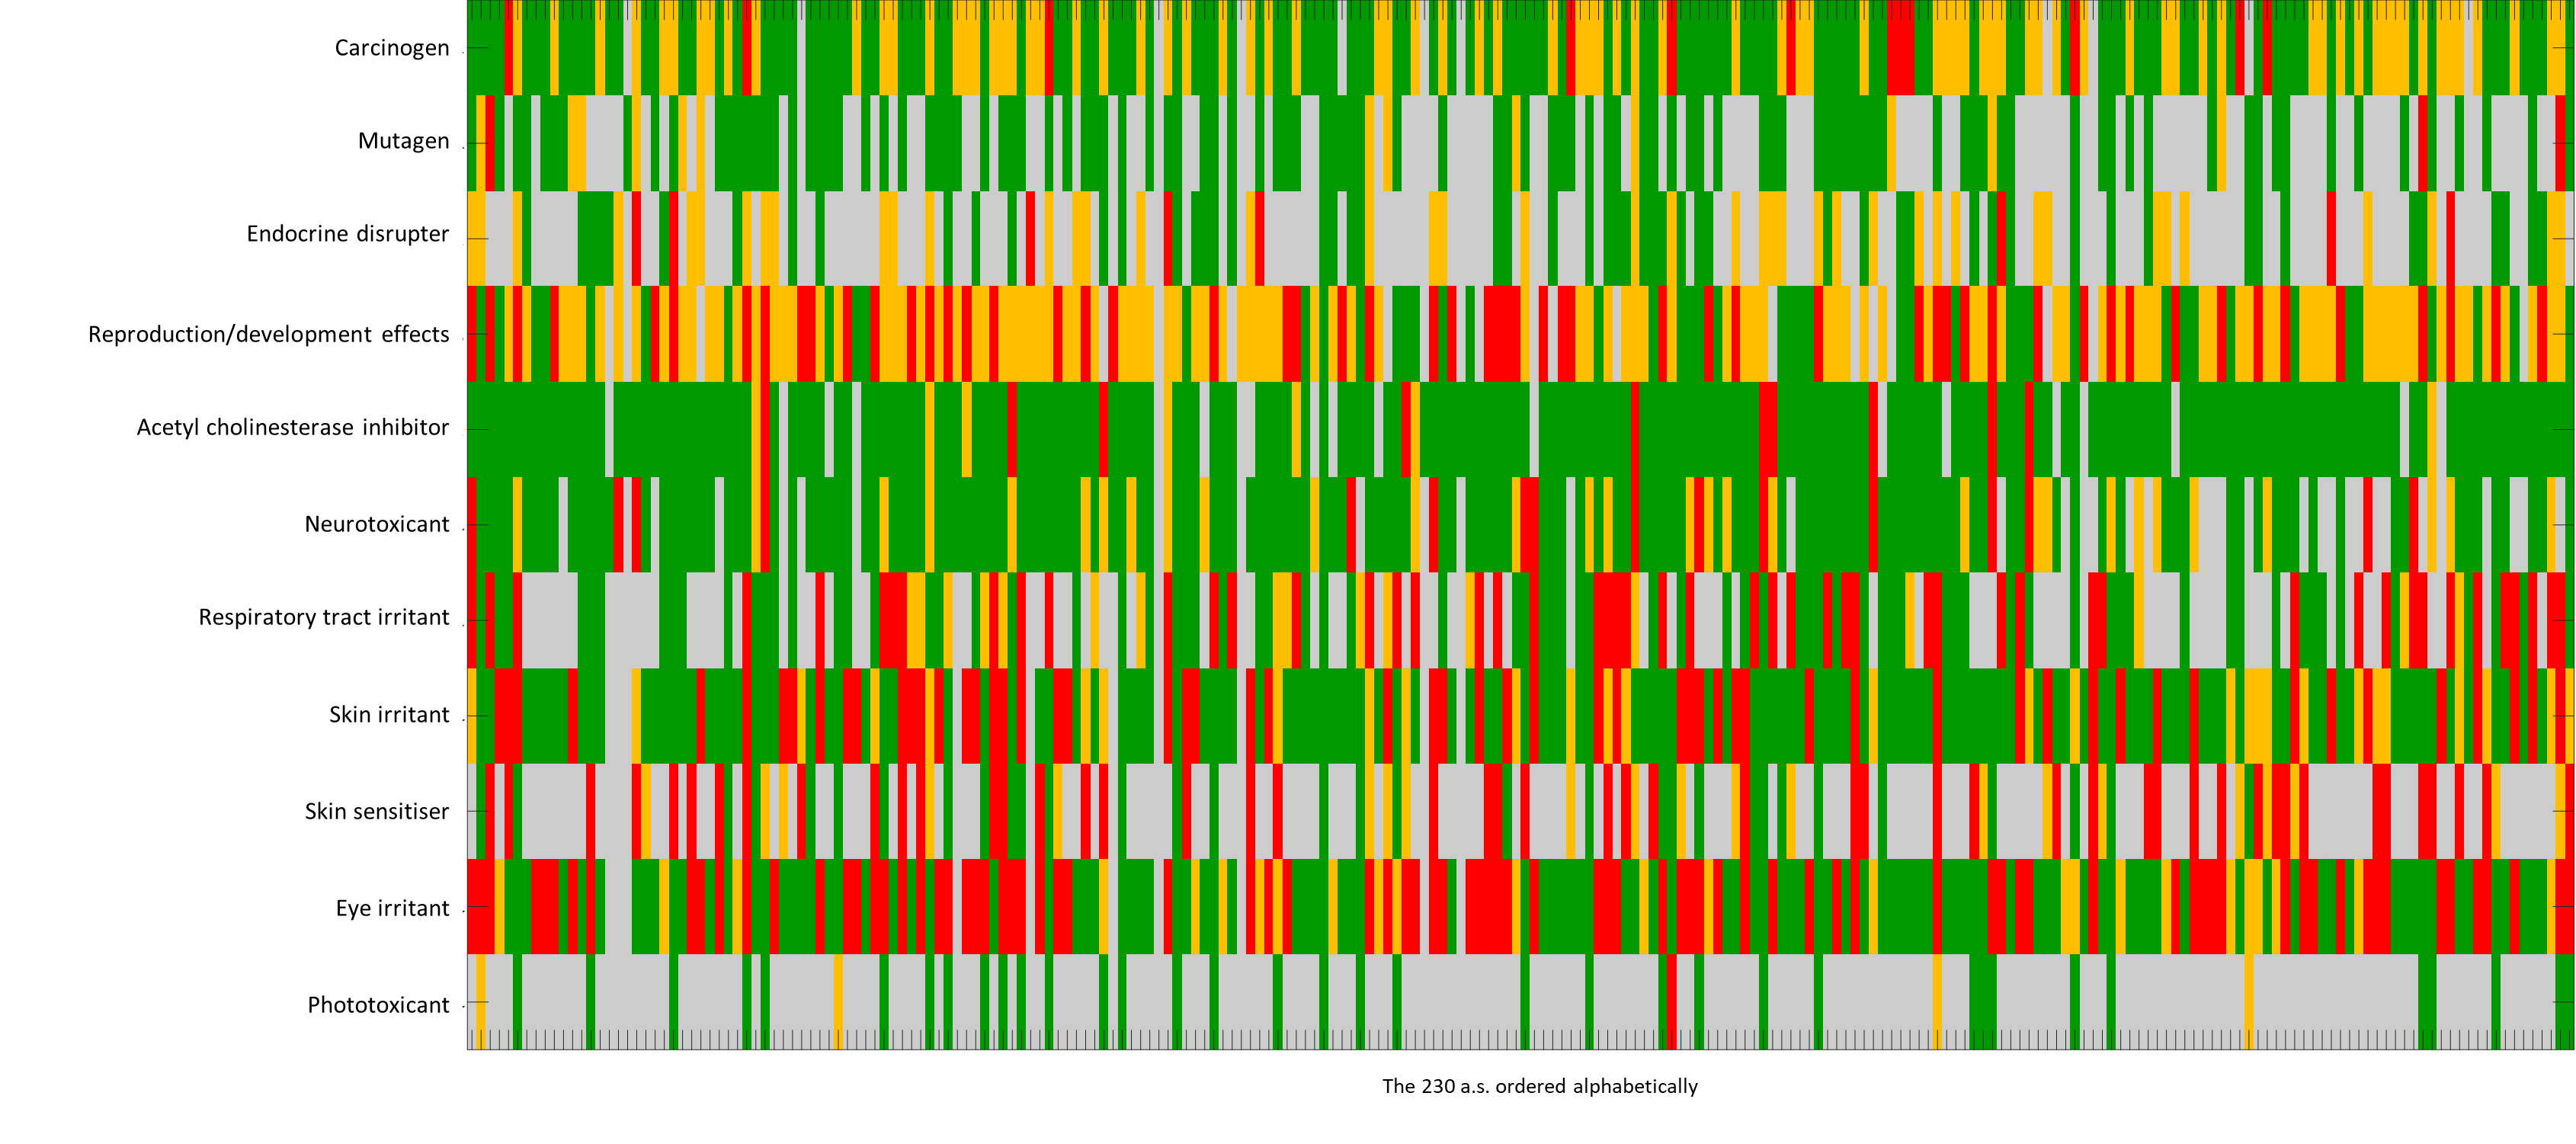


**Figure S3 – Hazard profile of the 230 selected a.s. (BAU scenario) for the 11 human endpoints considered in this study, according to PPDB database.** Different colours indicate different hazard scores, which were attributed to the severity of effect: no effect = GREEN, unknown effect = GREY, possible effect = YELLOW, known adverse effect = RED. 42% of the cells in the diagram are coloured green, 29% are coloured grey, 15% are coloured yellow and the remaining 14% are coloured red.
